# Supplementary material for: RB1 expression and HR proficiency define a poor-outcome molecular subtype of high grade serous ovarian carcinoma
Source: Research Square preprint supplement (doi:10.21203/rs.3.rs-5523163/v1), 2025-07-14
Supplement: Supplementary file 1 [file 04d3a766d53a6e0c5953b863.xlsx]

## Sheet: Sheet1
Supplementary Table 5. The effect of RB1 expression status on molecular characteristics and gene expression differences in BRCAa, NBHRa, and HRi HGSOC cases evaluated by comprehensive genomic and immune profiling.
	All patients					BRCAa					NBHRa					HRi
Variable	RB1 low n	RB1 high n	Summary stats low vs high	OR	P	RB1 low n	RB1 high n	Summary stats low vs high	OR	P	RB1 low n	RB1 high n	Summary stats low vs high	OR	P	RB1 low n	RB1 high n	Summary stats low vs high	OR	P
Total number of patients	114	218				44	49				28	78				42	91
TMB mutations/Mb (Mean±SD)	112	217	4.7±2.8 vs 4.2±2.4	-	0.23	44	48	5.2±2.9 vs 4.5±3	-	0.23	28	78	5±3.1 vs 4.1±2.1	-	0.27	40	91	3.9±2.3 vs 4±2.3	-	0.68
TMB high vs not high (N & %)	112	217				44	48				28	78				40	91
High (≥10)			6 (5.4%) vs 5 (2.3%)					3 (6.8%) vs 3 (6.2%)					3 (10.7%) vs 1 (1.3%)					0 (0%) vs 1 (1.1%)
Not high (<10)			106 (94.6%) vs 212 (97.7%)	0.4 [0.12-1.29]	0.12			41 (93.2%) vs 45 (93.8%)	0.9 [0.17-4.71]	0.89			25 (89.3%) vs 77 (98.7%)	0.14 [0.01-0.89]	0.038			40 (100%) vs 90 (98.9%)	1.55 [0.08-228.8]	0.78
PD-L1 score (Mean±SD)	114	217	4.6±11 vs 2.7±7.1	-	0.076	44	49	4.6±9 vs 3.9±10.5	-	0.8	28	77	4.5±13.6 vs 2.3±6.4	-	0.3	42	91	4.7±11.3 vs 2.4±5.1	-	0.093
PD-L1 negative vs positive (N & %)	114	217				44	49				28	77				42	91
Negative			60 (52.6%) vs 127 (58.5%)					19 (43.2%) vs 28 (57.1%)					17 (60.7%) vs 49 (63.6%)					24 (57.1%) vs 50 (54.9%)
Positive (≥1)			54 (47.4%) vs 90 (41.5%)	1.22 [0.76-1.93]	0.41			25 (56.8%) vs 21 (42.9%)	1.64 [0.73-3.74]	0.23			11 (39.3%) vs 28 (36.4%)	1.06 [0.42-2.57]	0.9			18 (42.9%) vs 41 (45.1%)	0.98 [0.46-2.09]	0.96
TIGS score (Mean±SD)	114	218	37.7±17.2 vs 49±20.6	-	9.3e-07	44	49	38.9±15.7 vs 42.6±19.4	-	0.3	28	78	37.3±18.6 vs 50.8±18.9	-	0.0015	42	91	36.7±18 vs 51±22	-	0.00091
TIGS strong vs moderate vs weak (N & %)	114	218				44	49				28	78				42	91
Strong			11 (9.6%) vs 70 (32.1%)	4.32 [2.28-8.88]	2.2e-06			4 (9.1%) vs 9 (18.4%)	2.18 [0.67-8.13]	0.2			3 (10.7%) vs 24 (30.8%)	3.27 [1.07-13.09]	0.037			4 (9.5%) vs 37 (40.7%)	5.54 [2.04-18.63]	0.00044
Moderate			32 (28.1%) vs 61 (28%)	0.98 [0.59-1.63]	0.93			13 (29.5%) vs 14 (28.6%)	0.94 [0.39-2.29]	0.9			7 (25%) vs 28 (35.9%)	1.84 [0.71-5.3]	0.22			12 (28.6%) vs 19 (20.9%)	0.71 [0.31-1.66]	0.43
Weak			71 (62.3%) vs 87 (39.9%)	0.41 [0.25-0.64]	0.00012			27 (61.4%) vs 26 (53.1%)	0.71 [0.31-1.63]	0.42			18 (64.3%) vs 26 (33.3%)	0.25 [0.1-0.62]	0.0025			26 (61.9%) vs 35 (38.5%)	0.41 [0.19-0.86]	0.018
CP score (Mean±SD)	114	218	44.3±21.4 vs 50.9±24.2	-	0.033	44	49	48.5±23.6 vs 54.8±22.8	-	0.23	28	78	47.7±20.8 vs 52.4±22.8	-	0.32	42	91	37.6±18.1 vs 47.5±25.8	-	0.054
CP high vs moderate vs poor (N & %)	114					44	49				28	78				42	91
High			22 (19.3%) vs 69 (31.7%)	1.86 [1.09-3.26]	0.022			12 (27.3%) vs 18 (36.7%)	1.52 [0.64-3.68]	0.34			7 (25%) vs 23 (29.5%)	1.37 [0.52-3.98]	0.54			3 (7.1%) vs 28 (30.8%)	4.79 [1.62-18.82]	0.0032
Moderate			57 (50%) vs 87 (39.9%)	0.64 [0.41-1.02]	0.059			20 (45.5%) vs 20 (40.8%)	0.81 [0.36-1.83]	0.61			13 (46.4%) vs 36 (46.2%)	0.92 [0.38-2.2]	0.85			24 (57.1%) vs 31 (34.1%)	0.38 [0.18-0.81]	0.012
Poor			35 (30.7%) vs 62 (28.4%)	0.95 [0.58-1.58]	0.85			12 (27.3%) vs 11 (22.4%)	0.81 [0.32-2.05]	0.65			8 (28.6%) vs 19 (24.4%)	0.78 [0.3-2.09]	0.61			15 (35.7%) vs 32 (35.2%)	1.06 [0.49-2.31]	0.89
CTAB score (Mean±SD)	114	218	325.7±245.2 vs 318.8±227.4	-	0.32	44	49	343.8±268 vs 232.6±163.3	-	0.72	28	78	342.9±242.3 vs 362.8±231.3	-	0.22	42	91	295.3±223.9 vs 327.6±242.6	-	0.62
CTAB high vs low (N & %)	114	218				44	49				28	78				42	91
High			83 (72.8%) vs 147 (67.4%)					32 (72.7%) vs 26 (53.1%)					22 (78.6%) vs 60 (76.9%)					29 (69%) vs 61 (67%)
Low			31 (27.2%) vs 71 (32.6%)	0.75 [0.45-1.23]	0.25			12 (27.3%) vs 23 (46.9%)	0.42 [0.17-0.99]	0.046			6 (21.4%) vs 18 (23.1%)	0.96 [0.32-2.57]	0.93			13 (31%) vs 30 (33%)	0.86 [0.38-1.87]	0.7
RB1 nRPM (Mean±SD)	114	218	475.9±185.6 vs 1557.9±879.3	-	6.6e-43	44	49	469.6±196.5 vs 1499±783.3	-	8.4e-09	28	78	473.3±178.4 vs 1613.3±922.4	-	7.8e-21	42	91	484.2±182.7 vs 1542.2±896.8	-	4.8e-25
BRCA1 nRPM (Mean±SD)	114	218	201±169.1 vs 162.6±103	-	0.87	44	49	216.6±169.3 vs 138.2±96.1	-	0.5	28	78	196.1±180 vs 176.5±100.9	-	0.5	42	91	187.9±164.3 vs 163.9±107.1	-	0.66
BRCA2 nRPM (Mean±SD)	114	218	159.2±118.3 vs 237.1±185.5	-	2.1e-07	44	49	163.1±124.1 vs 225.6±145.2	-	0.0074	28	78	180.4±138.2 vs 207.1±139.8	-	0.39	42	91	140.9±95.8 vs 268.9±230.4	-	4.2e-05
CD3 nRPM (Mean±SD)	114	218	271.1±324.5 vs 471.1±581.5	-	0.00015	44	49	271.5±261 vs 343.8±374.4	-	0.49	28	78	307.3±424.3 vs 497.2±530.1	-	0.0071	42	91	246.6±314.2 vs 517.1±698.9	-	0.0078
CD68 nRPM (Mean±SD)	114	218	2053.8±1747.1 vs 2891.3±2624.4	-	0.0012	44	49	1952.1±1663.2 vs 2022.6±1562.5	-	0.91	28	78	2209.5±2206.3 vs 2999.4±2326.2	-	0.0084	42	91	2056.4±1509.3 vs 3266.4±3179.9	-	0.045
CD20 nRPM (Mean±SD)	113	217	43.4±172 vs 82.3±243.2	-	0.00046	43	49	37.3±82 vs 82.6±371.8	-	0.67	28	78	69.9±317.2 vs 109.4±260	-	0.013	42	90	32.1±84 vs 58.5±96.4	-	0.013
PTEN nRPM (Mean±SD)	114	218	1127.5±893.3 vs 3013.3±2014.2	-	4e-24	44	49	1256.9±1110.8 vs 2954±2154.4	-	1.6e-05	28	78	920.9±615 vs 2796.6±1905.4	-	2e-10	42	91	1129.8±780.5 vs 3231.1±2027.2	-	8.9e-12
MKI67 nRPM (Mean±SD)	114	218	1062.3±1110.4 vs 1154.4±1041	-	0.18	44	49	1274.3±1401 vs 1237.1±1008.3	-	0.32	28	78	1187.3±1176.2 vs 1205.8±1162	-	0.85	42	91	756.8±523.4 vs 1065.8±949.4	-	0.25
	34.3373	65.6627				47.3118	52.6882				26.4151	73.5849				31.5789	68.4211
