# Supplementary material for: RB1 expression and HR proficiency define a poor-outcome molecular subtype of high grade serous ovarian carcinoma
Source: Research Square preprint supplement (doi:10.21203/rs.3.rs-5523163/v1), 2025-07-14
Supplement: Supplementary file 2 [file 25922ace68118ad5ca751719.xlsx]

## Sheet: Supplemental Table 2
	Supplemental Table 2. Molecular characteristics associated with RB1 copy number alterations in the Ovarian Serous Cystadenocarcinoma TCGA PanCancer Atlas.
		Homozygous Deletion	Hemizygous Deletion	Copy Number Neutral	Amplification	Total
	Sample Size (n)	19 (8.2%)	131 (56.7%)	58 (25.1%)	23 (10.0%)	231 (100%)
	Median RB1 Gene Expression (nTPM)	353.24	882.323	1244.71	1567.58	947
	RB1-Low, n (%)	16 (6.9%)	37 (16.0%)	4 (1.7%)	0 (0%)	57 (100%)
	RB1-High, n (%)	3 (1.3%)	94 (40.7%)	54 (23.4%)	23 (10.0%)	174 (100%)
	HRP-RB1-Low (%)	11 (4.7%)	18 (7.7%)	3 (1.3%)	0 (0%)	32 (13.9%)
	HRP-RB1-High (%)	1 (0.4%)	63 (27.0%)	34 (14.6%)	19 (8.2%)	115 (49.8%)
	HRD-RB1-Low (%)	6 (2.6%)	19 (8.2%)	1 (0.4%)	0 (0%)	25 (10.8%)
	HRD-RB1-High (%)	1 (0.4%)	32 (13.7%)	21 (9.0%)	4 (1.7%)	59 (25.5%)
