# Supplementary material for: RB1 expression and HR proficiency define a poor-outcome molecular subtype of high grade serous ovarian carcinoma
Source: Research Square preprint supplement (doi:10.21203/rs.3.rs-5523163/v1), 2025-07-14
Supplement: Supplementary file 3 [file 36da4bb055a75f16e8e697e0.xlsx]

## Sheet: Sheet1
Supplemental Table 7. Molecular characteristics and gene expression differences in BRCAa and HRi HGSOC with low RB1 mRNA expression.
RB1 low
	All patients (RB1-Low)		BRCAa(RB1-Low)		NBHRa (RB1-Low)		HRi (RB1-Low)		BRCAa vs NBHRa		BRCAa vs HRi		NBHRa vs HRi
Variable	N	Frequency	N	Frequency	N	Frequency	N	Frequency	OR	P	OR	P	OR	P
Total number of patients	188		44		28		42
TMB mutations/Mb (Mean±SD)	112	4.7±2.8	44	5.2±2.9	28	5±3.1	40	3.9±2.3	-	0.11	-	0.0058	-	0.039
TMB high/not high (N & %)	112		44		28		40
High (≥10)		6 (5.4%)		3 (6.8%)		3 (10.7%)		0 (0%)
Not high (<10)		106 (94.6%)		41 (93.2%)		25 (89.3%)		40 (100%)	0.72 [0.14-3.79]	0.69	0.11 [0-1.22]	0.076	0.12 [0-1.59]	0.12
PD-L1 score (Mean±SD)	114	4.6±11	44	4.6±9	28	4.5±13.6	42	4.7±11.3	-	0.69	-	0.87	-	0.69
PD-L1 negative/positive (N & %)	114		44		28		42
Negative		60 (52.6%)		19 (43.2%)		17 (60.7%)		24 (57.1%)
Positive (≥1)		54 (47.4%)		25 (56.8%)		11 (39.3%)		18 (42.9%)	0.49 [0.16-1.46]	0.2	0.49 [0.2-1.16]	0.1	0.8 [0.26-2.38]	0.69
TIGS score (Mean±SD)	114	37.7±17.2	44	38.9±15.7	28	37.3±18.6	42	36.7±18	-	0.34	-	0.51	-	0.41
TIGS strong/moderate/weak (N & %)	114		44		28		42
Strong		11 (9.6%)		4 (9.1%)		3 (10.7%)		4 (9.5%)	0.7 [0.13-3.6]	0.67	0.94 [0.23-3.92]	0.93	0.3 [0.02-2.17]	0.24
Moderate		32 (28.1%)		13 (29.5%)		7 (25%)		12 (28.6%)	0.92 [0.27-3.2]	0.89	1.01 [0.39-2.62]	0.98	1.12 [0.34-3.74]	0.85
Weak		71 (62.3%)		27 (61.4%)		18 (64.3%)		26 (61.9%)	1.25 [0.41-3.89]	0.69	1.01 [0.42-2.45]	0.98	1.32 [0.43-4.16]	0.63
CP score (Mean±SD)	114	44.3±21.4	44	48.5±23.6	28	47.7±20.8	42	37.6±18.1	-	0.58	-	0.084	-	0.15
CP high/moderate/poor (N & %)	114		44		28		42
High		22 (19.3%)		12 (27.3%)		7 (25%)		3 (7.1%)	1.51 [0.41-6.02]	0.54	0.29 [0.07-1]	0.05	0.23 [0.04-1.05]	0.057
Moderate		57 (50%)		20 (45.5%)		13 (46.4%)		24 (57.1%)	0.83 [0.27-2.47]	0.74	1.51 [0.63-3.67]	0.35	2.53 [0.85-8.03]	0.095
Poor		35 (30.7%)		12 (27.3%)		8 (28.6%)		15 (35.7%)	0.88 [0.27-2.89]	0.83	1.28 [0.51-3.26]	0.6	0.85 [0.25-2.74]	0.78
CTAB score (Mean±SD)	114	325.7±245.2	44	343.8±268	28	342.9±242.3	42	295.3±223.9	-	0.63	-	0.2	-	0.81
CTAB high/low (N & %)	114		44		28		42
High		83 (72.8%)		32 (72.7%)		22 (78.6%)		29 (69%)
Low		31 (27.2%)		12 (27.3%)		6 (21.4%)		13 (31%)	1.61 [0.47-5.72]	0.45	0.99 [0.39-2.5]	0.99	0.62 [0.18-2.02]	0.42
RB1 nRPM (Mean±SD)	114	475.9±185.6	44	469.6±196.5	28	473.3±178.4	42	484.2±182.7	-	0.94	-	0.14	-	0.49
BRCA1 nRPM (Mean±SD)	114	201±169.1	44	216.6±169.3	28	196.1±180	42	187.9±164.3	-	0.43	-	0.76	-	0.48
BRCA2 nRPM (Mean±SD)	114	159.2±118.3	44	163.1±124.1	28	180.4±138.2	42	140.9±95.8	-	0.2	-	0.76	-	0.29
CD3 nRPM (Mean±SD)	114	271.1±324.5	44	271.5±261	28	307.3±424.3	42	246.6±314.2	-	0.46	-	0.74	-	0.19
CD68 nRPM (Mean±SD)	114	2053.8±1747.1	44	1952.1±1663.2	28	2209.5±2206.3	42	2056.4±1509.3	-	0.12	-	0.9	-	0.63
MS4A1 nRPM (Mean±SD)	113	43.4±172	43	37.3±82	28	69.9±317.2	42	32.1±84	-	0.25	-	0.89	-	0.91
PTEN nRPM (Mean±SD)	114	1127.5±893.3	44	1256.9±1110.8	28	920.9±615	42	1129.8±780.5	-	0.51	-	0.39	-	0.2
MKI67 nRPM (Mean±SD)	114	1062.3±1110.4	44	1274.3±1401	28	1187.3±1176.2	42	756.8±523.4	-	0.55	-	0.66	-	0.36
