# Supplementary material for: RB1 expression and HR proficiency define a poor-outcome molecular subtype of high grade serous ovarian carcinoma
Source: Research Square preprint supplement (doi:10.21203/rs.3.rs-5523163/v1), 2025-07-14
Supplement: Supplementary file 4 [file 42d6d9cac8d9ea0c6bfadc01.xlsx]

## Sheet: Sheet1
Supplementary Table 6. Complete list of gene expression comparisons of RBL vs RBH BRCAa, NBHRa, and HRi HGSOC evaluated by CGIP.
	All patients			Group 1 (BRCAa)			Group 2 (NBHRa)			Group 3 (HRi)
Gene	Estimated fold change	P	FDR	Estimated fold change	P	FDR	Estimated fold change	P	FDR	Estimated fold change	P	FDR
NTN3	0.73	0.037	0.054	0.77	0.38	0.56	0.56	0.035	0.067	0.68	0.12	0.18
GADD45GIP1	0.75	3.1e-06	1.3e-05	0.84	0.12	0.28	0.65	0.00023	0.0018	0.76	0.0043	0.015
CD276	0.69	1.2e-07	7.5e-07	0.58	4.6e-05	0.0045	0.71	0.012	0.029	0.76	0.009	0.025
HMBS	0.76	7e-05	0.00019	0.82	0.22	0.4	0.76	0.0086	0.022	0.71	0.00029	0.0021
ABCF1	0.84	1.4e-05	4.5e-05	0.87	0.067	0.21	0.72	7.2e-05	0.00074	0.88	0.043	0.082
IL17F	1.12	0.014	0.021	1.06	0.26	0.45	1.18	0.13	0.2	1.1	0.2	0.28
SDHA	1.24	7.8e-06	2.8e-05	1.51	0.00087	0.018	1.06	0.42	0.51	1.22	0.0012	0.0062
BCL2L11	1.14	0.023	0.034	1.01	0.91	0.95	1.2	0.082	0.14	1.18	0.06	0.1
GUSB	1.14	0.0078	0.013	1.03	0.72	0.84	1.1	0.34	0.43	1.25	0.0075	0.022
PTPN6	1.27	0.00036	0.00084	1.33	0.04	0.17	1.1	0.45	0.54	1.28	0.015	0.034
M6PR	1.24	2.6e-05	7.8e-05	1.27	0.0072	0.061	1.17	0.072	0.12	1.25	0.011	0.028
MAPK14	1.17	0.00058	0.0013	1.07	0.38	0.56	1.09	0.37	0.46	1.34	0.00011	0.00097
MYC	1.15	0.14	0.18	1.05	0.76	0.87	1.14	0.36	0.45	1.36	0.069	0.11
BCL6	1.17	0.041	0.058	1.01	0.94	0.96	1.23	0.14	0.21	1.3	0.031	0.062
BUB1	1.21	0.035	0.051	1.18	0.34	0.52	1.15	0.39	0.48	1.36	0.048	0.087
ADORA2A	1.42	0.00096	0.002	1.49	0.1	0.26	1.3	0.11	0.17	1.24	0.15	0.22
ADGRE5	1.26	0.0022	0.004	1.17	0.18	0.37	1.36	0.061	0.11	1.25	0.08	0.13
C10orf54	1.36	0.0027	0.0048	1.36	0.21	0.4	1.39	0.044	0.083	1.24	0.12	0.19
TNFRSF14	1.21	0.027	0.039	1.02	0.9	0.95	1.08	0.62	0.7	1.45	0.012	0.03
TLR9	1.25	0.037	0.053	1.13	0.59	0.73	1.59	0.011	0.028	1.06	0.73	0.79
CDK1	1.43	0.0026	0.0047	1.75	0.053	0.19	1.23	0.26	0.34	1.38	0.062	0.11
STAT5A	1.37	2.8e-05	8.5e-05	1.37	0.063	0.21	1.29	0.03	0.059	1.33	0.01	0.027
CD40	1.11	0.25	0.31	0.77	0.13	0.3	1.08	0.66	0.73	1.47	0.0053	0.017
MELK	1.31	0.012	0.019	1.42	0.17	0.36	1.21	0.28	0.37	1.43	0.019	0.041
ITGAX	1.38	0.0058	0.0097	1.31	0.19	0.38	1.31	0.2	0.28	1.32	0.16	0.23
CD63	1.31	1.1e-06	5.1e-06	1.22	0.054	0.19	1.45	0.00067	0.0038	1.3	0.0023	0.0095
IL2	1.39	1.1e-05	3.6e-05	1.36	0.015	0.1	1.52	0.0033	0.012	1.2	0.13	0.2
PTPN11	1.38	1.6e-11	3.3e-10	1.42	1.7e-05	0.0034	1.3	0.0011	0.0051	1.37	0.00032	0.0022
TBP	1.42	7.3e-07	3.7e-06	1.45	0.066	0.21	1.34	0.0018	0.0072	1.39	1.6e-05	0.00031
STAT3	1.31	8.3e-08	5.8e-07	1.14	0.059	0.2	1.31	0.0076	0.02	1.42	9.3e-05	0.00088
MAD2L1	1.54	2.9e-05	8.7e-05	1.85	0.021	0.12	1.42	0.012	0.029	1.38	0.02	0.043
BCL2	1.48	0.00068	0.0015	1.51	0.1	0.26	1.53	0.022	0.046	1.28	0.17	0.25
MAPK1	1.33	4.2e-06	1.6e-05	1.25	0.13	0.3	1.43	0.00034	0.0023	1.31	0.00057	0.0036
KLRF1	1.65	0.00032	0.00075	2.11	0.0074	0.061	1.04	0.88	0.91	1.73	0.017	0.038
CD4	1.44	0.0019	0.0035	1.36	0.22	0.41	1.61	0.019	0.042	1.28	0.14	0.22
LILRB2	1.4	0.0058	0.0097	1.21	0.44	0.61	1.79	0.0053	0.016	1.17	0.4	0.49
IL15	1.43	0.0053	0.009	1.57	0.074	0.23	1.19	0.47	0.56	1.63	0.017	0.038
TGFB1	1.33	0.0013	0.0024	1.04	0.82	0.91	1.54	0.005	0.016	1.34	0.05	0.089
RPS6	1.33	4.7e-05	0.00013	1.24	0.11	0.27	1.36	0.02	0.042	1.49	0.00035	0.0023
HLA_F	1.37	0.011	0.017	1.32	0.27	0.46	1.51	0.038	0.071	1.29	0.22	0.3
CIITA	1.3	0.02	0.03	1.14	0.47	0.64	1.12	0.61	0.69	1.71	0.0056	0.017
KLF2	1.32	0.043	0.059	0.96	0.88	0.94	1.78	0.021	0.043	1.2	0.44	0.53
IFIT2	1.31	0.016	0.024	1.33	0.19	0.38	1.54	0.019	0.041	1.33	0.12	0.18
FCGR3A	1.61	0.00066	0.0014	1.81	0.047	0.18	1.73	0.019	0.041	1.29	0.21	0.3
CMKLR1	1.2	0.18	0.22	0.76	0.25	0.44	1.93	0.0073	0.02	1.17	0.48	0.57
HLA_DMA	1.35	0.0011	0.0022	1.2	0.24	0.43	1.28	0.11	0.17	1.55	0.0094	0.026
KLRG1	1.44	0.0018	0.0034	1.19	0.4	0.57	1.74	0.015	0.035	1.21	0.33	0.42
PTPN7	1.28	0.054	0.073	0.86	0.55	0.7	1.56	0.06	0.11	1.33	0.16	0.24
TNF	1.33	0.053	0.072	1.13	0.7	0.83	1.15	0.58	0.66	1.71	0.017	0.039
PTK7	1.46	3.8e-06	1.5e-05	1.4	0.091	0.24	1.35	0.02	0.042	1.52	0.00017	0.0014
HERC6	1.4	0.0027	0.0049	1.38	0.2	0.39	1.35	0.096	0.15	1.52	0.013	0.032
IL21	1.52	0.00025	0.00059	1.34	0.087	0.24	1.43	0.092	0.15	1.48	0.059	0.1
TFRC	1.33	0.00012	0.00031	1.08	0.5	0.66	1.42	0.0065	0.019	1.54	0.0013	0.0063
IFITM2	1.35	0.00076	0.0016	1.24	0.17	0.35	1.57	0.0073	0.02	1.43	0.021	0.044
IRF9	1.36	3.5e-06	1.4e-05	1.26	0.046	0.18	1.27	0.05	0.093	1.71	1.1e-06	3.4e-05
IGF1R	1.51	1.3e-05	4.4e-05	1.55	0.028	0.14	1.57	0.0066	0.019	1.46	0.0089	0.025
CBLB	1.39	0.00048	0.0011	1.15	0.45	0.62	1.41	0.048	0.089	1.46	0.0096	0.026
CDKN3	1.7	7.6e-05	0.00021	2.24	0.016	0.1	1.47	0.093	0.15	1.58	0.0059	0.018
IL23A	1.5	0.00072	0.0015	1.38	0.17	0.35	1.45	0.089	0.15	1.46	0.05	0.089
CD80	1.21	0.14	0.18	0.77	0.3	0.48	1.34	0.14	0.2	1.59	0.036	0.071
PYGL	1.51	5.3e-06	2e-05	1.56	0.025	0.13	1.48	0.012	0.029	1.54	0.001	0.0054
LRP1	1.33	0.00089	0.0018	1.01	0.93	0.96	1.61	0.0017	0.0072	1.38	0.041	0.077
FCER1G	1.4	0.0012	0.0024	1.1	0.6	0.74	1.65	0.0083	0.022	1.43	0.036	0.071
CD37	1.31	0.04	0.056	0.9	0.66	0.79	1.83	0.02	0.043	1.23	0.33	0.42
TNFAIP8	1.71	4.9e-06	1.9e-05	2.25	0.0056	0.054	1.23	0.2	0.28	1.75	0.00062	0.0038
AXL	1.36	0.0029	0.005	1.05	0.78	0.88	1.88	0.00026	0.0019	1.27	0.18	0.26
AIF1	1.46	0.001	0.002	1.16	0.5	0.66	1.75	0.0038	0.013	1.34	0.11	0.17
CCR1	1.46	0.0023	0.0043	1.25	0.36	0.54	1.94	0.0016	0.0067	1.26	0.26	0.35
CD160	1.3	0.07	0.095	0.86	0.55	0.7	1.51	0.15	0.22	1.56	0.053	0.094
CD68	1.38	0.0012	0.0024	1.02	0.91	0.95	1.62	0.0084	0.022	1.43	0.045	0.085
PSMB9	1.27	0.021	0.031	1.01	0.96	0.97	1.37	0.097	0.15	1.69	0.0029	0.011
CYBB	1.4	0.0025	0.0046	1.03	0.87	0.93	1.62	0.02	0.043	1.44	0.05	0.089
LAMP1	1.49	5.9e-10	8.3e-09	1.39	0.002	0.031	1.69	8.2e-06	0.00014	1.4	0.0019	0.0081
TAP1	1.39	0.0036	0.0062	1.21	0.44	0.61	1.41	0.056	0.1	1.73	0.0014	0.0069
PDCD1	1.62	0.00084	0.0017	1.5	0.17	0.35	1.72	0.031	0.06	1.48	0.083	0.13
FOXP3	1.53	0.003	0.0052	1.33	0.32	0.49	1.73	0.016	0.037	1.35	0.22	0.3
IL2RA	1.33	0.058	0.079	0.85	0.59	0.73	1.85	0.02	0.043	1.36	0.21	0.29
EIF2AK2	1.43	2.5e-08	2.2e-07	1.3	0.026	0.13	1.44	0.0019	0.0074	1.67	6.2e-07	2.2e-05
STAT1	1.41	6.1e-05	0.00017	1.24	0.12	0.28	1.61	0.00073	0.0038	1.51	0.01	0.027
CSF1R	1.41	0.0021	0.004	1.06	0.82	0.91	1.85	0.0028	0.01	1.38	0.055	0.097
TNFSF10	1.32	0.017	0.026	1.08	0.74	0.86	1.67	0.0081	0.022	1.49	0.037	0.071
BRCA2	1.71	2.1e-07	1.3e-06	1.88	0.0074	0.061	1.12	0.39	0.48	2.01	4.2e-05	0.0005
LAMP3	1.53	0.0016	0.0031	1.69	0.072	0.23	1.53	0.067	0.11	1.63	0.015	0.034
SH2D1B	1.62	0.0019	0.0035	1.37	0.25	0.44	1.35	0.3	0.39	1.8	0.022	0.046
CD70	1.41	0.039	0.056	1.03	0.93	0.96	1.67	0.09	0.15	1.6	0.078	0.13
GBP1	1.41	0.00078	0.0016	1.2	0.3	0.48	1.46	0.035	0.066	1.67	0.0048	0.016
IL1A	1.76	6.1e-05	0.00017	2.08	0.0033	0.039	1.47	0.15	0.21	1.67	0.036	0.07
DGAT2	1.58	0.0006	0.0013	1.58	0.11	0.28	1.53	0.062	0.11	1.7	0.0088	0.025
TCF7	1.59	6e-05	0.00017	1.53	0.083	0.24	1.67	0.016	0.037	1.55	0.011	0.028
OAS2	1.49	0.0028	0.005	1.53	0.1	0.26	1.76	0.01	0.026	1.41	0.11	0.17
PRF1	1.53	0.002	0.0037	1.18	0.51	0.66	1.54	0.076	0.13	1.74	0.016	0.036
NKG7	1.47	0.012	0.019	0.99	0.98	0.99	1.49	0.1	0.16	1.75	0.024	0.051
IFITM1	1.39	0.00027	0.00064	1.19	0.29	0.48	1.7	0.00092	0.0045	1.57	0.0032	0.012
LAG3	1.36	0.0086	0.014	0.85	0.49	0.66	1.38	0.074	0.12	1.83	0.002	0.0084
CXCL11	1.51	0.041	0.058	1.45	0.34	0.52	1.43	0.26	0.34	1.74	0.11	0.17
HLA_DOA	1.68	0.00023	0.00055	1.66	0.09	0.24	1.75	0.0073	0.02	1.55	0.059	0.1
IKZF1	1.65	0.00031	0.00074	1.41	0.21	0.4	1.83	0.017	0.038	1.48	0.066	0.11
SELL	1.59	0.0049	0.0084	1.27	0.43	0.6	2.29	0.0075	0.02	1.31	0.32	0.42
ITGB1	1.5	3.9e-11	7e-10	1.18	0.12	0.29	1.72	7.4e-07	2.3e-05	1.57	2.8e-05	0.0004
CCL2	1.35	0.018	0.026	0.82	0.44	0.61	1.63	0.019	0.041	1.71	0.01	0.027
IL10RA	1.52	0.00042	0.00097	1.1	0.67	0.8	1.74	0.0089	0.023	1.58	0.016	0.037
CD163	1.75	9.6e-06	3.3e-05	1.65	0.067	0.21	2.1	0.00052	0.0033	1.44	0.056	0.098
CD274	1.37	0.014	0.022	0.86	0.54	0.7	1.06	0.8	0.85	2.33	3.6e-05	0.00045
HLA_DPB1	1.53	0.0005	0.0011	1.27	0.26	0.44	1.79	0.018	0.039	1.63	0.014	0.033
CD6	1.6	0.00097	0.002	1.25	0.4	0.57	1.72	0.055	0.1	1.65	0.024	0.051
LYZ	1.58	0.005	0.0086	1.1	0.74	0.86	1.63	0.09	0.15	1.71	0.052	0.092
FAS	1.46	3.1e-05	9.3e-05	1.04	0.8	0.9	1.74	0.00072	0.0038	1.69	0.00077	0.0044
SNAI1	1.56	0.00022	0.00055	1.15	0.56	0.71	1.8	0.0021	0.0082	1.62	0.014	0.033
IL7	1.65	0.00026	0.00061	1.4	0.25	0.44	1.83	0.0053	0.016	1.62	0.024	0.051
HLA_DQA2	1.49	0.0082	0.013	0.98	0.94	0.96	1.32	0.33	0.42	2.02	0.0053	0.017
ITK	1.76	0.0012	0.0023	1.54	0.21	0.4	1.87	0.052	0.095	1.55	0.095	0.15
CD83	1.7	5.7e-07	2.9e-06	1.53	0.12	0.29	1.71	0.00058	0.0035	1.75	1.6e-05	0.00031
SAMHD1	1.66	3.3e-08	2.6e-07	1.47	0.059	0.2	1.61	0.00089	0.0045	1.81	1.8e-05	0.00032
IL18	1.71	3e-07	1.7e-06	1.6	0.039	0.17	1.47	0.025	0.051	1.91	5.5e-05	0.0006
SRGN	1.59	5.9e-06	2.2e-05	1.23	0.25	0.44	2.06	0.00019	0.0015	1.51	0.019	0.041
CD33	1.61	6.9e-05	0.00019	1.29	0.3	0.48	2.06	0.0019	0.0074	1.54	0.012	0.031
TAGAP	1.92	1.1e-05	3.6e-05	1.93	0.023	0.13	1.76	0.027	0.054	1.68	0.027	0.054
EGFR	1.81	3.6e-10	5.4e-09	1.98	0.0021	0.032	1.92	3.6e-05	0.00043	1.63	0.00027	0.002
NCAM1	1.65	0.0039	0.0067	1.47	0.26	0.45	2.52	0.0018	0.0072	1.36	0.29	0.38
HIF1A	1.7	1.3e-16	1.7e-14	1.59	4.4e-05	0.0045	1.67	1.3e-05	0.00019	1.78	2.1e-07	1.1e-05
CCL22	1.58	0.016	0.024	0.93	0.85	0.92	2.28	0.024	0.048	1.41	0.23	0.31
ICAM1	1.63	8.2e-05	0.00022	1.36	0.2	0.4	2.02	0.0004	0.0026	1.48	0.065	0.11
DDX58	1.61	2.3e-06	1e-05	1.55	0.066	0.21	1.51	0.005	0.016	1.95	6.6e-06	0.00015
NRP1	1.6	1.7e-08	1.6e-07	1.34	0.019	0.11	1.84	0.00011	0.00096	1.68	0.0007	0.0041
C1QB	1.61	0.00019	0.00046	1.26	0.31	0.49	2.2	0.00063	0.0036	1.57	0.03	0.06
CD47	1.64	4.2e-09	4.6e-08	1.39	0.017	0.11	1.73	0.00018	0.0014	1.82	6.2e-05	0.00062
CD86	1.8	1.1e-05	3.6e-05	1.66	0.082	0.24	1.9	0.0016	0.0069	1.7	0.012	0.031
CSF2RB	1.74	6.5e-05	0.00018	1.34	0.28	0.47	1.91	0.0047	0.015	1.7	0.017	0.038
ITGAL	1.6	0.00072	0.0015	1.12	0.65	0.78	2.02	0.0066	0.019	1.58	0.045	0.084
IL12A	2	6.1e-06	2.2e-05	2.59	0.0023	0.032	1.72	0.068	0.12	1.79	0.01	0.027
HLA_DRA	1.78	3.1e-07	1.7e-06	1.75	0.0057	0.054	1.79	0.0042	0.014	1.82	0.0023	0.0093
OAS1	1.6	1.4e-05	4.5e-05	1.5	0.044	0.17	1.94	0.00033	0.0023	1.69	0.0045	0.015
CD3D	1.59	0.0077	0.013	1.03	0.93	0.96	1.92	0.027	0.054	1.68	0.068	0.11
ITGB7	2.21	1.1e-10	1.8e-09	2.91	0.00036	0.012	1.77	0.00061	0.0035	1.8	0.00086	0.0045
FCGR2B	1.71	0.00085	0.0017	1.31	0.34	0.52	2	0.018	0.039	1.64	0.062	0.11
ITGA1	1.63	4e-06	1.6e-05	1.35	0.083	0.24	1.89	0.0015	0.0063	1.79	0.0018	0.0078
IL10	1.89	6.1e-06	2.2e-05	1.5	0.15	0.34	1.88	0.0019	0.0074	1.81	0.012	0.03
IL1B	1.76	9e-05	0.00024	1.42	0.2	0.39	1.53	0.11	0.17	2.05	0.0018	0.0078
TDO2	1.68	0.0047	0.0081	1.55	0.2	0.39	2.27	0.011	0.028	1.49	0.19	0.27
CXCL13	1.71	0.0089	0.014	1.27	0.55	0.7	2.13	0.029	0.057	1.65	0.14	0.21
HLA_DQA1	2.32	9e-05	0.00024	3.45	0.0014	0.027	1.26	0.53	0.62	2.43	0.017	0.038
CD74	1.76	7.6e-07	3.8e-06	1.6	0.026	0.13	1.83	0.0041	0.014	1.9	0.00086	0.0045
CD48	1.7	0.00021	0.00052	1.22	0.49	0.66	1.83	0.0097	0.024	1.81	0.011	0.028
FCGR1A	1.94	3.6e-06	1.5e-05	2.03	0.013	0.093	2.21	0.00072	0.0038	1.64	0.036	0.07
GZMH	1.93	0.00017	0.00044	1.47	0.21	0.4	1.93	0.028	0.056	1.82	0.038	0.073
FUT4	2.11	1.2e-09	1.4e-08	2.48	0.0012	0.023	1.88	0.00012	0.001	1.91	0.0007	0.0041
TIGIT	1.58	0.0096	0.015	0.98	0.95	0.96	1.75	0.063	0.11	1.94	0.025	0.051
NFATC1	1.9	9e-09	8.7e-08	1.83	0.015	0.099	1.82	0.0011	0.0051	1.92	0.00012	0.0011
EOMES	1.92	0.00022	0.00054	1.39	0.33	0.5	1.52	0.18	0.25	2.22	0.0041	0.014
HLA_C	1.61	0.027	0.039	1.12	0.78	0.88	2.04	0.079	0.13	1.6	0.18	0.25
HAVCR2	1.79	4.7e-08	3.3e-07	1.46	0.04	0.17	2.04	0.00015	0.0012	1.73	0.003	0.011
CD244	2.11	2.9e-06	1.2e-05	2.07	0.018	0.11	1.75	0.051	0.094	2.01	0.0053	0.017
CD3E	1.77	0.001	0.0021	1.3	0.43	0.61	2.09	0.014	0.032	1.73	0.048	0.087
CD79A	1.34	0.24	0.29	0.48	0.095	0.25	1.78	0.23	0.31	1.91	0.093	0.15
IL3RA	1.67	1.1e-05	3.6e-05	1.2	0.38	0.56	2.32	6.5e-05	0.00068	1.57	0.02	0.042
PECAM1	1.91	0.00051	0.0011	2.35	0.0068	0.061	2.19	0.027	0.054	1.69	0.1	0.16
CD247	1.88	0.00016	0.0004	1.56	0.19	0.38	2.09	0.012	0.028	1.79	0.026	0.053
CD79B	1.59	0.0072	0.012	1.02	0.94	0.96	2.26	0.018	0.041	1.65	0.065	0.11
SIT1	1.79	0.0013	0.0025	1.36	0.37	0.54	1.87	0.055	0.1	1.94	0.023	0.048
EBI3	1.95	1.1e-06	5.1e-06	1.78	0.044	0.17	2.18	0.00041	0.0027	1.73	0.012	0.031
CXCR3	1.85	7.3e-06	2.6e-05	1.66	0.04	0.17	1.83	0.015	0.035	1.9	0.005	0.016
CXCL10	1.64	0.0045	0.0078	1.32	0.38	0.56	1.65	0.091	0.15	2.14	0.014	0.033
MRC1	2.03	8.7e-07	4.1e-06	1.69	0.1	0.26	2.32	0.00024	0.0018	1.66	0.012	0.03
CXCR2	2.15	2.7e-06	1.1e-05	2.08	0.0077	0.061	2.26	0.0062	0.018	1.66	0.069	0.11
PIK3CA	1.88	3.5e-15	1.8e-13	1.82	0.0025	0.032	1.9	1e-07	8.1e-06	1.91	4.6e-09	4.6e-07
ITGAE	1.85	5.5e-15	2.2e-13	1.66	0.00045	0.013	1.76	2.4e-06	5.9e-05	2.05	7.6e-07	2.5e-05
CTSS	1.73	3.4e-06	1.4e-05	1.24	0.24	0.42	1.82	0.0027	0.01	1.93	0.0027	0.01
JAML	2.12	1.3e-06	5.9e-06	1.74	0.066	0.21	2.32	0.00092	0.0045	1.67	0.036	0.071
GRAP2	2.2	2.2e-06	9.8e-06	2.31	0.0083	0.064	2.28	0.0061	0.018	1.63	0.059	0.1
FOXO1	2.08	1.6e-15	1.1e-13	2.24	7.8e-05	0.0052	2.1	2e-07	1.3e-05	1.84	1.8e-05	0.00032
LST1	2.15	2.3e-07	1.3e-06	2.26	0.0091	0.067	1.99	0.0068	0.02	1.99	0.0023	0.0094
CCL3	1.61	0.00076	0.0016	0.91	0.7	0.83	1.77	0.038	0.072	2.12	0.00084	0.0045
CD226	1.91	2.9e-07	1.7e-06	1.54	0.12	0.28	2.27	7.7e-05	0.00075	1.8	0.0017	0.0076
FYB	1.77	9e-06	3.2e-05	1.25	0.35	0.53	2.02	0.0031	0.011	1.9	0.0022	0.0091
IDO1	1.84	0.00052	0.0011	1.57	0.18	0.37	2.22	0.012	0.029	1.91	0.027	0.054
TWIST1	1.68	0.0026	0.0047	1.2	0.55	0.7	2.26	0.0083	0.022	1.8	0.048	0.087
IFIH1	1.71	1.8e-06	7.9e-06	1.44	0.12	0.29	1.7	0.0019	0.0074	2.13	3.2e-05	0.00042
CD209	1.92	2.8e-05	8.4e-05	1.65	0.085	0.24	2.16	0.00096	0.0046	1.78	0.034	0.068
TYROBP	1.86	3.3e-07	1.8e-06	1.45	0.14	0.31	1.95	0.00053	0.0033	2.12	0.00014	0.0012
IFIT1	1.99	4.1e-06	1.6e-05	2.38	0.018	0.11	2.32	6.4e-05	0.00068	1.82	0.0049	0.016
PDCD1LG2	1.68	0.00048	0.0011	1.06	0.84	0.92	1.94	0.0075	0.02	2.06	0.0021	0.0087
HLA_DOB	1.89	4.3e-05	0.00012	1.61	0.095	0.25	1.7	0.063	0.11	2.22	0.0024	0.0095
IFI44L	1.69	0.00036	0.00084	1.44	0.19	0.39	2.04	0.0034	0.012	1.93	0.0098	0.027
CEACAM1	2	9.6e-06	3.3e-05	2.14	0.0091	0.067	2.37	0.0013	0.0059	1.86	0.019	0.041
FCGR3B	2.38	3.2e-08	2.6e-07	2.64	0.00034	0.012	2.55	0.0029	0.01	1.74	0.024	0.051
CD3	1.82	0.00015	0.00037	1.23	0.49	0.66	2.09	0.0071	0.02	1.98	0.0078	0.022
PTPRC	1.8	0.0016	0.003	1.07	0.84	0.92	2.47	0.0073	0.02	1.73	0.072	0.12
CD28	2.06	2.1e-07	1.3e-06	1.78	0.033	0.15	2.39	0.00058	0.0035	1.82	0.0072	0.021
IGSF6	2.15	1.4e-06	6.3e-06	1.98	0.023	0.13	2.23	0.0013	0.0059	1.92	0.019	0.041
FASLG	2.14	1.5e-05	4.7e-05	1.8	0.077	0.23	1.71	0.077	0.13	2.34	0.0033	0.012
CLEC4C	1.72	0.0075	0.012	0.98	0.95	0.96	2.54	0.032	0.061	1.7	0.082	0.13
CD8	1.73	0.00013	0.00034	1.05	0.85	0.92	2.03	0.0037	0.013	2.11	0.0015	0.0073
GAGE10	1.79	3.4e-05	0.0001	1.31	0.31	0.49	2.24	0.007	0.02	2.1	0.00028	0.002
TBX21	1.89	0.00012	0.0003	1.07	0.83	0.92	1.96	0.021	0.043	2.23	0.0012	0.0062
CX3CL1	2.12	1.2e-11	2.6e-10	2.18	0.00063	0.016	2.15	2.4e-05	0.00032	2.13	4.3e-05	0.0005
CD38	2.24	2.4e-05	7.3e-05	2.12	0.044	0.17	2.57	0.0043	0.014	1.9	0.038	0.073
IL12B	1.95	3.4e-08	2.6e-07	1.45	0.046	0.18	2.29	0.00061	0.0035	2.07	0.0005	0.0032
IL2RG	2.24	5.6e-07	2.9e-06	2.08	0.034	0.15	2.07	0.0045	0.014	2.08	0.0034	0.012
EGR2	1.73	8.1e-05	0.00022	0.91	0.72	0.84	2.63	7.7e-05	0.00075	1.91	0.0051	0.017
CCR4	2.03	1.8e-05	5.8e-05	1.49	0.2	0.39	2.21	0.006	0.018	2.12	0.0058	0.018
IFNG	2.2	1.4e-06	6.5e-06	1.82	0.033	0.15	1.93	0.027	0.054	2.4	0.0013	0.0063
IL6	1.95	0.00011	0.00028	1.21	0.54	0.7	2.91	0.0012	0.0053	1.79	0.037	0.072
SKAP2	2.2	3.3e-16	2.7e-14	2.06	0.0003	0.012	2.46	2.8e-08	3.8e-06	2.01	4.2e-06	0.00012
LY9	2.11	1.4e-05	4.5e-05	1.54	0.15	0.34	2.05	0.031	0.059	2.22	0.0044	0.015
TNFSF4	2.16	5.7e-10	8.3e-09	2.02	0.0027	0.034	1.97	0.0027	0.01	2.39	2.5e-05	0.00037
IKZF4	2.32	1.6e-13	4.6e-12	2.3	0.00081	0.018	2.63	4.5e-07	1.7e-05	1.94	0.00012	0.0011
GZMA	2.15	1e-05	3.5e-05	1.61	0.17	0.36	2.03	0.007	0.02	2.44	0.0015	0.0071
CCR2	2	0.00042	0.00096	1.34	0.4	0.57	3.08	0.0012	0.0056	1.76	0.094	0.15
PRDM1	2.27	1.3e-09	1.5e-08	1.85	0.031	0.14	2.42	3e-05	0.00037	2.17	0.00024	0.0018
ENTPD1	2.07	2.1e-11	4.2e-10	1.66	0.024	0.13	1.9	4.9e-05	0.00055	2.59	5e-07	2e-05
IFIT3	2.04	3e-08	2.5e-07	1.95	0.011	0.079	2.4	1.8e-05	0.00025	2.19	0.00029	0.0021
IKZF3	2.2	3.1e-06	1.3e-05	1.5	0.21	0.4	2.83	0.00071	0.0038	1.97	0.01	0.027
HLA_DMB	2.25	0.00051	0.0011	1.8	0.15	0.34	1.88	0.16	0.23	2.68	0.011	0.029
TLR8	2.29	2.9e-08	2.5e-07	1.79	0.031	0.15	2.55	0.00031	0.0021	2.18	0.0019	0.0081
CD52	2.12	2.6e-07	1.5e-06	1.43	0.2	0.39	2.25	0.00093	0.0045	2.37	0.00035	0.0023
GZMB	2.11	7.1e-05	0.00019	1.45	0.29	0.48	2.52	0.0061	0.018	2.26	0.0071	0.021
CCL5	2.11	6.7e-07	3.4e-06	1.48	0.16	0.35	2.19	0.00085	0.0044	2.49	0.00043	0.0029
KLRD1	2.15	3.3e-07	1.8e-06	1.46	0.16	0.35	2.74	3.9e-05	0.00045	2.09	0.0059	0.018
CCL18	2.09	0.0012	0.0024	1.16	0.72	0.84	2.75	0.012	0.029	2.08	0.047	0.087
CCL4	2.26	2.9e-08	2.5e-07	1.65	0.089	0.24	2.2	0.0014	0.006	2.57	3.5e-05	0.00044
ID3	2.07	3.4e-08	2.6e-07	1.51	0.087	0.24	3.09	3.3e-07	1.4e-05	1.88	0.0061	0.018
MMP9	1.74	0.0059	0.0098	0.86	0.68	0.81	2.14	0.03	0.059	2.43	0.011	0.029
TNFRSF9	2.19	3.2e-06	1.3e-05	1.64	0.17	0.36	2.17	0.0024	0.009	2.56	0.00066	0.004
CD53	1.75	0.01	0.016	0.74	0.4	0.57	3.23	0.006	0.018	1.78	0.11	0.16
MMP2	1.8	0.0012	0.0024	0.97	0.93	0.96	2.42	0.0043	0.014	2.43	0.0075	0.022
CXCR5	2.11	6.2e-05	0.00017	1.33	0.38	0.56	2.48	0.017	0.039	2.35	0.0034	0.013
GPR18	2.41	1.2e-07	7.9e-07	1.93	0.036	0.16	1.65	0.1	0.16	3.25	6.3e-06	0.00015
BTLA	2.28	4.3e-07	2.3e-06	1.64	0.091	0.24	2.59	0.003	0.011	2.25	0.0017	0.0076
LAPTM5	2.33	4.7e-13	1.2e-11	1.91	0.0016	0.028	2.74	1.8e-06	4.7e-05	2.33	2.9e-05	0.0004
CCR7	2.24	2.2e-05	6.8e-05	1.55	0.2	0.39	2.87	0.0051	0.016	2.21	0.0081	0.023
KREMEN1	2.27	7.3e-14	2.2e-12	1.78	0.026	0.13	2.55	1e-07	8.1e-06	2.51	3.7e-09	4.6e-07
HGF	2.32	3.5e-08	2.6e-07	1.78	0.054	0.19	3.28	7e-06	0.00012	2.13	0.0026	0.01
TNFSF18	2.11	5e-07	2.6e-06	1.32	0.29	0.48	3.05	9.9e-05	0.00089	2.14	0.0018	0.0078
IL7R	2.49	9.1e-08	6.2e-07	1.87	0.063	0.21	3.11	0.00016	0.0013	2.12	0.0042	0.015
IRS1	2.67	2.5e-14	8.4e-13	2.71	0.00088	0.018	2.38	1e-05	0.00016	2.79	1e-07	6.6e-06
FCRLA	2.1	3.6e-05	0.00011	1.3	0.39	0.56	2	0.051	0.093	2.98	0.00023	0.0018
CXCR4	2.58	1.4e-14	4.9e-13	2.65	0.00038	0.012	2.62	4.9e-06	9.7e-05	2.54	2.6e-07	1.1e-05
ZEB1	2.24	5.2e-09	5.4e-08	1.62	0.051	0.19	3.47	4.8e-07	1.7e-05	2.02	0.0027	0.01
PTGS2	2.69	6.5e-10	8.9e-09	2.13	0.0045	0.047	4.34	4.1e-06	8.4e-05	1.89	0.013	0.032
CTLA4	2.52	6.5e-09	6.4e-08	1.94	0.025	0.13	2.84	0.00026	0.0019	2.43	0.00083	0.0045
CXCL9	2.05	0.0012	0.0024	1.12	0.76	0.87	2.03	0.059	0.11	3.16	0.0037	0.013
NT5E	2.24	9.8e-08	6.6e-07	1.75	0.052	0.19	3.53	6.2e-06	0.00011	2.21	0.0008	0.0045
KLRK1	2.44	3.9e-08	2.9e-07	1.68	0.079	0.24	2.41	0.0038	0.013	2.86	7.4e-05	0.00074
CD2	2.54	1e-07	6.8e-07	2	0.028	0.14	2.62	0.0024	0.009	2.65	0.00085	0.0045
CRTAM	2.55	4e-08	2.9e-07	1.78	0.073	0.23	1.99	0.021	0.044	3.5	6.4e-06	0.00015
MS4A1	2.21	0.00046	0.001	1.18	0.67	0.8	3.19	0.013	0.031	2.4	0.013	0.032
TNFSF13B	2.74	5e-15	2.2e-13	2.56	0.0005	0.013	2.47	5.7e-06	0.00011	2.89	2.5e-07	1.1e-05
CD8A	2.5	5.6e-09	5.6e-08	1.65	0.096	0.25	2.69	8.4e-05	0.00079	2.88	5.8e-05	0.0006
CD3G	2.47	1.4e-07	8.8e-07	1.64	0.12	0.28	2.52	0.0017	0.0069	2.99	0.00015	0.0012
SLAMF7	2.48	4.6e-06	1.8e-05	1.44	0.3	0.48	2.45	0.008	0.021	3.24	0.0005	0.0032
EGR3	2.71	8.1e-07	3.9e-06	1.85	0.094	0.25	3.29	0.00019	0.0015	2.63	0.0077	0.022
ICOS	2.5	5.2e-09	5.4e-08	1.68	0.06	0.2	2.52	0.0016	0.0068	3.11	2.1e-05	0.00034
TLR3	2.98	2.7e-15	1.5e-13	3.11	0.00029	0.012	2.08	2e-05	0.00028	3.7	1.5e-08	1.2e-06
TLR7	2.91	2.1e-12	5.3e-11	2.49	0.0042	0.045	3.15	2.9e-06	6.8e-05	2.83	2.9e-05	0.0004
TNFRSF17	2.48	3.8e-05	0.00011	1.34	0.45	0.62	3.02	0.0057	0.018	2.81	0.0061	0.018
CD40LG	2.93	2.7e-11	5.1e-10	2.47	0.002	0.031	3.23	9.4e-05	0.00086	2.74	0.00013	0.0011
CD69	2.89	5.8e-11	1e-09	2.46	0.0052	0.053	2.6	0.00065	0.0037	3.33	6.1e-06	0.00015
GZMK	2.73	1.3e-07	8e-07	1.79	0.085	0.24	2.94	0.00068	0.0038	3.05	0.00077	0.0044
CCR6	3.23	3e-16	2.7e-14	2.84	0.00027	0.012	3.59	6.1e-07	2e-05	2.55	1.3e-05	0.00027
SH2D1A	3.04	1.2e-09	1.4e-08	2.49	0.004	0.044	3.93	2.8e-05	0.00036	2.53	0.0032	0.012
TARP	2.75	8.6e-10	1.1e-08	1.87	0.027	0.13	2.99	0.00018	0.0014	3.18	5.6e-05	0.0006
SNAI2	2.7	1.3e-08	1.2e-07	1.94	0.044	0.17	3.98	3.7e-06	8.2e-05	2.57	0.0017	0.0076
ID2	3.05	1.6e-24	6.5e-22	2.43	6.7e-05	0.0052	3.55	4.3e-12	1.7e-09	2.96	4.7e-10	9.3e-08
KLRB1	2.98	8.7e-10	1.1e-08	2.03	0.043	0.17	3.26	5.3e-05	0.00059	3.12	0.00011	0.00097
CCR5	3	7.3e-12	1.7e-10	2.28	0.0077	0.061	3.67	8.4e-07	2.4e-05	2.99	5.6e-05	0.0006
CCL17	2.5	8.2e-07	3.9e-06	1.2	0.57	0.72	4.77	8.8e-06	0.00014	2.33	0.0041	0.014
PTEN	3.33	4e-24	7.9e-22	3.26	1.6e-05	0.0034	3.32	2e-10	4e-08	3.23	8.9e-12	3.5e-09
CCL21	2.6	0.00036	0.00083	1.29	0.6	0.74	4.83	0.0044	0.014	2.75	0.014	0.033
VCAM1	2.82	1.4e-10	2.2e-09	1.77	0.055	0.19	4.13	2.5e-07	1.3e-05	3.26	2.4e-05	0.00037
CXCR6	2.79	2.1e-08	1.9e-07	1.54	0.18	0.37	5.37	2.6e-07	1.3e-05	2.84	0.00066	0.004
CD1C	3.4	1e-09	1.3e-08	2.3	0.025	0.13	3.79	0.00042	0.0027	3.52	8.7e-05	0.00084
JCHAIN	2.87	2e-05	6.3e-05	1.35	0.49	0.66	4.22	0.00092	0.0045	3.37	0.0039	0.014
CXCL1	1.8	0.0016	0.0031	2.14	0.029	0.14	2.26	0.0094	0.024	1.15	0.67	0.74
NFKBIA	1.21	0.01	0.016	1.28	0.078	0.23	1.14	0.33	0.42	1.24	0.092	0.15
ITGAM	1.15	0.21	0.25	0.81	0.27	0.45	1.42	0.099	0.16	1.17	0.39	0.48
CX3CR1	1.27	0.041	0.058	1.14	0.54	0.7	1.67	0.012	0.029	1.12	0.55	0.63
GNLY	1.35	0.048	0.067	1.09	0.76	0.87	1.37	0.28	0.37	1.41	0.16	0.23
CA4	1.92	0.00063	0.0014	2.84	0.0015	0.027	1.45	0.35	0.44	1.67	0.092	0.15
IKZF2	1.3	0.0019	0.0035	1.51	0.027	0.13	0.97	0.8	0.85	1.37	0.015	0.035
ICOSLG	0.94	0.42	0.47	1.06	0.75	0.86	0.84	0.19	0.27	0.85	0.14	0.22
HLA_DQB2	1.36	0.066	0.09	0.93	0.83	0.92	0.9	0.73	0.79	2.1	0.0045	0.015
BST2	1.06	0.58	0.63	0.89	0.51	0.66	1.13	0.55	0.63	1.44	0.046	0.085
CTAG1B	0.54	0.014	0.021	0.43	0.036	0.16	0.42	0.11	0.17	0.66	0.31	0.4
ISG20	0.71	0.0028	0.005	0.56	0.0068	0.061	0.76	0.17	0.24	0.8	0.26	0.34
IRF4	1.18	0.47	0.52	0.47	0.062	0.2	1.89	0.13	0.2	1.4	0.38	0.47
LCK	0.91	0.53	0.58	1.25	0.31	0.49	1.16	0.61	0.69	0.54	0.0052	0.017
NCR3	1.42	0.022	0.032	1.2	0.49	0.66	1.55	0.12	0.19	1.24	0.39	0.48
STAT4	1.4	0.025	0.037	1.17	0.58	0.73	1.63	0.098	0.16	1.16	0.49	0.58
IRF1	1.08	0.37	0.42	0.88	0.39	0.56	1	0.99	0.99	1.41	0.016	0.036
CD27	1.28	0.21	0.26	0.75	0.41	0.58	1.5	0.25	0.34	1.47	0.23	0.31
C1QA	1.21	0.13	0.16	0.96	0.84	0.92	1.78	0.012	0.029	1.03	0.88	0.91
ALOX15B	1.56	0.0054	0.009	1.64	0.077	0.23	1.21	0.47	0.56	1.62	0.089	0.14
ZAP70	1.13	0.41	0.46	0.66	0.085	0.24	1.28	0.41	0.5	1.32	0.21	0.29
CD8B	1.18	0.32	0.37	0.78	0.44	0.61	1.4	0.26	0.34	1.36	0.26	0.34
SLAMF8	1.23	0.16	0.2	0.91	0.7	0.82	1.43	0.16	0.23	1.26	0.36	0.46
IFI27	1.12	0.37	0.42	1.03	0.91	0.95	1.03	0.89	0.91	1.51	0.048	0.087
VTCN1	1.71	0.012	0.018	2.18	0.044	0.17	1.96	0.061	0.11	1.23	0.58	0.66
POU2AF1	1.18	0.46	0.51	0.53	0.095	0.25	1.35	0.47	0.56	1.61	0.2	0.28
TP63	1.36	0.023	0.033	1.36	0.16	0.35	1.1	0.72	0.79	1.4	0.13	0.2
HLA_F_AS1	1.36	0.016	0.024	1.55	0.048	0.18	1.07	0.78	0.84	1.4	0.085	0.14
EFNA4	0.84	0.025	0.037	0.77	0.16	0.35	0.87	0.28	0.37	0.88	0.27	0.35
IL22	1.04	0.42	0.47	0.91	0.3	0.48	1.08	0.48	0.56	1.08	0.19	0.27
ITGB2	1.12	0.31	0.36	0.82	0.3	0.48	1.46	0.062	0.11	1.08	0.66	0.73
BATF	1.25	0.14	0.18	0.94	0.85	0.92	1.44	0.15	0.22	1.17	0.48	0.57
CD14	1.18	0.12	0.15	1.02	0.93	0.96	1.6	0.022	0.044	0.99	0.96	0.97
SSX2	0.72	0.052	0.071	0.59	0.051	0.19	0.7	0.22	0.3	0.74	0.32	0.42
CDKN2A	1.22	0.28	0.32	0.93	0.85	0.92	1.5	0.2	0.27	1.16	0.6	0.68
MIF	0.9	0.12	0.16	0.99	0.93	0.96	0.99	0.93	0.95	0.84	0.1	0.16
GAGE12J	1.1	0.62	0.66	0.56	0.053	0.19	1.31	0.49	0.57	1.46	0.22	0.3
IL4	1.08	0.15	0.19	1.04	0.69	0.81	1.16	0.18	0.25	1.07	0.52	0.61
IL13	1.16	0.14	0.18	1.05	0.77	0.88	1.07	0.73	0.79	1.29	0.15	0.22
CD22	1.56	0.017	0.026	1.83	0.09	0.24	1.59	0.17	0.24	1.14	0.65	0.73
IFI35	1.02	0.82	0.85	0.86	0.32	0.5	1.15	0.36	0.45	1.13	0.38	0.48
TOP2A	1.1	0.33	0.38	0.98	0.89	0.95	1.16	0.42	0.51	1.23	0.25	0.33
MLANA	0.97	0.7	0.74	0.79	0.16	0.35	1.15	0.42	0.51	1.06	0.27	0.35
MAGEA1	1.3	0.12	0.15	1.23	0.48	0.65	1.11	0.68	0.75	1.46	0.22	0.3
TNFRSF18	1.28	0.12	0.16	1.19	0.62	0.75	1.31	0.33	0.42	1.21	0.42	0.52
PGF	1.14	0.31	0.36	0.9	0.71	0.83	1.51	0.067	0.11	1.02	0.93	0.94
IFI6	1.03	0.79	0.82	0.95	0.81	0.9	1.68	0.019	0.041	0.95	0.79	0.84
TNFSF14	1.25	0.25	0.3	1	1	1	1.44	0.27	0.35	1.2	0.58	0.66
KIR2DL2	1.03	0.32	0.37	0.99	0.88	0.94	1.06	0.25	0.34	1.03	0.53	0.61
B3GAT1	1.17	0.41	0.46	1.05	0.91	0.95	1.64	0.11	0.17	1.07	0.81	0.86
CEACAM8	0.98	0.67	0.71	1.04	0.17	0.36	0.92	0.23	0.32	0.94	0.52	0.61
PTPRCAP	1.08	0.57	0.62	0.77	0.29	0.48	1.47	0.1	0.16	0.99	0.96	0.97
MKI67	1.2	0.18	0.22	1.32	0.32	0.5	1.04	0.85	0.88	1.31	0.25	0.34
NOTCH3	0.9	0.23	0.28	0.82	0.22	0.41	0.88	0.39	0.48	0.89	0.44	0.53
RORC	1.58	0.0028	0.005	2.94	0.0023	0.032	0.95	0.83	0.87	1.32	0.2	0.28
LRG1	1.33	0.083	0.11	1.57	0.21	0.4	1.16	0.61	0.69	1.26	0.36	0.46
S100A8	1.4	0.072	0.097	1.19	0.58	0.73	1.48	0.3	0.39	1.13	0.67	0.74
IFNB1	1.19	0.2	0.24	1.28	0.29	0.48	1.59	0.069	0.12	0.95	0.81	0.86
TNFSF9	0.76	0.059	0.08	0.54	0.024	0.13	1.07	0.8	0.85	0.73	0.22	0.3
IL2RB	1.06	0.71	0.75	0.76	0.33	0.51	1.2	0.48	0.56	1.17	0.5	0.58
MAGEA3	0.87	0.26	0.31	0.85	0.42	0.6	0.76	0.22	0.3	1.01	0.96	0.97
MAGEA12	0.93	0.32	0.37	0.95	0.66	0.8	0.86	0.18	0.26	0.96	0.76	0.81
HLA_E	1.04	0.58	0.63	0.94	0.65	0.79	1.13	0.43	0.51	1.1	0.42	0.52
IDO2	1.15	0.33	0.38	0.96	0.87	0.93	1.49	0.12	0.18	0.99	0.96	0.97
MAGEA10	0.9	0.64	0.68	0.98	0.94	0.96	0.44	0.11	0.17	1.07	0.83	0.87
KIR2DL3	1.29	0.014	0.022	1.46	0.015	0.099	1.1	0.63	0.7	1.17	0.39	0.48
ZBTB46	1.02	0.81	0.84	1.33	0.22	0.41	0.83	0.2	0.28	0.93	0.61	0.69
CCL20	1.29	0.17	0.21	1.61	0.24	0.42	0.96	0.89	0.92	1.38	0.26	0.35
AKT1	0.88	0.041	0.058	0.83	0.11	0.27	0.84	0.15	0.22	1.02	0.83	0.87
LILRB1	1.02	0.88	0.9	0.69	0.13	0.29	1.5	0.15	0.22	0.98	0.91	0.94
ARG1	1.1	0.42	0.47	1.06	0.85	0.92	1.27	0.22	0.3	1.06	0.75	0.81
GAGE1_GAGE12I_GAGE12F	0.89	0.69	0.73	0.27	0.0029	0.034	1.43	0.54	0.62	1.34	0.53	0.61
PMEL	1.34	0.011	0.018	1.87	0.0085	0.065	1.31	0.16	0.24	1	0.98	0.99
MX1	0.94	0.61	0.65	0.81	0.32	0.5	1.15	0.55	0.63	1.09	0.66	0.73
S100A9	1.29	0.14	0.18	1.19	0.57	0.72	1.36	0.39	0.48	1.04	0.88	0.91
KIAA0101	1.13	0.26	0.31	1.3	0.23	0.41	1.04	0.82	0.87	1.12	0.51	0.6
MAGEA4	1.03	0.9	0.91	0.56	0.23	0.42	1.03	0.95	0.96	1.44	0.39	0.48
NCR1	1.14	0.33	0.38	0.9	0.67	0.8	1.32	0.25	0.33	1.04	0.87	0.91
LMNA	0.88	0.081	0.11	0.75	0.027	0.13	0.88	0.39	0.48	0.97	0.79	0.84
CCNB2	1.32	0.022	0.033	1.98	0.027	0.13	0.98	0.91	0.93	1.23	0.19	0.27
HLA_G	0.85	0.36	0.41	0.84	0.58	0.73	1.01	0.97	0.98	0.75	0.35	0.44
KIR2DL1	1.03	0.31	0.36	1	0.91	0.95	1	0.98	0.99	1.05	0.37	0.47
CORO1A	0.92	0.48	0.53	0.85	0.48	0.65	1.01	0.96	0.97	0.83	0.26	0.35
CD19	1	0.99	0.99	0.58	0.085	0.24	1.8	0.14	0.21	0.83	0.54	0.63
CXCL8	1.3	0.13	0.17	1.43	0.26	0.44	1.21	0.53	0.61	1.15	0.66	0.74
NECTIN2	1.11	0.26	0.31	1.18	0.36	0.53	1.09	0.57	0.65	1.08	0.62	0.69
HLA_DRB1	1.73	0.051	0.071	3.63	0.0039	0.044	1.01	0.98	0.99	1.56	0.38	0.47
NCF1	1	0.99	0.99	0.66	0.096	0.25	1.33	0.26	0.34	0.96	0.84	0.88
G6PD	1	0.96	0.97	1.08	0.65	0.78	1.05	0.6	0.68	0.89	0.26	0.35
MADCAM1	0.97	0.84	0.86	1.07	0.75	0.86	0.84	0.51	0.6	0.98	0.92	0.94
GATA3	1.18	0.26	0.31	1.06	0.84	0.92	1.06	0.82	0.87	1.22	0.36	0.46
IFNA17	0.99	0.94	0.96	0.73	0.27	0.46	1.76	0.064	0.11	0.82	0.43	0.52
PVR	1.02	0.83	0.86	0.93	0.59	0.73	1.08	0.47	0.56	1.05	0.71	0.77
KRT7	1.1	0.5	0.55	1.54	0.13	0.3	1.11	0.67	0.74	0.81	0.35	0.45
FOXM1	1.13	0.28	0.33	1.34	0.26	0.44	0.94	0.72	0.79	1.17	0.4	0.49
POLR2A	1	0.98	0.98	0.85	0.17	0.35	0.98	0.88	0.91	1.17	0.15	0.22
TUBB	1.07	0.21	0.25	1.13	0.28	0.47	1.08	0.48	0.57	1	0.97	0.97
HLA_DPA1	1.45	0.19	0.24	1.71	0.3	0.48	1.25	0.72	0.78	1.33	0.51	0.59
CD44	1.43	0.0075	0.012	1.87	0.0025	0.032	0.76	0.29	0.37	1.51	0.069	0.11
MTOR	0.98	0.73	0.77	0.98	0.86	0.93	0.99	0.96	0.97	0.91	0.24	0.33
OAS3	0.99	0.95	0.96	1.01	0.96	0.97	1.04	0.82	0.86	1.08	0.67	0.74
DMBT1	1.53	0.07	0.095	3.28	0.0054	0.054	0.57	0.16	0.23	2.05	0.07	0.12
LCN2	1.29	0.16	0.2	3.01	0.00035	0.012	0.93	0.83	0.87	0.95	0.87	0.9
VEGFA	0.88	0.2	0.25	0.79	0.21	0.4	0.84	0.37	0.46	1.04	0.81	0.86
BAGE	1.01	0.96	0.97	0.67	0.3	0.48	1.87	0.16	0.24	0.77	0.48	0.57
HLA_B	0.91	0.78	0.82	0.85	0.79	0.89	0.78	0.68	0.75	1	0.99	0.99
MAGEC2	0.77	0.27	0.31	0.38	0.034	0.15	0.9	0.8	0.85	1.28	0.51	0.6
GAGE2C_GAGE2A_GAGE2E	0.62	0.083	0.11	0.23	0.0024	0.032	0.71	0.56	0.63	0.95	0.9	0.93
NOS2	1.24	0.12	0.15	1.49	0.082	0.24	1.07	0.75	0.81	1.09	0.72	0.79
CD1D	1.12	0.41	0.46	1.21	0.46	0.64	1.44	0.095	0.15	0.69	0.098	0.15
GAGE13	0.83	0.15	0.18	0.57	0.013	0.091	0.82	0.45	0.54	1.06	0.77	0.83
KRT5	1.13	0.58	0.63	1.45	0.38	0.56	0.84	0.67	0.74	0.96	0.92	0.94
TNFRSF4	0.97	0.79	0.82	0.99	0.95	0.96	0.95	0.83	0.87	0.94	0.79	0.84
CTAG2	0.91	0.46	0.51	0.64	0.051	0.19	1.07	0.73	0.79	1.07	0.77	0.83
HLA_A	1.14	0.78	0.81	1.84	0.48	0.65	0.85	0.85	0.88	0.9	0.89	0.92
XAGE1B	0.86	0.53	0.58	0.4	0.0075	0.061	1.51	0.34	0.43	0.85	0.71	0.77
IL17A	1.07	0.26	0.31	1.21	0.044	0.17	1.09	0.22	0.3	0.91	0.46	0.54
STAT6	0.98	0.69	0.73	0.93	0.54	0.7	0.99	0.96	0.97	1.04	0.71	0.77
PIK3CD	0.98	0.78	0.82	0.85	0.28	0.47	1.12	0.49	0.57	0.91	0.45	0.54
MPO	1.03	0.84	0.87	0.88	0.6	0.74	1.15	0.61	0.69	0.91	0.73	0.79
TRIM29	1.22	0.26	0.31	1.73	0.11	0.27	0.89	0.71	0.77	1.15	0.62	0.7
LEXM	1.08	0.61	0.66	1.45	0.18	0.37	0.59	0.063	0.11	1.42	0.18	0.26
ISG15	0.86	0.19	0.23	0.75	0.23	0.41	1.2	0.37	0.46	0.89	0.55	0.63
BRCA1	0.98	0.87	0.89	0.85	0.5	0.66	1.11	0.5	0.59	0.93	0.66	0.73
