# Supplementary material for: RB1 expression and HR proficiency define a poor-outcome molecular subtype of high grade serous ovarian carcinoma
Source: Research Square preprint supplement (doi:10.21203/rs.3.rs-5523163/v1), 2025-07-14
Supplement: Supplementary file 5 [file 596421392ea42cd1d47e8e1f.xlsx]

## Sheet: Sheet1
Supplemental Table 3. Molecular characteristics and gene expression differences in BRCAa, NBHRa, and HRi HGSOC cases evaluated by OmniSeq CGIP.
	All patients		BRCAa		NBHRa		HRi		BRCAa vs NBHRa		BRCAa vs HRi		NBHRa vs HRi
Variable	N	Frequency	N	Frequency	N	Frequency	N	Frequency	OR	P	OR	P	OR	P
Total number of patients	406		128		114		164
Age (Mean±SD)	406	68±10.4	128	64.5±10.9	114	70.7±9.3	164	68.8±10.2	-	0.0016	-	0.0015	-	0.62
% neoplastic nuclei of tumor (Mean±SD)	406	65.1±18.5	128	71.7±17.7	114	63±18	164	61.4±18.1	-	0.33	-	1.5e-05	-	0.96
Days from tissue collection to order date (Mean±SD)	406	376.1±580.7	128	518.1±728.1	114	210.5±369.8	164	380.3±543.2	-	0.45	-	0.18	-	0.49
NGS assay (N & %)	406		128		114		164
OmniSeq INSIGHT		219 (53.9%)		44 (34.4%)		105 (92.1%)		70 (42.7%)	-	-	-	-	-	-
OmniSeq Advance		97 (23.9%)		40 (31.3%)		1 (0.9%)		56 (34.1%)	-	-	-	-	-	-
OmniSeq Complete		64 (15.8%)		30 (23.4%)		6 (5.3%)		28 (17.1%)	-	-	-	-	-	-
OmniSeq Immune Report Card		26 (6.4%)		14 (10.9%)		2 (1.8%)		10 (6.1%)	-	-	-	-	-	-
TMB mutations/Mb (Mean±SD)	339	6.4±38.9	97	12.1±72.5	108	4.4±2.4	134	3.9±2.3	-	0.0052	-	0.0059	-	0.0022
TMB high/not high (N & %)	339		97		108		134
High (≥10)		12 (3.5%)		7 (7.2%)		4 (3.7%)		1 (0.7%)
Not high (<10)		327 (96.5%)		90 (92.8%)		104 (96.3%)		133 (99.3%)	0.22 [0.06-0.74]	0.014	0.11 [0.01-0.53]	0.0043	0.47 [0.04-2.66]	0.41
PD-L1 TPS score (Mean±SD)	341	3.3±8.6	98	4.2±9.6	107	2.8±8.8	136	3.1±7.6	-	0.16	-	0.3	-	0.69
PD-L1 negative/positive (N & %)	341		98		107		136
Negative		194 (56.9%)		51 (52%)		67 (62.6%)		76 (55.9%)
Positive (≥1)		147 (43.1%)		47 (48%)		40 (37.4%)		60 (44.1%)	0.78 [0.39-1.54]	0.46	0.87 [0.51-1.47]	0.6	0.89 [0.48-1.63]	0.71
TIGS score (Mean±SD)	332	45.1±20.2	93	40.8±17.7	106	47.2±19.6	133	46.5±21.8	-	0.48	-	0.033	-	0.17
TIGS strong/moderate/weak (N & %)	332		93		106		133
Strong		81 (24.4%)		13 (14%)		27 (25.5%)		41 (30.8%)	1.22 [0.54-2.86]	0.64	2.79 [1.43-5.75]	0.0022	0.96 [0.49-1.89]	0.92
Moderate		93 (28%)		27 (29%)		35 (33%)		31 (23.3%)	1.1 [0.53-2.31]	0.8	0.72 [0.39-1.32]	0.29	0.66 [0.34-1.28]	0.22
Weak		158 (47.6%)		53 (57%)		44 (41.5%)		61 (45.9%)	0.78 [0.4-1.56]	0.49	0.64 [0.37-1.09]	0.1	1.45 [0.8-2.64]	0.22
CP score (Mean±SD)	332	48.6±23.5	93	51.8±23.3	106	51.2±22.3	133	44.4±24	-	0.71	-	0.036	-	0.13
CP high/moderate/poor (N & %)	332		93		106		133
High		91 (27.4%)		30 (32.3%)		30 (28.3%)		31 (23.3%)	1.06 [0.5-2.3]	0.88	0.66 [0.37-1.2]	0.18	0.81 [0.41-1.57]	0.53
Moderate		144 (43.4%)		40 (43%)		49 (46.2%)		55 (41.4%)	1.09 [0.55-2.17]	0.81	0.94 [0.55-1.61]	0.83	0.93 [0.51-1.68]	0.81
Poor		97 (29.2%)		23 (24.7%)		27 (25.5%)		47 (35.3%)	0.82 [0.39-1.79]	0.62	1.58 [0.88-2.88]	0.13	1.35 [0.7-2.6]	0.37
CTAB score (Mean±SD)	332	321.2±233.3	93	285.2±225	106	357.5±233.2	133	317.4±236.5	-	0.067	-	0.014	-	0.53
CTAB high/low (N & %)	332		93		106		133
High		230 (69.3%)		58 (62.4%)		82 (77.4%)		90 (67.7%)
Low		102 (30.7%)		35 (37.6%)		24 (22.6%)		43 (32.3%)	2.6 [1.24-5.46]	0.011	1.31 [0.75-2.29]	0.34	0.6 [0.31-1.17]	0.14
RB1 nRPM (Mean±SD)	332	1186.4±885.1	93	1012±778	106	1312.1±941.8	133	1208.1±895.8	-	0.14	-	0.0058	-	0.73
BRCA1 nRPM (Mean±SD)	332	175.8±130.6	93	175.3±140.5	106	181.7±126	133	171.5±127.8	-	0.89	-	0.43	-	0.67
BRCA2 nRPM (Mean±SD)	332	210.3±169.4	93	196±138.5	106	200.1±139.3	133	228.5±206.4	-	0.16	-	0.11	-	0.76
CD3 nRPM (Mean±SD)	332	402.4±516.4	93	309.6±326	106	447±509.3	133	431.7±616.2	-	0.84	-	0.097	-	0.056
CD68 nRPM (Mean±SD)	332	2603.7±2390.8	93	1989.2±1602.5	106	2790.7±2311.4	133	2884.3±2814.4	-	0.84	-	0.025	-	0.76
CD20 nRPM (Mean±SD)	330	69±221.9	92	61.4±276.7	106	99±275.2	132	50.1±93.1	-	0.93	-	0.081	-	0.27
PTEN nRPM (Mean±SD)	332	2365.8±1932.9	93	2151.1±1929.8	106	2301.1±1857.4	133	2567.5±1988	-	0.47	-	0.019	-	0.27
MKI67 nRPM (Mean±SD)	332	1122.8±1064.5	93	1254.7±1203.4	106	1200.9±1160.1	133	968.2±848.8	-	0.57	-	0.21	-	0.072
