# Supplementary material for: RB1 expression and HR proficiency define a poor-outcome molecular subtype of high grade serous ovarian carcinoma
Source: Research Square preprint supplement (doi:10.21203/rs.3.rs-5523163/v1), 2025-07-14
Supplement: Supplementary file 6 [file 7caa735132283a11083ebbe6.xlsx]

## Sheet: TCGA Demographics Final
		Supplemental Table 1. Demographics, survival and molecular characteristics observed in cases from the Ovarian Serous Cystadenocarcinoma TCGA PanCancer Atlas.
			Median Values		Comparison (p)	Median Values				Comparisons (p)
			HRP	HRD	HRP vs HRD	HRP-RB1-Low	HRP-RB1-High	HRD-RB1-Low	HRD-RB1-High	HRP Groups (RB1-High vs RB1-Low)	HRD Groups (RB1-High vs RB1-Low)	RB1-High Groups (HRP vs HRD)	RB1-Low Groups (HRP vs HRD)	HRP-RB1-High vs HRD-RB1-Low	HRP-RB1-Low vs HRD-RB1-High
		Sample Size (n)	150	122	-	30	120	38	84	-	-	-	-	-	-
		Age (y)	60	55.5	0.0002	59.5	60	56	55	0.7797	0.8277	0.0006	0.1349	0.0387	0.0614
		OS (months)	36.3	53.3	<0.0001	52	35.9	57.1	53.3	0.0148	0.7791	<0.0001	0.5558	0.0017	0.4662
		PFS (months)	16	20.2	0.002	20.6	15.1	20.2	20.4	0.0313	0.9542	0.0007	0.8327	0.0128	0.6713
		LOH Score	8	18	<0.0001	10	7	19	18	0.03	0.0624	<0.0001	<0.0001	<0.0001	<0.0001
		LST Score	17.5	30	<0.0001	22	17	29.5	30	0.0023	0.4755	<0.0001	<0.0001	<0.0001	<0.0001
		TAI Score	21	29	<0.0001	21	21	28	29	0.5856	0.109	<0.0001	<0.0001	<0.0001	<0.0001
		HRD Score (cutoff ≥63 = HRD)	48	77	<0.0001	54.5	47	78	75.5	0.0016	0.4184	<0.0001	<0.0001	<0.0001	<0.0001
		Aneuploidy Score	17	10	<0.0001	10.5	18	9	10.5	0.0013	0.2455	<0.0001	0.3249	<0.0001	0.7298
		TMB (mut/Mb)	1.5	2.2	0.0019	1.3	1.5	1.8	2.3	0.8483	0.0528	0.0003	0.7277	0.6634	0.0161
		RB1 mRNA Expression (nTPM)	983	884	0.0145	523	1100	479	1070	<0.0001	<0.0001	0.195	0.818	<0.0001	<0.0001
		Ki-67 mRNA Expression (nTPM)	2191	2253	0.7255	3135	2082	2277	2210	0.0078	0.3825	0.4595	0.1779	0.1719	0.028
		*statistically significant p-values highlighted in red
