# Supplementary material for: RB1 expression and HR proficiency define a poor-outcome molecular subtype of high grade serous ovarian carcinoma
Source: Research Square preprint supplement (doi:10.21203/rs.3.rs-5523163/v1), 2025-07-14
Supplement: Supplementary file 7 [file 952c9a91fd2e41d9c052d6b4.xlsx]

## Sheet: Sheet1
RB1 high	Supplemental Table 10. Complete list of gene expression comparisons of RBH HGSOC evaluated by OmniSeq CGIP.
	Group 1 (BRCAa) vs Group 2 (NBHRa)			Group 1 (BRCAa) vs Group 3 (HRi)			Group 2 (NBHRa) vs Group 3 (HRi)														OR		Difference between groups in gene expression (normalized reads per million, nRPM) was significant at uncorrected P < 0.05 and multiple testing corrected false discovery rate (FDR) < 0.25
Gene	Estimated fold change	P	FDR	Estimated fold change	P	FDR	Estimated fold change	P	FDR												OR		Difference between groups in gene expression (normalized reads per million, nRPM) was not significant but may still be of interest to note as it reached uncorrected P < 0.05
ABCF1	1.07	0.42	0.93	0.98	0.68	0.78	0.97	0.59	0.91
ADGRE5	1.05	0.74	0.99	1.1	0.35	0.51	0.97	0.79	0.97
ADORA2A	1.17	0.32	0.93	1.27	0.076	0.25	0.86	0.28	0.87											Volcano plot legend
AIF1	1.32	0.15	0.83	1.43	0.032	0.2	0.86	0.31	0.87
AKT1	0.96	0.76	0.99	0.92	0.39	0.54	1.03	0.76	0.95													Diamond, colored points = Difference between groups in gene expression (normalized reads per million, nRPM) was significant at uncorrected P < 0.05 and multiple testing corrected false discovery rate (FDR) < 0.25
ALOX15B	1.39	0.24	0.89	1.3	0.3	0.46	0.93	0.79	0.97
ARG1	1.19	0.5	0.96	1.08	0.68	0.78	1.24	0.22	0.87
AXL	1.14	0.41	0.93	1.2	0.17	0.33	0.84	0.21	0.87													Circle, colored points = Difference between groups in gene expression (normalized reads per million, nRPM) was not significant but may still be of interest to note as it reached uncorrected P < 0.05
B3GAT1	1.1	0.79	0.99	0.79	0.43	0.59	0.75	0.27	0.87
BAGE	2.89	0.021	0.57	1.29	0.41	0.56	0.53	0.076	0.87
BATF	1.28	0.38	0.93	1.79	0.014	0.15	0.87	0.51	0.91													Grey points = Association with gene's expression resulted in P >= 0.05
BCL2	1.24	0.25	0.89	1.26	0.14	0.31	1.07	0.67	0.92
BCL2L11	1.08	0.48	0.96	1.13	0.12	0.29	1.12	0.18	0.87
BCL6	1.01	0.96	0.99	1.02	0.85	0.9	1.17	0.17	0.87
BRCA1	1.35	0.066	0.64	1.19	0.25	0.42	0.85	0.23	0.87
BRCA2	0.99	0.94	0.99	1.14	0.25	0.42	1.09	0.46	0.88
BST2	0.72	0.1	0.73	0.82	0.21	0.38	1.25	0.16	0.87
BTLA	1.38	0.31	0.93	1.56	0.063	0.23	0.76	0.27	0.87
BUB1	1.11	0.54	0.98	0.85	0.27	0.44	0.89	0.44	0.88
C10orf54	1.17	0.34	0.93	1.2	0.14	0.31	0.98	0.85	0.97
C1QA	1.08	0.72	0.99	1.23	0.26	0.43	0.66	0.021	0.87
C1QB	0.99	0.98	0.99	1.18	0.37	0.53	0.75	0.11	0.87
CA4	0.85	0.65	0.99	0.82	0.49	0.63	1.03	0.91	0.99
CBLB	1.32	0.094	0.7	1.17	0.21	0.38	0.91	0.47	0.88
CCL17	2.12	0.031	0.57	1.54	0.13	0.31	0.43	0.0027	0.36
CCL18	1.16	0.72	0.99	2.74	0.0047	0.12	1.01	0.97	1
CCL2	1.13	0.54	0.98	1.75	0.003	0.12	1.18	0.36	0.88
CCL20	0.81	0.57	0.98	0.82	0.48	0.62	1.18	0.54	0.91
CCL21	2.45	0.11	0.73	1.97	0.088	0.26	1.06	0.88	0.98
CCL22	1.8	0.13	0.78	2.19	0.006	0.12	0.71	0.22	0.87
CCL3	1.05	0.84	0.99	1.93	0.0013	0.12	1	1	1
CCL4	0.95	0.85	0.99	1.88	0.0053	0.12	1.07	0.72	0.93
CCL5	1.01	0.98	0.99	1.59	0.061	0.23	0.9	0.64	0.92
CCNB2	0.91	0.6	0.99	0.72	0.038	0.2	0.87	0.34	0.88
CCR1	1.01	0.96	0.99	1.3	0.16	0.33	0.89	0.53	0.91
CCR2	0.99	0.98	0.99	1.59	0.15	0.32	0.71	0.27	0.87
CCR4	1.22	0.5	0.96	1.5	0.11	0.29	0.78	0.3	0.87
CCR5	1.01	0.95	0.99	1.4	0.14	0.31	0.81	0.31	0.87
CCR6	1.31	0.26	0.9	1.39	0.11	0.28	0.74	0.12	0.87
CCR7	1.41	0.36	0.93	1.52	0.13	0.31	0.75	0.33	0.87
CD14	1.21	0.35	0.93	1.18	0.26	0.43	0.74	0.048	0.87
CD160	0.92	0.78	0.99	1.68	0.023	0.19	1.01	0.96	1
CD163	1.18	0.46	0.94	1.29	0.14	0.31	0.76	0.11	0.87
CD19	1.25	0.56	0.98	1.64	0.11	0.28	0.56	0.073	0.87
CD1C	1.7	0.18	0.87	1.96	0.033	0.2	1.07	0.83	0.97
CD1D	1.77	0.012	0.47	1.35	0.14	0.31	0.7	0.054	0.87
CD2	0.99	0.99	0.99	1.34	0.29	0.45	0.75	0.3	0.87
CD209	1.01	0.95	0.99	1.12	0.65	0.75	0.53	0.0066	0.65
CD22	1.71	0.11	0.73	1.07	0.82	0.88	0.92	0.76	0.95
CD226	1.28	0.27	0.91	1.5	0.032	0.2	0.91	0.56	0.91
CD244	1.25	0.41	0.93	1.63	0.037	0.2	0.9	0.66	0.92
CD247	1.17	0.59	0.99	1.51	0.092	0.26	0.85	0.46	0.88
CD27	1.21	0.61	0.99	1.93	0.038	0.2	0.77	0.39	0.88
CD274	0.98	0.94	0.99	1.61	0.013	0.15	1.14	0.46	0.88
CD276	1.29	0.061	0.64	1.16	0.14	0.31	0.91	0.34	0.88
CD28	1.23	0.38	0.93	1.39	0.091	0.26	0.82	0.3	0.87
CD3	1.11	0.73	0.99	1.58	0.073	0.24	0.76	0.24	0.87
CD33	1.18	0.42	0.93	1.32	0.083	0.26	0.87	0.41	0.88
CD37	1.24	0.39	0.93	1.33	0.16	0.33	0.73	0.12	0.87
CD38	0.85	0.64	0.99	1.33	0.36	0.52	0.73	0.28	0.87
CD3D	1.11	0.75	0.99	1.6	0.12	0.29	0.67	0.13	0.87
CD3E	1.09	0.79	0.99	1.62	0.085	0.26	0.74	0.24	0.87
CD3G	1.11	0.72	0.99	1.58	0.076	0.25	0.78	0.31	0.87
CD4	1.1	0.64	0.99	1.19	0.28	0.44	0.82	0.23	0.87
CD40	1.13	0.5	0.96	1.2	0.17	0.34	0.88	0.34	0.88
CD40LG	1.15	0.65	0.99	1.24	0.37	0.53	0.72	0.18	0.87
CD44	0.97	0.91	0.99	1.52	0.05	0.22	1.41	0.11	0.87
CD47	1.3	0.07	0.64	0.99	0.97	0.98	0.93	0.59	0.91
CD48	1.18	0.53	0.98	1.65	0.034	0.2	0.9	0.59	0.91
CD52	1.34	0.27	0.9	1.84	0.0099	0.15	0.99	0.96	1
CD53	1.6	0.25	0.89	2.07	0.029	0.2	0.67	0.24	0.87
CD6	1.12	0.65	0.99	1.44	0.073	0.24	0.86	0.48	0.89
CD63	1.02	0.82	0.99	1.1	0.23	0.4	1.05	0.6	0.91
CD68	1.09	0.63	0.99	1.47	0.02	0.18	0.92	0.61	0.91
CD69	1.1	0.74	0.99	1.28	0.28	0.44	1.05	0.84	0.97
CD70	0.94	0.83	0.99	1.4	0.16	0.33	0.81	0.39	0.88
CD74	0.96	0.86	0.99	1.04	0.83	0.88	0.9	0.56	0.91
CD79A	1.19	0.72	0.99	3.46	0.0013	0.12	1.04	0.92	0.99
CD79B	0.96	0.89	0.99	1.42	0.18	0.35	0.76	0.3	0.87
CD8	0.95	0.85	0.99	1.56	0.058	0.22	0.83	0.4	0.88
CD80	1.02	0.94	0.99	1.32	0.17	0.33	0.83	0.3	0.87
CD83	1	0.99	0.99	1.28	0.086	0.26	1	0.97	1
CD86	1.04	0.87	0.99	1.33	0.17	0.34	0.9	0.59	0.91
CD8A	0.98	0.95	0.99	1.68	0.035	0.2	0.85	0.46	0.88
CD8B	1.01	0.98	0.99	1.38	0.22	0.39	0.73	0.22	0.87
CDK1	0.95	0.8	0.99	0.82	0.21	0.38	0.89	0.45	0.88
CDKN2A	1.01	0.97	0.99	1.39	0.22	0.39	1.21	0.45	0.88
CDKN3	0.85	0.43	0.93	0.86	0.32	0.48	1.02	0.92	0.99
CEACAM1	0.64	0.097	0.7	0.83	0.44	0.59	1.09	0.71	0.93
CEACAM8	1.04	0.48	0.96	1.06	0.3	0.46	0.99	0.87	0.98
CIITA	0.97	0.87	0.99	1	0.98	0.99	0.96	0.84	0.97
CLEC4C	1.47	0.37	0.93	1.75	0.062	0.23	0.73	0.34	0.88
CMKLR1	1.54	0.098	0.7	1.41	0.1	0.27	0.82	0.36	0.88
CORO1A	1.18	0.44	0.93	1.21	0.22	0.39	0.82	0.23	0.87
CRTAM	1.27	0.44	0.93	1.91	0.0082	0.13	1.08	0.76	0.95
CSF1R	1.32	0.16	0.85	1.25	0.12	0.29	0.77	0.081	0.87
CSF2RB	1.29	0.25	0.89	1.66	0.013	0.15	0.8	0.26	0.87
CTAG1B	2.27	0.071	0.64	1.33	0.37	0.53	0.82	0.59	0.91
CTAG2	1.34	0.16	0.85	1.39	0.12	0.29	1.13	0.6	0.91
CTLA4	1.05	0.85	0.99	1.51	0.088	0.26	0.87	0.55	0.91
CTSS	1.13	0.57	0.98	1.4	0.065	0.23	0.83	0.3	0.87
CX3CL1	0.92	0.64	0.99	0.94	0.66	0.76	1.04	0.81	0.97
CX3CR1	1.23	0.34	0.93	1.11	0.56	0.69	1.1	0.62	0.92
CXCL1	1.3	0.43	0.93	1.06	0.84	0.89	0.89	0.68	0.92
CXCL10	0.73	0.32	0.93	0.94	0.81	0.88	0.87	0.57	0.91
CXCL11	0.65	0.23	0.87	0.8	0.5	0.64	0.72	0.28	0.87
CXCL13	1.27	0.54	0.98	1.38	0.34	0.5	0.55	0.063	0.87
CXCL8	1.26	0.45	0.94	1.24	0.43	0.59	1.05	0.86	0.97
CXCL9	1.09	0.82	0.99	1.47	0.27	0.44	0.7	0.3	0.87
CXCR2	1.47	0.2	0.87	1.62	0.061	0.23	1.03	0.9	0.99
CXCR3	0.77	0.35	0.93	1.12	0.62	0.73	0.83	0.39	0.88
CXCR4	0.98	0.91	0.99	0.97	0.81	0.88	1.22	0.21	0.87
CXCR5	1.18	0.68	0.99	1.61	0.098	0.27	0.85	0.6	0.91
CXCR6	0.9	0.73	0.99	1.52	0.14	0.31	0.81	0.42	0.88
CYBB	1.29	0.21	0.87	1.41	0.041	0.2	0.84	0.29	0.87
DDX58	0.72	0.07	0.64	0.81	0.13	0.31	1.04	0.73	0.93
DGAT2	0.84	0.47	0.95	1.02	0.9	0.93	1.16	0.4	0.88
DMBT1	0.2	0.00025	0.1	0.78	0.51	0.65	3.38	0.00077	0.3
EBI3	0.98	0.91	0.99	1.35	0.14	0.31	0.95	0.79	0.97
EFNA4	1.07	0.62	0.99	0.98	0.83	0.88	0.92	0.44	0.88
EGFR	1.09	0.57	0.98	0.96	0.75	0.84	0.97	0.82	0.97
EGR2	1.6	0.052	0.64	1.99	0.0017	0.12	0.96	0.86	0.97
EGR3	1.33	0.36	0.93	2.27	0.0076	0.13	1.27	0.43	0.88
EIF2AK2	0.83	0.13	0.78	0.87	0.13	0.31	0.98	0.86	0.97
ENTPD1	1.02	0.87	0.99	1.21	0.11	0.28	0.92	0.48	0.89
EOMES	1.52	0.19	0.87	2.32	0.0012	0.12	0.86	0.55	0.91
FAS	1.12	0.49	0.96	1.3	0.062	0.23	1	0.97	1
FASLG	1.12	0.74	0.99	1.76	0.039	0.2	0.88	0.62	0.92
FCER1G	1.16	0.41	0.93	1.33	0.062	0.23	0.91	0.56	0.91
FCGR1A	0.97	0.87	0.99	1	0.98	0.99	0.67	0.044	0.87
FCGR2B	1.01	0.96	0.99	1.43	0.16	0.33	0.71	0.14	0.87
FCGR3A	0.97	0.87	0.99	1.12	0.56	0.69	0.79	0.23	0.87
FCGR3B	1.06	0.85	0.99	1.37	0.18	0.34	0.87	0.55	0.91
FCRLA	0.89	0.76	0.99	1.64	0.09	0.26	1.14	0.67	0.92
FOXM1	0.99	0.94	0.99	0.73	0.053	0.22	0.78	0.12	0.87
FOXO1	1.07	0.63	0.99	1.11	0.39	0.55	0.99	0.93	1
FOXP3	1.5	0.094	0.7	1.13	0.59	0.71	0.58	0.011	0.87
FUT4	0.87	0.31	0.93	1.2	0.17	0.33	1.05	0.72	0.93
FYB	1.28	0.28	0.91	1.46	0.051	0.22	0.81	0.27	0.87
G6PD	0.93	0.49	0.96	1.02	0.84	0.89	0.93	0.42	0.88
GADD45GIP1	1.07	0.51	0.96	0.96	0.6	0.71	0.94	0.41	0.88
GAGE1_GAGE12I_GAGE12F	3.69	0.013	0.47	3.06	0.0046	0.12	0.89	0.81	0.97
GAGE10	1.14	0.66	0.99	1.11	0.6	0.71	1	0.99	1
GAGE12J	2.24	0.027	0.57	1.8	0.032	0.2	0.78	0.45	0.88
GAGE13	1.56	0.05	0.64	1.36	0.045	0.2	0.88	0.54	0.91
GAGE2C_GAGE2A_GAGE2E	3.67	0.0091	0.47	2.16	0.034	0.2	0.51	0.12	0.87
GATA3	1.4	0.19	0.87	1.57	0.027	0.2	1.03	0.89	0.98
GBP1	0.84	0.34	0.93	0.97	0.83	0.88	0.91	0.53	0.91
GNLY	1.26	0.44	0.93	1.37	0.16	0.33	1	0.99	1
GPR18	0.96	0.89	0.99	1.69	0.036	0.2	1.07	0.78	0.96
GRAP2	1.01	0.97	0.99	1.39	0.18	0.34	0.69	0.13	0.87
GUSB	1.09	0.34	0.93	1.09	0.19	0.36	1.02	0.73	0.93
GZMA	0.88	0.67	0.99	1.81	0.041	0.2	0.89	0.65	0.92
GZMB	0.92	0.8	0.99	1.76	0.051	0.22	0.86	0.58	0.91
GZMH	1.45	0.2	0.87	2.15	0.0068	0.13	0.75	0.26	0.87
GZMK	1.14	0.68	0.99	1.74	0.076	0.25	0.77	0.37	0.88
HAVCR2	1.06	0.72	0.99	1.36	0.053	0.22	0.91	0.55	0.91
HERC6	0.78	0.2	0.87	0.92	0.56	0.69	1.12	0.43	0.88
HGF	1.15	0.57	0.98	1.27	0.27	0.43	0.76	0.2	0.87
HIF1A	1.16	0.15	0.83	1.11	0.2	0.36	1.05	0.54	0.91
HLA_A	0.77	0.78	0.99	0.94	0.93	0.95	1.05	0.94	1
HLA_B	1.71	0.41	0.93	2.02	0.18	0.34	1.65	0.33	0.87
HLA_C	1.64	0.22	0.87	1.3	0.4	0.55	1.04	0.9	0.99
HLA_DMA	1.09	0.6	0.99	0.99	0.97	0.98	0.89	0.4	0.88
HLA_DMB	0.77	0.56	0.98	1.68	0.14	0.31	1.44	0.33	0.87
HLA_DOA	1.21	0.43	0.93	1.02	0.94	0.96	0.67	0.04	0.87
HLA_DOB	1.17	0.56	0.98	1.04	0.86	0.9	0.78	0.26	0.87
HLA_DPA1	1.04	0.95	0.99	1.25	0.58	0.71	1.28	0.59	0.91
HLA_DPB1	1	0.99	0.99	1.07	0.7	0.8	0.8	0.23	0.87
HLA_DQA1	0.8	0.56	0.98	0.89	0.68	0.78	0.91	0.76	0.95
HLA_DQA2	1.71	0.082	0.7	1.66	0.045	0.2	1.1	0.7	0.93
HLA_DQB2	1.33	0.37	0.93	2.07	0.0042	0.12	1.13	0.6	0.91
HLA_DRA	1.05	0.8	0.99	1	0.98	0.99	0.82	0.24	0.87
HLA_DRB1	0.53	0.17	0.87	0.5	0.071	0.24	0.95	0.92	0.99
HLA_E	0.98	0.9	0.99	1.06	0.59	0.71	1	0.99	1
HLA_F	0.92	0.67	0.99	0.89	0.5	0.64	0.81	0.22	0.87
HLA_F_AS1	0.81	0.41	0.93	0.95	0.78	0.86	0.92	0.69	0.93
HLA_G	1.12	0.72	0.99	1.04	0.9	0.93	1.17	0.57	0.91
HMBS	1.02	0.88	0.99	0.93	0.4	0.55	0.87	0.11	0.87
ICAM1	1.22	0.32	0.93	1.22	0.24	0.4	0.93	0.66	0.92
ICOS	1.03	0.91	0.99	1.49	0.11	0.29	0.88	0.62	0.92
ICOSLG	1.03	0.81	0.99	1.04	0.75	0.84	0.96	0.71	0.93
ID2	1.27	0.17	0.87	1.48	0.0076	0.13	1.1	0.48	0.89
ID3	1.07	0.73	0.99	1.23	0.27	0.44	0.83	0.31	0.87
IDO1	0.86	0.64	0.99	1.15	0.62	0.72	1.01	0.96	1
IDO2	1.17	0.57	0.98	1.28	0.27	0.44	0.77	0.26	0.87
IFI27	0.62	0.067	0.64	0.79	0.25	0.42	1.07	0.73	0.93
IFI35	0.81	0.21	0.87	0.93	0.55	0.68	0.87	0.26	0.87
IFI44L	0.67	0.086	0.7	0.76	0.16	0.33	1.03	0.86	0.97
IFI6	0.68	0.092	0.7	0.68	0.038	0.2	0.89	0.53	0.91
IFIH1	0.84	0.36	0.93	0.89	0.46	0.61	1.1	0.51	0.91
IFIT1	0.6	0.034	0.57	0.65	0.03	0.2	1.05	0.79	0.97
IFIT2	0.66	0.044	0.64	0.69	0.024	0.19	1.01	0.92	0.99
IFIT3	0.64	0.034	0.57	0.74	0.082	0.26	0.96	0.82	0.97
IFITM1	0.83	0.26	0.9	0.81	0.14	0.31	1.11	0.41	0.88
IFITM2	0.98	0.88	0.99	0.86	0.27	0.44	1.03	0.81	0.97
IFNA17	1.43	0.26	0.9	1.18	0.38	0.54	0.94	0.8	0.97
IFNB1	0.97	0.89	0.99	0.82	0.26	0.43	1	1	1
IFNG	0.88	0.68	0.99	1.6	0.081	0.26	0.85	0.52	0.91
IGF1R	1.07	0.69	0.99	0.92	0.51	0.65	0.91	0.44	0.88
IGSF6	1.04	0.85	0.99	1.41	0.16	0.33	0.92	0.73	0.93
IKZF1	1.25	0.37	0.93	1.39	0.088	0.26	0.73	0.13	0.87
IKZF2	1.01	0.95	0.99	0.99	0.95	0.96	1.04	0.74	0.94
IKZF3	1.59	0.11	0.73	2	0.0051	0.12	0.8	0.33	0.87
IKZF4	1.2	0.25	0.89	1.18	0.23	0.39	0.94	0.59	0.91
IL10	1.88	0.0074	0.47	1.82	0.0059	0.12	0.76	0.16	0.87
IL10RA	1.25	0.27	0.91	1.44	0.035	0.2	0.82	0.26	0.87
IL12A	1.03	0.92	0.99	0.75	0.15	0.33	0.81	0.32	0.87
IL12B	1.1	0.72	0.99	1.41	0.091	0.26	0.99	0.95	1
IL13	1.05	0.79	0.99	1.17	0.3	0.46	1.08	0.63	0.92
IL15	0.72	0.18	0.87	0.9	0.57	0.69	1.1	0.62	0.92
IL17A	0.76	0.0088	0.47	0.99	0.96	0.97	0.94	0.54	0.91
IL17F	1.22	0.066	0.64	1.05	0.49	0.63	0.97	0.74	0.94
IL18	0.96	0.84	0.99	1.18	0.27	0.44	1.11	0.45	0.88
IL1A	1.06	0.82	0.99	1.06	0.81	0.88	1.14	0.56	0.91
IL1B	1.26	0.37	0.93	1.47	0.051	0.22	1.08	0.71	0.93
IL2	1.42	0.029	0.57	1.07	0.59	0.71	0.88	0.31	0.87
IL21	1.11	0.63	0.99	1.49	0.043	0.2	0.96	0.82	0.97
IL22	1.2	0.075	0.66	1.07	0.25	0.42	0.85	0.042	0.87
IL23A	1.33	0.21	0.87	1.15	0.44	0.59	0.92	0.65	0.92
IL2RA	1.27	0.38	0.93	1.49	0.09	0.26	0.65	0.059	0.87
IL2RB	1	0.99	0.99	1.38	0.15	0.33	0.81	0.33	0.87
IL2RG	1.07	0.83	0.99	1.4	0.17	0.33	0.84	0.44	0.88
IL3RA	1.29	0.21	0.87	1.31	0.096	0.27	0.71	0.043	0.87
IL4	1.02	0.83	0.99	1.03	0.72	0.81	1.01	0.95	1
IL6	1.54	0.16	0.85	2.1	0.0048	0.12	1	1	1
IL7	1.3	0.31	0.93	1.3	0.23	0.39	0.81	0.24	0.87
IL7R	1.62	0.12	0.76	1.71	0.041	0.2	0.71	0.17	0.87
IRF1	0.86	0.33	0.93	1.14	0.29	0.45	1.11	0.41	0.88
IRF4	1.3	0.54	0.98	2.54	0.012	0.15	0.7	0.32	0.87
IRF9	0.79	0.052	0.64	0.88	0.19	0.36	1.21	0.051	0.87
IRS1	1.06	0.76	0.99	1.22	0.16	0.33	1.17	0.3	0.87
ISG15	0.62	0.045	0.64	0.74	0.1	0.28	0.95	0.73	0.94
ISG20	1	0.99	0.99	1.17	0.39	0.54	0.86	0.35	0.88
ITGA1	0.99	0.97	0.99	0.98	0.89	0.93	0.86	0.35	0.88
ITGAE	1.02	0.83	0.99	1.08	0.37	0.53	0.94	0.5	0.91
ITGAL	1.14	0.62	0.99	1.47	0.073	0.24	0.8	0.29	0.87
ITGAM	1.44	0.07	0.64	1.34	0.068	0.24	0.77	0.12	0.87
ITGAX	1.19	0.39	0.93	1.29	0.13	0.31	0.96	0.81	0.97
ITGB1	1.32	0.011	0.47	1.26	0.012	0.15	0.94	0.53	0.91
ITGB2	1.24	0.29	0.93	1.39	0.052	0.22	0.8	0.17	0.87
ITGB7	0.92	0.62	0.99	1.05	0.76	0.84	0.89	0.4	0.88
ITK	1.08	0.82	0.99	1.42	0.19	0.35	0.72	0.21	0.87
JAML	1.77	0.034	0.57	2.06	0.0036	0.12	0.71	0.12	0.87
JCHAIN	1.01	0.99	0.99	2.42	0.024	0.19	1.07	0.86	0.97
KIAA0101	0.89	0.53	0.98	0.72	0.031	0.2	0.89	0.44	0.88
KIR2DL1	1.03	0.5	0.96	1.07	0.2	0.37	1.06	0.27	0.87
KIR2DL2	0.98	0.8	0.99	1.04	0.43	0.59	1.05	0.33	0.87
KIR2DL3	0.95	0.78	0.99	1.2	0.32	0.48	1.13	0.48	0.89
KLF2	1.39	0.16	0.85	1.66	0.018	0.17	0.96	0.85	0.97
KLRB1	1.53	0.16	0.85	1.95	0.014	0.15	0.89	0.64	0.92
KLRD1	1.32	0.23	0.87	1.68	0.022	0.19	0.77	0.21	0.87
KLRF1	0.92	0.76	0.99	1.12	0.6	0.71	1.11	0.63	0.92
KLRG1	1.87	0.0014	0.28	1.38	0.04	0.2	0.72	0.066	0.87
KLRK1	1.3	0.36	0.93	1.74	0.022	0.19	0.87	0.56	0.91
KREMEN1	1.01	0.96	0.99	1.27	0.042	0.2	1.03	0.81	0.97
KRT5	1.18	0.68	0.99	1.2	0.6	0.71	1.19	0.62	0.92
KRT7	1.19	0.43	0.93	0.85	0.43	0.59	0.87	0.5	0.91
LAG3	1.04	0.86	0.99	1.57	0.028	0.2	0.93	0.65	0.92
LAMP1	1.04	0.71	0.99	0.98	0.83	0.88	0.95	0.59	0.91
LAMP3	0.59	0.033	0.57	0.72	0.084	0.26	1.06	0.76	0.95
LAPTM5	1.14	0.52	0.98	1.22	0.27	0.44	0.85	0.36	0.88
LCK	1.57	0.13	0.78	0.87	0.47	0.62	0.63	0.028	0.87
LCN2	0.67	0.24	0.89	0.49	0.011	0.15	0.84	0.53	0.91
LEXM	0.71	0.17	0.87	0.67	0.07	0.24	1	1	1
LILRB1	1.11	0.71	0.99	1.46	0.078	0.25	0.78	0.25	0.87
LILRB2	1.35	0.13	0.78	1.42	0.034	0.2	0.78	0.13	0.87
LMNA	1.04	0.76	0.99	1.22	0.094	0.26	1.06	0.63	0.92
LRG1	1.06	0.85	0.99	1	1	1	1.22	0.39	0.88
LRP1	1.14	0.35	0.93	1.17	0.22	0.39	0.77	0.035	0.87
LST1	1.04	0.87	0.99	1.2	0.33	0.49	0.86	0.44	0.88
LY9	1.12	0.74	0.99	1.77	0.031	0.2	0.95	0.85	0.97
LYZ	1.16	0.6	0.99	1.91	0.016	0.16	0.82	0.42	0.88
M6PR	1.04	0.7	0.99	0.99	0.84	0.89	0.97	0.69	0.93
MAD2L1	1	0.99	0.99	0.93	0.53	0.67	0.95	0.68	0.92
MADCAM1	1.22	0.42	0.93	1.19	0.36	0.52	1.16	0.44	0.88
MAGEA1	1	0.99	0.99	1.19	0.55	0.68	1.13	0.67	0.92
MAGEA10	3.95	0.0026	0.35	1.25	0.48	0.62	0.57	0.13	0.87
MAGEA12	1.08	0.46	0.94	1.01	0.91	0.94	0.93	0.46	0.88
MAGEA3	1.28	0.24	0.89	1.12	0.51	0.65	1	0.99	1
MAGEA4	3.88	0.011	0.47	1.69	0.2	0.36	0.77	0.54	0.91
MAGEC2	1.28	0.55	0.98	1.27	0.51	0.65	0.87	0.69	0.93
MAPK1	0.97	0.78	0.99	0.94	0.35	0.51	0.97	0.68	0.92
MAPK14	1.06	0.54	0.98	1.07	0.24	0.4	1.05	0.43	0.88
MELK	0.85	0.36	0.93	0.8	0.14	0.31	0.94	0.65	0.92
MIF	0.93	0.57	0.98	0.81	0.026	0.2	0.92	0.44	0.88
MKI67	1.04	0.82	0.99	0.75	0.14	0.31	0.74	0.11	0.87
MLANA	1.12	0.47	0.95	1.01	0.92	0.95	0.9	0.38	0.88
MMP2	1.02	0.93	0.99	1.38	0.2	0.36	0.7	0.16	0.87
MMP9	1.3	0.48	0.96	1.6	0.14	0.31	0.73	0.32	0.87
MPO	1.85	0.021	0.57	1.41	0.15	0.31	0.84	0.46	0.88
MRC1	1.37	0.18	0.87	1.84	0.0024	0.12	0.85	0.39	0.88
MS4A1	1.23	0.65	0.99	1.9	0.055	0.22	0.69	0.32	0.87
MTOR	1.1	0.32	0.93	1.01	0.9	0.93	0.91	0.16	0.87
MX1	0.64	0.069	0.64	0.71	0.056	0.22	0.98	0.89	0.98
MYC	0.83	0.23	0.87	0.95	0.72	0.81	1.37	0.037	0.87
NCAM1	1.15	0.64	0.99	1	0.99	1	1.03	0.91	0.99
NCF1	1.38	0.23	0.87	1.62	0.021	0.18	0.74	0.14	0.87
NCR1	1.25	0.36	0.93	1.73	0.012	0.15	1.07	0.75	0.95
NCR3	1.33	0.34	0.93	1.51	0.088	0.26	0.69	0.12	0.87
NECTIN2	0.95	0.75	0.99	0.95	0.7	0.8	1	0.99	1
NFATC1	0.97	0.84	0.99	1.26	0.12	0.29	1.15	0.3	0.87
NFKBIA	0.94	0.64	0.99	0.97	0.83	0.88	1.21	0.089	0.87
NKG7	1.06	0.85	0.99	1.76	0.029	0.2	0.85	0.46	0.88
NOS2	0.7	0.18	0.87	1.15	0.6	0.71	1.02	0.93	0.99
NOTCH3	1.43	0.026	0.57	1.17	0.22	0.39	0.8	0.087	0.87
NRP1	1.03	0.82	0.99	1.03	0.79	0.87	0.9	0.42	0.88
NT5E	0.87	0.55	0.98	0.95	0.81	0.88	0.83	0.36	0.88
NTN3	1.44	0.21	0.87	1.32	0.21	0.37	0.79	0.27	0.87
OAS1	0.67	0.047	0.64	0.76	0.098	0.27	1.03	0.85	0.97
OAS2	0.62	0.026	0.57	0.73	0.073	0.24	1.03	0.87	0.98
OAS3	0.7	0.071	0.64	0.74	0.068	0.24	0.99	0.94	1
PDCD1	0.97	0.89	0.99	1.36	0.17	0.33	0.92	0.68	0.92
PDCD1LG2	1.12	0.62	0.99	1.48	0.057	0.22	0.75	0.16	0.87
PECAM1	0.64	0.14	0.83	0.64	0.087	0.26	0.9	0.71	0.93
PGF	1.54	0.048	0.64	1.3	0.13	0.31	0.69	0.033	0.87
PIK3CA	1.04	0.66	0.99	0.99	0.87	0.91	1.02	0.8	0.97
PIK3CD	1.21	0.22	0.87	1.11	0.37	0.53	0.75	0.02	0.87
PMEL	1.04	0.81	0.99	0.83	0.22	0.39	0.84	0.29	0.87
POLR2A	1.12	0.44	0.93	1.24	0.023	0.19	1.02	0.86	0.97
POU2AF1	1.04	0.92	0.99	2.47	0.012	0.15	0.85	0.66	0.92
PRDM1	1.19	0.38	0.93	1.61	0.013	0.15	0.83	0.3	0.87
PRF1	0.85	0.5	0.96	1.66	0.017	0.17	1.12	0.56	0.91
PSMB9	0.77	0.19	0.87	0.88	0.4	0.55	0.99	0.95	1
PTEN	1.09	0.6	0.99	1.15	0.28	0.44	1.17	0.2	0.87
PTGS2	1.75	0.044	0.64	1.98	0.0021	0.12	1	1	1
PTK7	1.06	0.59	0.99	1.08	0.32	0.48	0.95	0.56	0.91
PTPN11	1.13	0.11	0.73	1.02	0.78	0.86	1.01	0.94	1
PTPN6	1.15	0.21	0.87	1.08	0.36	0.52	0.92	0.32	0.87
PTPN7	1.19	0.49	0.96	1.49	0.055	0.22	0.73	0.097	0.87
PTPRC	1.38	0.33	0.93	2.01	0.013	0.15	0.76	0.3	0.87
PTPRCAP	1.4	0.14	0.8	1.43	0.061	0.23	0.79	0.2	0.87
PVR	1.05	0.7	0.99	1.05	0.65	0.76	1.05	0.68	0.92
PYGL	0.91	0.55	0.98	0.92	0.47	0.62	1.05	0.7	0.93
RB1	1.04	0.67	0.99	1.03	0.68	0.78	1	0.99	1
RORC	0.83	0.44	0.93	0.67	0.054	0.22	0.92	0.68	0.92
RPS6	1.02	0.9	0.99	0.96	0.71	0.81	1.18	0.1	0.87
S100A8	1.84	0.085	0.7	2.07	0.0085	0.13	1.07	0.82	0.97
S100A9	1.6	0.15	0.84	1.62	0.06	0.23	0.99	0.98	1
SAMHD1	0.97	0.84	0.99	1.22	0.12	0.29	1.06	0.61	0.91
SDHA	0.93	0.35	0.93	0.91	0.13	0.31	1.09	0.14	0.87
SELL	1.07	0.81	0.99	1.41	0.17	0.34	0.7	0.16	0.87
SH2D1A	1.12	0.71	0.99	1.39	0.26	0.42	0.65	0.12	0.87
SH2D1B	1.2	0.54	0.98	1.89	0.007	0.13	1.22	0.38	0.88
SIT1	0.86	0.65	0.99	1.43	0.19	0.36	0.77	0.33	0.87
SKAP2	1.08	0.61	0.99	1.26	0.081	0.26	0.98	0.84	0.97
SLAMF7	1.02	0.97	0.99	2.17	0.018	0.17	0.95	0.87	0.98
SLAMF8	1.28	0.34	0.93	1.34	0.2	0.37	0.74	0.18	0.87
SNAI1	1.36	0.091	0.7	1.45	0.015	0.15	0.89	0.43	0.88
SNAI2	1.22	0.44	0.93	1.2	0.44	0.59	0.63	0.058	0.87
SRGN	1.21	0.31	0.93	1.36	0.044	0.2	0.92	0.59	0.91
SSX2	1.73	0.034	0.57	1.31	0.24	0.4	0.72	0.21	0.87
STAT1	0.77	0.066	0.64	0.87	0.28	0.44	0.89	0.31	0.87
STAT3	1.11	0.25	0.89	1.12	0.1	0.28	0.95	0.46	0.88
STAT4	1.42	0.22	0.87	1.55	0.036	0.2	0.7	0.11	0.87
STAT5A	1.12	0.35	0.93	1.1	0.35	0.51	0.9	0.3	0.87
STAT6	1.01	0.96	0.99	0.97	0.76	0.85	0.97	0.74	0.94
TAGAP	1.08	0.76	0.99	1.44	0.092	0.26	0.82	0.37	0.88
TAP1	0.81	0.3	0.93	0.92	0.61	0.72	0.97	0.82	0.97
TARP	1.07	0.81	0.99	1.52	0.11	0.28	0.88	0.61	0.91
TBP	1.07	0.42	0.93	1.08	0.21	0.37	1	0.95	1
TBX21	1.59	0.13	0.78	2.66	0.00011	0.044	1.02	0.93	0.99
TCF7	1.17	0.42	0.93	1.04	0.79	0.87	0.82	0.2	0.87
TDO2	1.14	0.67	0.99	0.71	0.17	0.33	0.44	0.0015	0.3
TFRC	1.15	0.29	0.93	1.07	0.52	0.66	1.07	0.58	0.91
TGFB1	1.13	0.41	0.93	1.45	0.0055	0.12	0.94	0.64	0.92
TIGIT	1.24	0.49	0.96	1.56	0.11	0.28	0.74	0.25	0.87
TLR3	0.85	0.42	0.93	0.98	0.93	0.95	1.15	0.38	0.88
TLR7	1.26	0.34	0.93	1.25	0.32	0.48	0.78	0.21	0.87
TLR8	1.37	0.21	0.87	1.62	0.033	0.2	0.75	0.17	0.87
TLR9	1.37	0.065	0.64	0.97	0.86	0.9	0.76	0.053	0.87
TNF	1.04	0.89	0.99	1.12	0.6	0.71	1.15	0.48	0.89
TNFAIP8	0.75	0.093	0.7	0.9	0.45	0.61	1.01	0.92	0.99
TNFRSF14	0.92	0.59	0.99	1.21	0.14	0.31	1.16	0.24	0.87
TNFRSF17	1.07	0.87	0.99	2.1	0.04	0.2	0.96	0.91	0.99
TNFRSF18	1.3	0.38	0.93	1.26	0.32	0.48	0.77	0.24	0.87
TNFRSF4	0.99	0.95	0.99	0.92	0.65	0.75	0.71	0.082	0.87
TNFRSF9	1.38	0.32	0.93	1.35	0.29	0.45	0.68	0.096	0.87
TNFSF10	0.77	0.19	0.87	0.86	0.44	0.59	0.93	0.67	0.92
TNFSF13B	0.9	0.59	0.99	1.18	0.3	0.45	1.05	0.77	0.96
TNFSF14	1.46	0.27	0.91	1.22	0.51	0.65	0.55	0.039	0.87
TNFSF18	1.81	0.032	0.57	1.5	0.071	0.24	0.91	0.69	0.93
TNFSF4	1.17	0.45	0.94	1.08	0.63	0.74	0.73	0.077	0.87
TNFSF9	1	0.98	0.99	1.64	0.03	0.2	1.12	0.6	0.91
TOP2A	1.1	0.62	0.99	0.92	0.6	0.71	0.81	0.21	0.87
TP63	0.83	0.47	0.95	1.12	0.61	0.72	0.83	0.41	0.88
TRIM29	1.01	0.98	0.99	0.81	0.48	0.62	1.07	0.81	0.97
TUBB	1.05	0.6	0.99	0.96	0.58	0.71	0.96	0.57	0.91
TWIST1	0.96	0.88	0.99	1.19	0.47	0.62	0.7	0.14	0.87
TYROBP	1.06	0.75	0.99	1.41	0.051	0.22	0.98	0.89	0.98
VCAM1	1.22	0.41	0.93	1.14	0.56	0.69	0.67	0.05	0.87
VEGFA	1.17	0.42	0.93	0.95	0.74	0.83	0.92	0.57	0.91
VTCN1	1.01	0.97	0.99	0.73	0.36	0.52	0.69	0.27	0.87
XAGE1B	3.3	0.0038	0.38	2.41	0.0086	0.13	0.8	0.57	0.91
ZAP70	1.47	0.19	0.87	1.84	0.0033	0.12	0.83	0.39	0.88
ZBTB46	0.97	0.83	0.99	0.78	0.039	0.2	0.87	0.25	0.87
ZEB1	1.18	0.43	0.93	1.23	0.3	0.46	0.74	0.14	0.87
