# Supplementary material for: RB1 expression and HR proficiency define a poor-outcome molecular subtype of high grade serous ovarian carcinoma
Source: Research Square preprint supplement (doi:10.21203/rs.3.rs-5523163/v1), 2025-07-14
Supplement: Supplementary file 8 [file 960110c2be412bf51d2aa1b8.xlsx]

## Sheet: Sheet1
Supplementary Table 4. Complete list of gene expression comparisons between BRCAa, NBHRa, and HRi HGSOC evaluated by institutional CGIP.
	Group 1 (BRCAa) vs Group 2 (NBHRa)			Group 1 (BRCAa) vs Group 3 (HRi)			Group 2 (NBHRa) vs Group 3 (HRi)
Gene	Estimated fold change	P	FDR	Estimated fold change	P	FDR	Estimated fold change	P	FDR
ABCF1	1.05	0.47	0.93	0.95	0.22	0.38	0.93	0.21	0.77										OR		Difference between groups in gene expression (normalized reads per million, nRPM) was significant at uncorrected P < 0.05 and multiple testing corrected false discovery rate (FDR) < 0.25
ADGRE5	1.06	0.62	0.97	1.09	0.32	0.48	0.96	0.73	0.89										OR		Difference between groups in gene expression (normalized reads per million, nRPM) was not significant but may still be of interest to note as it reached uncorrected P < 0.05
ADORA2A	1.37	0.06	0.5	1.46	0.004	0.057	0.87	0.21	0.77
AIF1	1.09	0.62	0.97	1.37	0.024	0.11	0.89	0.42	0.82
AKT1	0.93	0.45	0.92	0.84	0.016	0.1	0.96	0.63	0.88									Volcano plot legend
ALOX15B	1.65	0.026	0.35	1.41	0.078	0.23	0.83	0.36	0.82
ARG1	0.99	0.95	1	1.07	0.66	0.75	1.35	0.027	0.77											Diamond, colored points = Difference between groups in gene expression (normalized reads per million, nRPM) was significant at uncorrected P < 0.05 and multiple testing corrected false discovery rate (FDR) < 0.25
AXL	0.87	0.35	0.88	1.14	0.3	0.46	0.98	0.86	0.91
B3GAT1	1.1	0.74	0.99	0.79	0.31	0.47	0.76	0.22	0.77
BAGE	1.68	0.13	0.67	1.17	0.55	0.66	0.78	0.4	0.82											Circle, colored points = Difference between groups in gene expression (normalized reads per million, nRPM) was not significant but may still be of interest to note as it reached uncorrected P < 0.05
BATF	1.01	0.96	1	1.63	0.0078	0.074	0.91	0.57	0.86
BCL2	1.11	0.57	0.93	1.42	0.016	0.1	1.03	0.82	0.9
BCL2L11	1.07	0.42	0.92	1.07	0.29	0.45	1.07	0.35	0.82											Grey points = Association with gene's expression resulted in P >= 0.05
BCL6	0.98	0.84	0.99	0.92	0.35	0.49	1.08	0.45	0.82
BRCA1	1.02	0.89	0.99	1.11	0.43	0.57	0.95	0.67	0.89
BRCA2	1.25	0.16	0.7	1.25	0.11	0.26	0.96	0.76	0.9
BST2	0.74	0.048	0.49	0.69	0.0029	0.053	1.07	0.65	0.89
BTLA	1.34	0.25	0.8	1.5	0.034	0.13	0.76	0.21	0.77
BUB1	1.11	0.44	0.92	0.85	0.14	0.28	0.85	0.18	0.77
C10orf54	1.15	0.4	0.92	1.29	0.045	0.17	0.96	0.71	0.89
C1QA	0.93	0.68	0.99	1.17	0.29	0.46	0.77	0.087	0.77
C1QB	0.97	0.89	1	1.13	0.42	0.57	0.77	0.11	0.77
CA4	1.2	0.54	0.93	1.16	0.51	0.62	0.9	0.69	0.89
CBLB	1.13	0.42	0.92	1.13	0.28	0.44	0.95	0.7	0.89
CCL17	1.61	0.089	0.56	1.3	0.22	0.38	0.44	0.00089	0.35
CCL18	1.13	0.71	0.99	2.36	0.0018	0.042	1.05	0.85	0.91
CCL2	0.83	0.32	0.87	1.34	0.069	0.21	1.11	0.51	0.83
CCL20	0.85	0.59	0.94	0.91	0.68	0.77	1.08	0.72	0.89
CCL21	1.39	0.44	0.92	1.69	0.085	0.24	1.12	0.74	0.9
CCL22	1.7	0.075	0.52	1.84	0.0058	0.062	0.72	0.15	0.77
CCL3	1.02	0.93	1	1.45	0.024	0.11	0.94	0.75	0.9
CCL4	1.11	0.63	0.97	1.73	0.0031	0.053	0.95	0.76	0.9
CCL5	1.03	0.91	1	1.43	0.062	0.21	0.78	0.18	0.77
CCNB2	1.12	0.57	0.93	0.96	0.79	0.85	0.75	0.018	0.77
CCR1	0.86	0.42	0.92	1.33	0.066	0.21	0.97	0.82	0.9
CCR2	1	1	1	1.5	0.093	0.24	0.79	0.35	0.82
CCR4	1.15	0.57	0.93	1.38	0.11	0.26	0.75	0.17	0.77
CCR5	0.98	0.93	1	1.49	0.051	0.18	0.92	0.67	0.89
CCR6	1.64	0.032	0.37	1.69	0.0028	0.053	0.81	0.24	0.77
CCR7	1.33	0.34	0.87	1.45	0.092	0.24	0.71	0.16	0.77
CD14	1.08	0.62	0.97	1.18	0.17	0.31	0.85	0.23	0.77
CD160	0.96	0.87	0.99	1.36	0.069	0.21	0.94	0.73	0.89
CD163	1.43	0.074	0.52	1.45	0.018	0.1	0.84	0.24	0.77
CD19	0.92	0.79	0.99	1.32	0.22	0.38	0.65	0.1	0.77
CD1C	1.72	0.077	0.52	1.89	0.0089	0.074	0.91	0.73	0.89
CD1D	1.53	0.028	0.35	1.63	0.003	0.053	0.83	0.26	0.77
CD2	1.01	0.96	1	1.38	0.14	0.28	0.72	0.15	0.77
CD209	0.96	0.84	0.99	1.18	0.41	0.55	0.63	0.018	0.77
CD22	1.5	0.15	0.69	1.39	0.14	0.28	1.06	0.81	0.9
CD226	1.21	0.34	0.87	1.55	0.0059	0.062	0.93	0.6	0.86
CD244	1.42	0.14	0.67	1.75	0.004	0.057	0.88	0.51	0.83
CD247	1.11	0.68	0.99	1.53	0.04	0.15	0.84	0.41	0.82
CD27	1.05	0.86	0.99	1.44	0.13	0.26	0.69	0.14	0.77
CD274	0.92	0.66	0.98	1.13	0.43	0.57	0.91	0.57	0.86
CD276	1.02	0.83	0.99	0.97	0.69	0.78	0.89	0.22	0.77
CD28	1.28	0.25	0.8	1.52	0.013	0.092	0.88	0.46	0.82
CD3	1.05	0.84	0.99	1.38	0.097	0.24	0.69	0.056	0.77
CD33	1.07	0.74	0.99	1.3	0.067	0.21	0.93	0.61	0.86
CD37	1.08	0.71	0.99	1.16	0.32	0.48	0.8	0.21	0.77
CD38	1.09	0.76	0.99	1.54	0.066	0.21	0.77	0.28	0.78
CD3D	1	1	1	1.36	0.16	0.3	0.66	0.051	0.77
CD3E	1.01	0.96	1	1.52	0.05	0.18	0.7	0.093	0.77
CD3G	1.07	0.79	0.99	1.41	0.11	0.26	0.69	0.099	0.77
CD4	1.04	0.83	0.99	1.24	0.13	0.26	0.83	0.18	0.77
CD40	0.96	0.76	0.99	0.91	0.4	0.54	0.81	0.072	0.77
CD40LG	1.42	0.16	0.7	1.4	0.085	0.24	0.66	0.053	0.77
CD44	1.61	0.013	0.3	1.71	0.00062	0.03	1.06	0.76	0.9
CD47	1.39	0.0055	0.23	0.97	0.75	0.81	0.88	0.24	0.77
CD48	0.98	0.91	1	1.5	0.024	0.11	0.87	0.44	0.82
CD52	1.24	0.32	0.87	1.66	0.0053	0.062	0.88	0.5	0.83
CD53	1.08	0.81	0.99	1.49	0.11	0.26	0.69	0.2	0.77
CD6	1.14	0.56	0.93	1.36	0.065	0.21	0.81	0.25	0.77
CD63	1.1	0.27	0.84	1.11	0.1	0.25	1.06	0.45	0.82
CD68	0.97	0.84	0.99	1.31	0.025	0.11	0.96	0.76	0.9
CD69	1.14	0.59	0.94	1.37	0.12	0.26	0.86	0.47	0.82
CD70	0.89	0.63	0.97	1.2	0.35	0.5	0.71	0.1	0.77
CD74	0.98	0.93	1	1.05	0.75	0.82	0.9	0.48	0.82
CD79A	0.91	0.81	0.99	1.92	0.025	0.11	0.87	0.66	0.89
CD79B	0.95	0.85	0.99	1.24	0.29	0.46	0.7	0.11	0.77
CD8	0.86	0.46	0.92	1.22	0.26	0.43	0.77	0.16	0.77
CD80	0.83	0.32	0.87	1	0.99	0.99	0.81	0.19	0.77
CD83	1.12	0.52	0.93	1.32	0.043	0.16	0.95	0.63	0.88
CD86	1.04	0.85	0.99	1.44	0.034	0.13	0.9	0.52	0.83
CD8A	1.05	0.83	0.99	1.5	0.044	0.16	0.8	0.26	0.77
CD8B	0.82	0.43	0.92	1.08	0.7	0.78	0.71	0.1	0.77
CDK1	1.2	0.36	0.88	1	0.98	0.98	0.88	0.32	0.82
CDKN2A	1.01	0.96	1	1.31	0.22	0.38	1.54	0.054	0.77
CDKN3	1.16	0.54	0.93	1.12	0.49	0.61	0.99	0.92	0.94
CEACAM1	0.59	0.025	0.35	0.95	0.78	0.84	1.1	0.63	0.88
CEACAM8	1.07	0.12	0.65	1.09	0.089	0.24	1.01	0.85	0.91
CIITA	0.97	0.86	0.99	0.88	0.34	0.49	0.84	0.25	0.77
CLEC4C	1.05	0.87	0.99	1.45	0.098	0.24	0.87	0.6	0.86
CMKLR1	1.02	0.93	1	1.17	0.33	0.48	0.88	0.45	0.82
CORO1A	1.06	0.73	0.99	1.17	0.25	0.42	0.85	0.22	0.77
CRTAM	1.22	0.44	0.92	1.65	0.018	0.1	0.85	0.45	0.82
CSF1R	1.2	0.31	0.87	1.14	0.33	0.48	0.84	0.2	0.77
CSF2RB	1.13	0.55	0.93	1.59	0.0068	0.066	0.8	0.2	0.77
CTAG1B	1.78	0.14	0.67	1.09	0.75	0.82	0.82	0.57	0.86
CTAG2	1.25	0.21	0.78	1.2	0.28	0.44	1.18	0.35	0.82
CTLA4	1.2	0.45	0.92	1.57	0.021	0.11	0.89	0.57	0.86
CTSS	1.03	0.85	0.99	1.25	0.13	0.27	0.89	0.45	0.82
CX3CL1	1.06	0.71	0.99	1.09	0.54	0.66	0.86	0.3	0.8
CX3CR1	1.05	0.76	0.99	1.11	0.45	0.58	1.18	0.27	0.77
CXCL1	1.29	0.35	0.88	1.42	0.13	0.27	1.11	0.67	0.89
CXCL10	0.69	0.14	0.67	0.82	0.35	0.5	0.8	0.32	0.81
CXCL11	0.58	0.061	0.5	0.77	0.3	0.47	0.67	0.12	0.77
CXCL13	1.11	0.73	0.99	1.29	0.32	0.48	0.57	0.031	0.77
CXCL8	1.35	0.22	0.78	1.37	0.14	0.28	1.05	0.82	0.9
CXCL9	0.91	0.75	0.99	1.03	0.91	0.94	0.59	0.068	0.77
CXCR2	1.38	0.17	0.72	1.9	0.0011	0.034	1.05	0.82	0.9
CXCR3	0.93	0.72	0.99	1.15	0.4	0.54	0.76	0.13	0.77
CXCR4	1.17	0.45	0.92	1.16	0.36	0.5	1.11	0.49	0.83
CXCR5	1.22	0.49	0.93	1.44	0.088	0.24	0.8	0.37	0.82
CXCR6	0.84	0.53	0.93	1.33	0.2	0.35	0.87	0.58	0.86
CYBB	0.99	0.95	1	1.26	0.083	0.24	0.9	0.48	0.82
DDX58	0.78	0.11	0.65	0.81	0.11	0.26	0.98	0.87	0.92
DGAT2	0.86	0.46	0.92	1.09	0.59	0.7	1.08	0.62	0.87
DMBT1	0.43	0.015	0.33	1.1	0.74	0.81	2.16	0.01	0.77
EBI3	1.12	0.59	0.94	1.48	0.023	0.11	0.9	0.52	0.84
EFNA4	0.97	0.81	0.99	0.91	0.33	0.48	0.92	0.37	0.82
EGFR	1.21	0.22	0.78	1.16	0.22	0.38	0.93	0.5	0.83
EGR2	1.18	0.43	0.92	1.53	0.012	0.087	1.02	0.89	0.92
EGR3	1.38	0.25	0.81	2.27	0.0014	0.036	1.39	0.21	0.77
EIF2AK2	0.91	0.34	0.87	0.84	0.021	0.11	0.93	0.41	0.82
ENTPD1	1.11	0.49	0.93	1.15	0.33	0.48	0.88	0.37	0.82
EOMES	1.84	0.02	0.35	2.06	0.00069	0.03	0.72	0.13	0.77
FAS	1	0.98	1	1.11	0.34	0.49	1	0.99	0.99
FASLG	1.31	0.3	0.86	1.77	0.0086	0.074	0.83	0.41	0.82
FCER1G	1.04	0.78	0.99	1.23	0.1	0.25	0.91	0.47	0.82
FCGR1A	0.98	0.92	1	1.17	0.39	0.53	0.74	0.092	0.77
FCGR2B	1.01	0.97	1	1.39	0.09	0.24	0.74	0.15	0.77
FCGR3A	1.06	0.8	0.99	1.35	0.081	0.24	0.82	0.22	0.77
FCGR3B	1.3	0.28	0.84	1.77	0.0019	0.042	0.93	0.73	0.89
FCRLA	0.89	0.68	0.99	1.32	0.19	0.34	0.84	0.48	0.82
FOXM1	0.98	0.93	1	0.81	0.15	0.29	0.77	0.041	0.77
FOXO1	1.34	0.052	0.5	1.38	0.0068	0.066	1.03	0.81	0.9
FOXP3	1.39	0.12	0.65	1.15	0.44	0.58	0.66	0.019	0.77
FUT4	1.07	0.71	0.99	1.54	0.008	0.074	0.96	0.79	0.9
FYB	1.13	0.53	0.93	1.3	0.089	0.24	0.8	0.18	0.77
G6PD	1	0.99	1	1.1	0.27	0.44	0.92	0.27	0.77
GADD45GIP1	1.06	0.51	0.93	0.95	0.44	0.57	0.91	0.22	0.77
GAGE1_GAGE12I_GAGE12F	1.97	0.11	0.62	1.59	0.14	0.28	0.87	0.72	0.89
GAGE10	1.27	0.29	0.85	1.03	0.84	0.89	0.99	0.96	0.97
GAGE12J	1.66	0.071	0.52	1.21	0.37	0.51	0.75	0.26	0.77
GAGE13	1.29	0.2	0.77	1.05	0.73	0.8	0.87	0.41	0.82
GAGE2C_GAGE2A_GAGE2E	2.22	0.069	0.52	1.12	0.73	0.8	0.51	0.069	0.77
GATA3	1.21	0.39	0.91	1.48	0.018	0.1	0.89	0.5	0.83
GBP1	0.8	0.11	0.64	0.88	0.33	0.48	0.9	0.44	0.82
GNLY	1.09	0.7	0.99	1.27	0.19	0.34	0.96	0.84	0.91
GPR18	1.11	0.69	0.99	1.56	0.03	0.12	0.83	0.38	0.82
GRAP2	1.12	0.64	0.98	1.74	0.0062	0.063	0.8	0.27	0.77
GUSB	1.08	0.27	0.84	1.03	0.6	0.7	1.03	0.66	0.89
GZMA	0.99	0.97	1	1.71	0.016	0.1	0.79	0.25	0.77
GZMB	0.91	0.74	0.99	1.53	0.063	0.21	0.86	0.54	0.85
GZMH	1.41	0.17	0.72	2.04	0.00093	0.034	0.74	0.18	0.77
GZMK	1.19	0.52	0.93	1.57	0.058	0.2	0.72	0.18	0.77
HAVCR2	1.04	0.79	0.99	1.35	0.021	0.11	1.01	0.96	0.97
HERC6	0.79	0.19	0.77	0.94	0.66	0.75	1.12	0.4	0.82
HGF	1.16	0.53	0.93	1.3	0.16	0.3	0.84	0.38	0.82
HIF1A	1.2	0.063	0.5	1.16	0.063	0.21	1.04	0.65	0.89
HLA_A	0.8	0.75	0.99	1.31	0.62	0.71	1.62	0.41	0.82
HLA_B	1.67	0.3	0.87	1.84	0.13	0.27	1.57	0.3	0.8
HLA_C	1.42	0.29	0.85	1.18	0.51	0.63	1.2	0.52	0.83
HLA_DMA	1.05	0.68	0.99	0.94	0.58	0.69	0.87	0.25	0.77
HLA_DMB	1.29	0.46	0.93	1.63	0.076	0.23	1.33	0.36	0.82
HLA_DOA	1.16	0.49	0.93	1.1	0.6	0.7	0.7	0.032	0.77
HLA_DOB	1.16	0.51	0.93	0.99	0.98	0.98	0.7	0.078	0.77
HLA_DPA1	1.33	0.54	0.93	1.32	0.39	0.53	1.15	0.7	0.89
HLA_DPB1	0.99	0.97	1	1.01	0.94	0.96	0.77	0.11	0.77
HLA_DQA1	1.4	0.28	0.84	1.22	0.46	0.59	0.65	0.13	0.77
HLA_DQA2	1.45	0.1	0.61	1.32	0.12	0.26	0.98	0.9	0.93
HLA_DQB2	1.54	0.096	0.6	1.56	0.028	0.12	0.91	0.64	0.89
HLA_DRA	1.11	0.53	0.93	1.06	0.65	0.75	0.81	0.17	0.77
HLA_DRB1	0.9	0.79	0.99	0.76	0.42	0.57	0.79	0.53	0.84
HLA_E	0.96	0.74	0.99	0.99	0.95	0.96	0.98	0.83	0.9
HLA_F	0.9	0.56	0.93	0.94	0.71	0.79	0.9	0.48	0.82
HLA_F_AS1	0.89	0.55	0.93	1.06	0.69	0.77	0.89	0.47	0.82
HLA_G	0.96	0.88	0.99	1.04	0.84	0.89	1.13	0.59	0.86
HMBS	0.97	0.78	0.99	0.94	0.47	0.6	0.88	0.092	0.77
ICAM1	1.01	0.96	1	1.27	0.13	0.26	1.1	0.54	0.85
ICOS	1.12	0.63	0.97	1.35	0.12	0.26	0.85	0.44	0.82
ICOSLG	1.19	0.18	0.74	1.13	0.21	0.36	0.97	0.76	0.9
ID2	1.44	0.041	0.45	1.65	0.00047	0.03	1.08	0.58	0.86
ID3	0.94	0.77	0.99	1.26	0.15	0.3	0.97	0.85	0.91
IDO1	0.79	0.37	0.9	1.11	0.62	0.71	0.95	0.83	0.9
IDO2	1.1	0.65	0.98	1.27	0.16	0.3	0.89	0.52	0.83
IFI27	0.62	0.012	0.29	0.7	0.017	0.1	0.93	0.67	0.89
IFI35	0.75	0.023	0.35	0.81	0.034	0.13	0.91	0.38	0.82
IFI44L	0.66	0.059	0.5	0.74	0.096	0.24	1.15	0.47	0.82
IFI6	0.62	0.0093	0.26	0.69	0.01	0.082	1.04	0.78	0.9
IFIH1	0.69	0.029	0.35	0.83	0.19	0.35	1.09	0.51	0.83
IFIT1	0.61	0.042	0.45	0.83	0.34	0.49	1.12	0.48	0.82
IFIT2	0.6	0.0016	0.21	0.72	0.017	0.1	1.08	0.58	0.86
IFIT3	0.64	0.023	0.35	0.8	0.18	0.33	1	1	1
IFITM1	0.77	0.052	0.5	0.76	0.012	0.087	1.03	0.81	0.9
IFITM2	0.92	0.5	0.93	0.85	0.12	0.26	0.94	0.6	0.86
IFNA17	0.94	0.79	0.99	1.12	0.54	0.66	1.03	0.87	0.92
IFNB1	0.87	0.47	0.93	0.97	0.86	0.9	1.1	0.6	0.86
IFNG	1.12	0.64	0.98	1.56	0.025	0.11	0.79	0.27	0.77
IGF1R	1.2	0.22	0.78	1.01	0.91	0.94	0.87	0.22	0.77
IGSF6	1.11	0.63	0.97	1.57	0.026	0.11	0.92	0.67	0.89
IKZF1	1.17	0.46	0.92	1.45	0.028	0.12	0.74	0.074	0.77
IKZF2	1.12	0.41	0.92	1.08	0.45	0.58	0.98	0.83	0.9
IKZF3	1.46	0.14	0.67	1.91	0.0015	0.036	0.83	0.37	0.82
IKZF4	1.29	0.17	0.72	1.43	0.013	0.092	1.1	0.49	0.83
IL10	1.75	0.0059	0.23	1.81	0.001	0.034	0.78	0.15	0.77
IL10RA	1.11	0.56	0.93	1.28	0.086	0.24	0.83	0.21	0.77
IL12A	1.37	0.21	0.78	0.99	0.94	0.96	0.79	0.22	0.77
IL12B	1.07	0.7	0.99	1.3	0.065	0.21	0.98	0.88	0.92
IL13	0.98	0.87	0.99	1.09	0.49	0.61	1.08	0.58	0.86
IL15	0.94	0.75	0.99	0.94	0.71	0.79	0.96	0.82	0.9
IL17A	0.84	0.0087	0.26	1.08	0.32	0.48	1.02	0.77	0.9
IL17F	1.15	0.044	0.46	1.04	0.35	0.49	0.98	0.74	0.89
IL18	1	1	1	1.2	0.17	0.31	0.99	0.92	0.95
IL1A	1.17	0.44	0.92	1.27	0.16	0.3	1.08	0.69	0.89
IL1B	1.1	0.66	0.99	1.37	0.07	0.22	1	0.98	0.99
IL2	1.28	0.027	0.35	1.15	0.12	0.26	0.9	0.3	0.8
IL21	1.22	0.21	0.78	1.48	0.0045	0.062	0.96	0.8	0.9
IL22	1.16	0.059	0.5	1.02	0.67	0.76	0.87	0.018	0.77
IL23A	1.38	0.077	0.52	1.17	0.27	0.44	0.86	0.33	0.82
IL2RA	1.2	0.42	0.92	1.25	0.23	0.39	0.73	0.092	0.77
IL2RB	0.84	0.43	0.92	1.13	0.49	0.61	0.79	0.19	0.77
IL2RG	1.11	0.68	0.99	1.59	0.023	0.11	0.86	0.43	0.82
IL3RA	1.03	0.87	0.99	1.25	0.11	0.26	0.84	0.25	0.77
IL4	0.98	0.83	0.99	1.03	0.63	0.73	1.01	0.92	0.95
IL6	1.32	0.28	0.84	1.94	0.0011	0.034	1.1	0.68	0.89
IL7	1.13	0.56	0.93	1.31	0.12	0.26	0.86	0.36	0.82
IL7R	1.36	0.24	0.79	1.85	0.0034	0.054	0.74	0.16	0.77
IRF1	0.8	0.087	0.56	0.94	0.58	0.69	0.97	0.77	0.9
IRF4	0.94	0.84	0.99	1.57	0.1	0.25	0.76	0.35	0.82
IRF9	0.84	0.072	0.52	0.83	0.02	0.11	1.05	0.59	0.86
IRS1	1.23	0.33	0.87	1.46	0.027	0.12	1.05	0.72	0.89
ISG15	0.54	0.00071	0.14	0.67	0.0049	0.062	1.05	0.73	0.89
ISG20	0.85	0.33	0.87	0.92	0.58	0.69	0.82	0.18	0.77
ITGA1	0.96	0.79	0.99	0.96	0.72	0.8	0.88	0.39	0.82
ITGAE	1.15	0.21	0.78	1.09	0.39	0.53	0.91	0.39	0.82
ITGAL	1.01	0.98	1	1.32	0.094	0.24	0.8	0.21	0.77
ITGAM	1.11	0.52	0.93	1.14	0.29	0.46	0.86	0.31	0.8
ITGAX	1.14	0.43	0.92	1.33	0.04	0.15	0.94	0.66	0.89
ITGB1	1.17	0.078	0.52	1.2	0.018	0.1	0.99	0.86	0.91
ITGB2	1.1	0.54	0.93	1.2	0.15	0.3	0.83	0.18	0.77
ITGB7	1.27	0.24	0.79	1.46	0.02	0.11	0.89	0.37	0.82
ITK	1.37	0.25	0.8	1.51	0.047	0.17	0.7	0.094	0.77
JAML	1.94	0.0038	0.23	2.25	2.3e-05	0.0046	0.79	0.2	0.77
JCHAIN	0.91	0.8	0.99	1.92	0.032	0.13	0.93	0.83	0.9
KIAA0101	0.95	0.73	0.99	0.79	0.083	0.24	0.89	0.4	0.82
KIR2DL1	1.01	0.8	0.99	1.05	0.14	0.28	1.03	0.36	0.82
KIR2DL2	1	0.97	1	1.02	0.54	0.66	1.03	0.51	0.83
KIR2DL3	1.13	0.39	0.91	1.29	0.034	0.13	1.06	0.68	0.89
KLF2	0.98	0.9	1	1.53	0.01	0.082	1.06	0.75	0.9
KLRB1	1.3	0.32	0.87	1.94	0.0034	0.054	0.9	0.63	0.88
KLRD1	1.47	0.07	0.52	1.56	0.018	0.1	0.9	0.6	0.86
KLRF1	1.29	0.22	0.78	1.33	0.097	0.24	0.96	0.82	0.9
KLRG1	1.64	0.005	0.23	1.41	0.011	0.086	0.77	0.091	0.77
KLRK1	1.39	0.18	0.74	1.59	0.018	0.1	0.77	0.23	0.77
KREMEN1	1.15	0.44	0.92	1.27	0.096	0.24	1.02	0.89	0.92
KRT5	1.29	0.45	0.92	1.38	0.23	0.39	0.96	0.87	0.92
KRT7	1.81	0.0058	0.23	1.14	0.46	0.59	0.85	0.33	0.82
LAG3	1.01	0.94	1	1.18	0.27	0.44	0.82	0.15	0.77
LAMP1	0.99	0.95	1	1.04	0.58	0.69	1.08	0.41	0.82
LAMP3	0.69	0.084	0.56	0.81	0.2	0.36	0.96	0.81	0.9
LAPTM5	1.18	0.34	0.87	1.26	0.11	0.26	0.83	0.24	0.77
LCK	1.77	0.0084	0.26	1.15	0.35	0.49	0.67	0.032	0.77
LCN2	1.06	0.84	0.99	0.86	0.48	0.6	0.81	0.37	0.82
LEXM	0.93	0.74	0.99	0.72	0.078	0.23	0.76	0.18	0.77
LILRB1	0.87	0.53	0.93	1.2	0.27	0.44	0.86	0.43	0.82
LILRB2	1.01	0.95	1	1.47	0.01	0.082	0.89	0.44	0.82
LMNA	0.93	0.54	0.93	1.07	0.42	0.57	1.05	0.59	0.86
LRG1	0.99	0.98	1	1.13	0.56	0.67	1.12	0.55	0.86
LRP1	1.02	0.85	0.99	1.06	0.57	0.68	0.89	0.31	0.8
LST1	1.28	0.29	0.85	1.37	0.087	0.24	0.87	0.42	0.82
LY9	1.36	0.23	0.79	1.67	0.011	0.086	0.83	0.4	0.82
LYZ	1.08	0.75	0.99	1.62	0.015	0.1	0.79	0.25	0.77
M6PR	1.08	0.28	0.84	1.03	0.66	0.75	0.92	0.21	0.77
MAD2L1	1.35	0.087	0.56	1.15	0.31	0.47	0.92	0.4	0.82
MADCAM1	1.26	0.23	0.79	1.26	0.13	0.27	1.03	0.85	0.91
MAGEA1	0.99	0.97	1	1.17	0.45	0.58	1.14	0.55	0.85
MAGEA10	4.54	1.5e-05	0.0061	1.25	0.32	0.48	0.47	0.013	0.77
MAGEA12	1.03	0.75	0.99	1	0.98	0.98	0.97	0.77	0.9
MAGEA3	1.3	0.14	0.67	1.04	0.78	0.84	0.88	0.44	0.82
MAGEA4	2.43	0.03	0.35	1.21	0.53	0.66	0.83	0.58	0.86
MAGEC2	1.04	0.91	1	0.82	0.49	0.61	0.82	0.51	0.83
MAPK1	0.95	0.65	0.98	0.98	0.74	0.81	1.02	0.8	0.9
MAPK14	1.05	0.52	0.93	0.99	0.92	0.95	0.98	0.74	0.89
MELK	0.94	0.73	0.99	0.86	0.28	0.45	0.9	0.4	0.82
MIF	0.98	0.82	0.99	0.84	0.019	0.11	0.93	0.38	0.82
MKI67	1.11	0.57	0.93	0.81	0.21	0.37	0.75	0.072	0.77
MLANA	0.96	0.79	0.99	0.9	0.17	0.31	0.92	0.33	0.82
MMP2	0.84	0.49	0.93	1.05	0.83	0.89	0.72	0.17	0.77
MMP9	1.02	0.96	1	1.14	0.59	0.7	0.73	0.22	0.77
MPO	1.68	0.016	0.34	1.35	0.089	0.24	0.95	0.81	0.9
MRC1	1.46	0.1	0.6	2.01	0.00011	0.015	0.9	0.5	0.83
MS4A1	1.03	0.93	1	1.57	0.081	0.24	0.72	0.27	0.77
MTOR	1.12	0.22	0.78	1.03	0.69	0.77	1.01	0.93	0.95
MX1	0.59	0.0031	0.23	0.62	0.00059	0.03	1.01	0.94	0.96
MYC	0.78	0.05	0.5	0.88	0.26	0.43	1.23	0.086	0.77
NCAM1	1.03	0.91	1	1.06	0.78	0.84	1.03	0.88	0.92
NCF1	1.13	0.54	0.93	1.32	0.083	0.24	0.82	0.26	0.77
NCR1	1.21	0.32	0.87	1.57	0.0056	0.062	1.04	0.81	0.9
NCR3	1.24	0.34	0.87	1.56	0.013	0.092	0.82	0.3	0.8
NECTIN2	1.01	0.92	1	1.02	0.89	0.93	1.02	0.88	0.92
NFATC1	1.05	0.78	0.99	1.37	0.026	0.11	1.11	0.43	0.82
NFKBIA	0.97	0.76	0.99	1.01	0.94	0.96	1.15	0.14	0.77
NKG7	1.06	0.8	0.99	1.45	0.053	0.18	0.75	0.12	0.77
NOS2	0.92	0.62	0.97	1.32	0.11	0.26	1.04	0.81	0.9
NOTCH3	1.33	0.024	0.35	1.1	0.38	0.53	0.81	0.056	0.77
NRP1	0.99	0.94	1	1.01	0.93	0.95	0.91	0.41	0.82
NT5E	0.7	0.13	0.67	0.99	0.95	0.97	0.86	0.43	0.82
NTN3	1.55	0.056	0.5	1.32	0.12	0.26	0.83	0.32	0.81
OAS1	0.69	0.019	0.35	0.77	0.052	0.18	1.05	0.75	0.9
OAS2	0.58	0.0065	0.23	0.8	0.16	0.3	1.2	0.27	0.77
OAS3	0.64	0.01	0.27	0.73	0.022	0.11	0.99	0.94	0.96
PDCD1	1.24	0.34	0.87	1.39	0.066	0.21	0.84	0.32	0.81
PDCD1LG2	0.92	0.71	0.99	1.21	0.31	0.47	0.76	0.13	0.77
PECAM1	0.68	0.15	0.69	0.83	0.39	0.53	0.94	0.81	0.9
PGF	1.24	0.27	0.84	1.25	0.16	0.3	0.77	0.088	0.77
PIK3CA	1.14	0.35	0.88	1.1	0.39	0.53	1.03	0.73	0.89
PIK3CD	1.17	0.21	0.78	1.05	0.61	0.71	0.8	0.036	0.77
PMEL	1.17	0.36	0.88	1.12	0.42	0.57	0.86	0.28	0.78
POLR2A	1.09	0.42	0.92	1.08	0.32	0.48	0.97	0.73	0.89
POU2AF1	0.94	0.85	0.99	1.54	0.1	0.25	0.77	0.37	0.82
PRDM1	1.41	0.098	0.6	1.7	0.0021	0.043	0.81	0.19	0.77
PRF1	0.9	0.58	0.94	1.48	0.021	0.11	1	0.99	0.99
PSMB9	0.71	0.019	0.35	0.72	0.0087	0.074	0.9	0.42	0.82
PTEN	1.16	0.47	0.93	1.45	0.019	0.11	1.18	0.27	0.77
PTGS2	1.72	0.028	0.35	2.31	6.1e-06	0.0024	1.27	0.26	0.77
PTK7	1.36	0.025	0.35	1.12	0.27	0.44	0.96	0.67	0.89
PTPN11	1.18	0.021	0.35	1.1	0.12	0.26	1.03	0.65	0.89
PTPN6	1.22	0.062	0.5	1.13	0.12	0.26	0.85	0.047	0.77
PTPN7	1.08	0.68	0.99	1.23	0.17	0.32	0.75	0.071	0.77
PTPRC	1.24	0.42	0.92	1.72	0.016	0.1	0.75	0.22	0.77
PTPRCAP	1.16	0.46	0.92	1.27	0.14	0.28	0.86	0.37	0.82
PVR	1.01	0.89	1	1	0.96	0.98	1.06	0.49	0.83
PYGL	1.16	0.31	0.87	1.01	0.9	0.94	0.98	0.82	0.9
RB1	1.29	0.14	0.67	1.44	0.0058	0.062	0.96	0.73	0.89
RORC	1.01	0.95	1	1.02	0.91	0.94	0.88	0.48	0.82
RPS6	1.08	0.49	0.93	0.97	0.68	0.77	1.06	0.54	0.84
S100A8	1.44	0.19	0.77	2.09	0.00058	0.03	1.1	0.69	0.89
S100A9	1.21	0.48	0.93	1.67	0.009	0.074	1.1	0.68	0.89
SAMHD1	0.95	0.7	0.99	1.21	0.1	0.25	1.06	0.59	0.86
SDHA	1.02	0.84	0.99	1.05	0.48	0.6	1.02	0.69	0.89
SELL	1.14	0.6	0.95	1.4	0.086	0.24	0.78	0.25	0.77
SH2D1A	1.1	0.72	0.99	1.61	0.036	0.14	0.78	0.31	0.81
SH2D1B	1.31	0.23	0.79	1.81	0.0013	0.036	1.05	0.8	0.9
SIT1	1.05	0.85	0.99	1.3	0.23	0.38	0.68	0.085	0.77
SKAP2	1.06	0.72	0.99	1.43	0.0038	0.057	1.02	0.88	0.92
SLAMF7	1.16	0.59	0.94	1.77	0.021	0.11	0.76	0.29	0.79
SLAMF8	1.05	0.8	0.99	1.15	0.43	0.57	0.75	0.13	0.77
SNAI1	1.22	0.27	0.84	1.35	0.049	0.17	0.89	0.44	0.82
SNAI2	1.07	0.79	0.99	1.26	0.3	0.46	0.76	0.23	0.77
SRGN	1.08	0.59	0.94	1.31	0.029	0.12	1	0.98	0.99
SSX2	1.43	0.13	0.67	1.14	0.5	0.62	0.81	0.35	0.82
STAT1	0.81	0.063	0.5	0.85	0.12	0.26	0.91	0.43	0.82
STAT3	1.04	0.55	0.93	1.05	0.41	0.55	0.96	0.59	0.86
STAT4	1.25	0.34	0.87	1.58	0.0082	0.074	0.72	0.083	0.77
STAT5A	1.15	0.23	0.79	1.16	0.12	0.26	0.87	0.12	0.77
STAT6	0.98	0.87	0.99	0.92	0.27	0.44	0.96	0.6	0.86
TAGAP	1.21	0.38	0.91	1.66	0.0056	0.062	0.8	0.21	0.77
TAP1	0.79	0.18	0.74	0.83	0.19	0.34	0.85	0.22	0.77
TARP	0.99	0.98	1	1.37	0.13	0.26	0.84	0.43	0.82
TBP	1.21	0.14	0.67	1.17	0.1	0.25	1.01	0.82	0.9
TBX21	1.34	0.24	0.79	2.09	0.00024	0.023	0.89	0.54	0.85
TCF7	1.3	0.17	0.72	1.12	0.42	0.56	0.81	0.13	0.77
TDO2	0.77	0.34	0.87	0.74	0.18	0.33	0.52	0.0049	0.77
TFRC	1.09	0.4	0.92	0.99	0.93	0.95	1.07	0.51	0.83
TGFB1	1.07	0.58	0.94	1.34	0.0054	0.062	0.95	0.68	0.89
TIGIT	1.24	0.41	0.92	1.26	0.3	0.46	0.69	0.098	0.77
TLR3	1.14	0.54	0.93	1.15	0.47	0.6	1.07	0.67	0.89
TLR7	1.38	0.17	0.72	1.4	0.084	0.24	0.81	0.27	0.77
TLR8	1.38	0.14	0.67	1.68	0.0048	0.062	0.8	0.26	0.77
TLR9	1.16	0.37	0.9	1.03	0.82	0.87	0.83	0.14	0.77
TNF	0.87	0.52	0.93	0.98	0.92	0.95	0.95	0.78	0.9
TNFAIP8	0.92	0.68	0.99	1.13	0.43	0.57	0.95	0.65	0.89
TNFRSF14	0.85	0.18	0.74	1.07	0.5	0.62	1.04	0.71	0.89
TNFRSF17	1.2	0.57	0.93	1.76	0.035	0.14	0.9	0.72	0.89
TNFRSF18	1.22	0.42	0.92	1.28	0.2	0.36	0.75	0.13	0.77
TNFRSF4	1	0.99	1	0.91	0.56	0.67	0.74	0.061	0.77
TNFRSF9	1.39	0.2	0.77	1.26	0.29	0.46	0.67	0.047	0.77
TNFSF10	0.61	0.0037	0.23	0.78	0.079	0.23	0.95	0.73	0.89
TNFSF13B	0.83	0.36	0.88	1.32	0.096	0.24	1.1	0.56	0.86
TNFSF14	1.22	0.48	0.93	1.15	0.56	0.67	0.66	0.087	0.77
TNFSF18	1.22	0.38	0.91	1.32	0.11	0.26	1.06	0.77	0.9
TNFSF4	1.32	0.14	0.67	1.18	0.29	0.45	0.75	0.073	0.77
TNFSF9	0.76	0.2	0.77	1.33	0.12	0.26	1.18	0.37	0.82
TOP2A	1.18	0.22	0.78	0.85	0.16	0.3	0.79	0.074	0.77
TP63	1.01	0.97	1	1.19	0.27	0.44	0.79	0.2	0.77
TRIM29	1.33	0.29	0.85	0.96	0.85	0.9	0.83	0.4	0.82
TUBB	1.02	0.79	0.99	1.02	0.73	0.8	0.97	0.65	0.89
TWIST1	1.08	0.76	0.99	1.12	0.6	0.7	0.82	0.38	0.82
TYROBP	1.03	0.89	0.99	1.31	0.081	0.24	0.89	0.46	0.82
VCAM1	0.96	0.86	0.99	1.03	0.89	0.93	0.72	0.13	0.77
VEGFA	1.12	0.46	0.92	0.84	0.14	0.28	0.88	0.3	0.8
VTCN1	1.32	0.36	0.88	1	0.99	0.99	0.84	0.53	0.84
XAGE1B	1.64	0.13	0.67	1.66	0.064	0.21	1.05	0.88	0.92
ZAP70	1.14	0.55	0.93	1.38	0.049	0.17	0.78	0.18	0.77
ZBTB46	1.1	0.54	0.93	0.92	0.49	0.62	0.89	0.27	0.77
ZEB1	0.9	0.6	0.94	1.25	0.19	0.35	0.88	0.48	0.82
