# Supplementary material for: RB1 expression and HR proficiency define a poor-outcome molecular subtype of high grade serous ovarian carcinoma
Source: Research Square preprint supplement (doi:10.21203/rs.3.rs-5523163/v1), 2025-07-14
Supplement: Supplementary file 9 [file aee97c4daba2bbed84031e09.xlsx]

## Sheet: Sheet1
Supplemental Table 8. Molecular characteristics and gene expression differences in BRCAa and HRi HGSOC with high RB1 mRNA expression.
RB1-High
	All patients (RB1-High)		BRCAa (RB1-High)		NBHRa (RB1-High)		HRi (RB1-High)		BRCAa vs NBHRa		BRCAa vs HRi		NBHRa vs HRi
Variable	N	Frequency	N	Frequency	N	Frequency	N	Frequency	OR	P	OR	P	OR	P
Total number of patients	292		49		78		91
TMB mutations/Mb (Mean±SD)	217	4.2±2.4	48	4.5±3	78	4.1±2.1	91	4±2.3	-	0.25	-	0.28	-	0.035
TMB high/not high (N & %)	217		48		78		91
High (≥10)		5 (2.3%)		3 (6.2%)		1 (1.3%)		1 (1.1%)
Not high (<10)		212 (97.7%)		45 (93.8%)		77 (98.7%)		90 (98.9%)	0.11 [0.01-0.73]	0.022	0.19 [0.02-1.25]	0.085	1.64 [0.12-20.97]	0.68
PD-L1 score (Mean±SD)	217	2.7±7.1	49	3.9±10.5	77	2.3±6.4	91	2.4±5.1	-	0.15	-	0.26	-	0.88
PD-L1 negative/positive (N & %)	217		49		77		91
Negative		127 (58.5%)		28 (57.1%)		49 (63.6%)		50 (54.9%)
Positive (≥1)		90 (41.5%)		21 (42.9%)		28 (36.4%)		41 (45.1%)	0.99 [0.4-2.56]	0.99	1.13 [0.56-2.3]	0.74	0.92 [0.43-1.94]	0.84
TIGS score (Mean±SD)	218	49±20.6	49	42.6±19.4	78	50.8±18.9	91	51±22	-	0.44	-	0.025	-	0.38
TIGS strong/moderate/weak (N & %)	218		49		78		91
Strong		70 (32.1%)		9 (18.4%)		24 (30.8%)		37 (40.7%)	1.13 [0.42-3.2]	0.81	2.98 [1.35-7.1]	0.0061	1.25 [0.59-2.65]	0.56
Moderate		61 (28%)		14 (28.6%)		28 (35.9%)		19 (20.9%)	1.06 [0.42-2.77]	0.9	0.63 [0.29-1.41]	0.26	0.55 [0.24-1.2]	0.14
Weak		87 (39.9%)		26 (53.1%)		26 (33.3%)		35 (38.5%)	0.81 [0.32-2.08]	0.65	0.57 [0.28-1.13]	0.11	1.39 [0.66-2.9]	0.38
CP score (Mean±SD)	218	50.9±24.2	49	54.8±22.8	78	52.4±22.8	91	47.5±25.8	-	0.83	-	0.11	-	0.4
CP high/moderate/poor (N & %)	218		49		78		91
High		69 (31.7%)		18 (36.7%)		23 (29.5%)		28 (30.8%)	0.81 [0.32-2.14]	0.66	0.76 [0.37-1.58]	0.46	1.18 [0.55-2.53]	0.66
Moderate		87 (39.9%)		20 (40.8%)		36 (46.2%)		31 (34.1%)	1.38 [0.56-3.53]	0.48	0.78 [0.38-1.59]	0.49	0.55 [0.26-1.13]	0.11
Poor		62 (28.4%)		11 (22.4%)		19 (24.4%)		32 (35.2%)	0.79 [0.3-2.25]	0.66	1.76 [0.82-3.97]	0.15	1.71 [0.78-3.74]	0.18
CTAB score (Mean±SD)	218	318.8±227.4	49	232.6±163.3	78	362.8±231.3	91	327.6±242.6	-	0.026	-	0.011	-	0.36
CTAB high/low (N & %)	218		49		78		91
High		147 (67.4%)		26 (53.1%)		60 (76.9%)		61 (67%)
Low		71 (32.6%)		23 (46.9%)		18 (23.1%)		30 (33%)	4.01 [1.57-10.65]	0.0036	1.83 [0.9-3.73]	0.093	0.6 [0.27-1.33]	0.21
RB1 nRPM (Mean±SD)	218	1557.9±879.3	49	1499±783.3	78	1613.3±922.4	91	1542.2±896.8	-	0.67	-	0.68	-	0.99
BRCA1 nRPM (Mean±SD)	218	162.6±103	49	138.2±96.1	78	176.5±100.9	91	163.9±107.1	-	0.066	-	0.25	-	0.23
BRCA2 nRPM (Mean±SD)	218	237.1±185.5	49	225.6±145.2	78	207.1±139.8	91	268.9±230.4	-	0.94	-	0.25	-	0.46
CD3 nRPM (Mean±SD)	218	471.1±581.5	49	343.8±374.4	78	497.2±530.1	91	517.1±698.9	-	0.73	-	0.073	-	0.24
CD68 nRPM (Mean±SD)	218	2891.3±2624.4	49	2022.6±1562.5	78	2999.4±2326.2	91	3266.4±3179.9	-	0.63	-	0.02	-	0.61
MS4A1 nRPM (Mean±SD)	217	82.3±243.2	49	82.6±371.8	78	109.4±260	90	58.5±96.4	-	0.65	-	0.055	-	0.32
PTEN nRPM (Mean±SD)	218	3013.3±2014.2	49	2954±2154.4	78	2796.6±1905.4	91	3231.1±2027.2	-	0.6	-	0.28	-	0.2
MKI67 nRPM (Mean±SD)	218	1154.4±1041	49	1237.1±1008.3	78	1205.8±1162	91	1065.8±949.4	-	0.82	-	0.14	-	0.11
