# Supplementary material for: RB1 expression and HR proficiency define a poor-outcome molecular subtype of high grade serous ovarian carcinoma
Source: Research Square preprint supplement (doi:10.21203/rs.3.rs-5523163/v1), 2025-07-14
Supplement: Supplementary file 10 [file dd68a49ab888eb9619092eb3.xlsx]

## Sheet: Supplemental Table 11
	Supplemental Table 11. DEG lists and pathway analysis results.
	Summary of Differentially Expressed Genes						Differentially Expressed Gene Lists and Pathway Analysis
	Stratified by HR Gene Status						BRCA vs HRi (all)								RB1-Low (All) vs RB1-High (All)								BRCAa RB1-Low vs BRCAa RB1-High							HRi RB1-Low vs HRi RB1-High								RB1-Low BRCAa vs RB1-Low HRi								RB1-High BRCAa vs RB1-High HRi
		BRCAa vs HRi (all)	BRCAa vs NBHRa (all)	NBHRa vs HRi (all)
	# Elevated in First Group	14	5	0			DEGs Elevated in BRCAa (n=14)		Pathway Analysis						DEGs Elevated in RB1-Low (n=9)		Pathway Analysis						DEGs Elevated in BRCAa RB1-Low (n=10)	Pathway Analysis						DEGs Elevated in HRi RB1-Low (n=5)		Pathway Analysis						DEGs Elevated in RB1-Low BRCAa (n=7)		Pathway Analysis						DEGs Elevated in RB1-High BRCAa (n=8)		Pathway Analysis
	# Elevated in Second Group	97	6	0			AKT1		Overrepresented Reactome Pathways	# DEGs (%)	Fold Enrichment	Raw P-Value	FDR		ABCF1		Overrepresented Reactome Pathways	# DEGs (%)	Fold Enrichment	Raw P-Value	FDR		CD276	Overrepresented Reactome Pathways	# DEGs (%)	Fold Enrichment	Raw P-Value	FDR		ABCF1		Overrepresented Reactome Pathways	# DEGs (%)	Fold Enrichment	Raw P-Value	FDR		ABCF1		Overrepresented Reactome Pathways	# DEGs (%)	Fold Enrichment	Raw P-Value	FDR		CCNB2		Overrepresented Reactome Pathways	# DEGs (%)
	Total #	111	11	0			BST2		Interferon alpha/beta signaling (R-HSA-909733)	11 (78.6%)	>100	2.95e-25	7.72e-22		AKT1		No statistically significant overexpressed pathways.	-	-	-	-		CTAG1B	No statistically significant overexpressed pathways.	-	-	-	-		CD276		No statistically significant overexpressed pathways.	-	-	-	-		CD276		Interferon alpha/beta signaling (R-HSA-909733)	5 (71.4%)	> 100	1.25e-11	3.29e-08		IFI6		Interferon alpha/beta signaling (R-HSA-909733)	3 (37.5%)
							EIF2AK2		ISG15 antiviral mechanism (R-HSA-1169408)	3 (21.4%)	62.11	1.39e-05	0.00608		CD276								GAGE1/12I/12F							GADD45GIP1								GADD45GIP1		Interferon Signaling (R-HSA-913531)	5 (71.4%)	55.06	7.28e-09	9.53e-06		IFIT1		Cytokine Signaling in Immune system (R-HSA-1280215)	5 (62.5%)
	HR-Related Groups Stratified by RB1 Status						IFI27		Interferon Signaling (R-HSA-913531)	11 (78.6%)	60.56	5.02e-19	4.38e-16		CTAG1B								GAGE13							HMBS								HMBS		Cytokine Signaling in Immune system (R-HSA-1280215)	6 (85.7%)	22.97	1.8e-08	1.57e-05		IFIT2
		RB1-Low vs RB1-High (all)	BRCAa (RB1-Low vs Rb1-High)	HRi (RB1-Low vs Rb1-High)	NBHRa (RB1-Low vs Rb1-High)		IFI35		Antiviral mechanism by IFN-stimulated genes (R-HSA-1169410)	4 (28.6%)	40	2.37e-06	0.00124		EFNA4								GAGE2C/2A/2E							LCK								LCK		Immune System (R-HSA-168256)	6 (85.7%)	8.42	7.05e-06	0.00461		KIAA0101
	# Elevated in RB1-Low Subgroup	9	10	5	5		IFI6		Cytokine Signaling in Immune system (R-HSA-1280215)	14 (100.0%)	26.8	9.06e-21	1.19e-17		GADD45GIP1								ISG20																							LCN2
	# Elevated in RB1-High Subgroup	276	96	213	209		IFIT2		Immune System (R-HSA-168256)	14 (100.0%)	9.83	1.23e-14	8.03e-12		HMBS								LMNA																							MIF
	Total #	285	106	218	213		IFITM1								ISG20								MAGEC2																							ZBTB46
							IRF9								NTN3								TNFSF9
	RB1-Low Groups Stratified by HR Gene Status						ISG15																XAGE1B
		BRCAa vs HRi (RB1-Low)	BRCAa vs NBHRa (RB1-Low)	NBHRa vs HRi (RB1-Low)			MIF
	# Elevated in First Group	7	0	0			MX1
	# Elevated in Second Group	0	2	0			OAS3
	Total #	7	2	0			PSMB9
	RB1-High Groups Stratified by HR Gene Status
		BRCAa vs HRi (RB1-High)	BRCAa vs NBHRa (RB1-High)	NBHRa vs HRi (RB1-High)			DEGs Elevated in HRi (n=97)		Pathway Analysis						DEGs Elevated in RB1-High (n=276)		Pathway Analysis						DEGs Elevated in BRCAa RB1-High (n=96)	Pathway Analysis						DEGs Elevated in HRi RB1-High (n=213)		Pathway Analysis						DEGs Elevated in RB1-Low HRi (n=0)		Pathway Analysis						DEGs Elevated in RB1-High HRi (n=80)		Pathway Analysis
	# Elevated in First Group	8	1	0			ADORA2A		Overrepresented Reactome Pathways	# DEGs (%)	Fold Enrichment	Raw P-Value	FDR		ADGRE5		Overrepresented Reactome Pathways	# DEGs (%)	Fold Enrichment	Raw P-Value	FDR		BRCA2	Overrepresented Reactome Pathways	# DEGs (%)	Fold Enrichment	Raw P-Value	FDR		BCL6		Overrepresented Reactome Pathways	# DEGs (%)	Fold Enrichment	Raw P-Value	FDR		-		Overrepresented Reactome Pathways	# DEGs (%)	Fold Enrichment	Raw P-Value	FDR		AIF1		Overrepresented Reactome Pathways	# DEGs (%)
	# Elevated in Second Group	80	0	0			AIF1		Epithelial-Mesenchymal Transition (EMT) during gastrulation (R-HSA-9758919)	2 (2.1%)	> 100	0.000131	0.0143		ADORA2A		Binding and entry of HIV virion (R-HSA-173107)	3 (1.1%)	55.12	9.87e-06	0.000359		CA4	Binding and entry of HIV virion (R-HSA-173107)	2 (2.1%)	> 100	0.000128	0.00716		BRCA2		MET activates STAT3 (R-HSA-8875791)	2 (1.0%)	64.72	0.000315	0.00756				No differentially expressed genes w/ FDR <0.25						BATF		Epithelial-Mesenchymal Transition (EMT) during gastrulation (R-HSA-9758919)	2 (2.5%)
	Total #	88	1	0			BATF		CD163 mediating an anti-inflammatory response (R-HSA-9662834)	3 (3.1%)	70.72	8.35e-06	0.00146		AIF1		MET activates STAT3 (R-HSA-8875791)	2 (0.7%)	49	0.000548	0.0108		CCNB2	Activated NTRK3 signals through PI3K (R-HSA-9603381)	2 (2.1%)	71.46	0.000319	0.0149		BST2		MET activates PTPN11 (R-HSA-8865999)	2 (1.0%)	48.54	0.000625	0.0141										CCL18		Cross-presentation of particulate exogenous antigens (phagosomes) (R-HSA-1236973)	2 (2.5%)
							BCL2		Metal sequestration by antimicrobial proteins (R-HSA-6799990)	2 (2.1%)	70.72	0.000326	0.0284		ALOX15B		Interleukin-21 signaling (R-HSA-9020958)	6 (2.2%)	44.1	1.21e-09	9.03e-08		CCR5	PTK6 promotes HIF1A stabilization (R-HSA-8857538)	2 (2.1%)	71.46	0.000319	0.0147		BTLA		Binding and entry of HIV virion (R-HSA-173107)	2 (1.0%)	48.54	0.000625	0.014										CCL2		Interleukin-10 signaling (R-HSA-6783783)	8 (10.0%)
	*Pathway analysis performed for highlighted comparison groups						BTLA		Interleukin-21 signaling (R-HSA-9020958)	3 (3.1%)	63.65	1.19e-05	0.00195		AXL		MET activates PTPN11 (R-HSA-8865999)	2 (0.7%)	36.75	0.00109	0.0192		CCR6	RUNX1 and FOXP3 control the development of regulatory T lymphocytes (Tregs) (R-HSA-8877330)	3 (3.1%)	64.31	1.15e-05	0.00104		BUB1		Epithelial-Mesenchymal Transition (EMT) during gastrulation (R-HSA-9758919)	2 (1.0%)	48.54	0.000625	0.0139										CCL22		Nuclear events stimulated by ALK signaling in cancer (R-HSA-9725371)	4 (5.0%)
							C10orf54		Interleukin-10 signaling (R-HSA-6783783)	7 (7.2%)	33	1.63e-09	5.32e-07		BCL2		Epithelial-Mesenchymal Transition (EMT) during gastrulation (R-HSA-9758919)	2 (0.7%)	36.75	0.00109	0.0191		CD1C	Signal regulatory protein family interactions (R-HSA-391160)	4 (4.2%)	61.25	4.29e-07	7.03e-05		C1QB		STAT3 nuclear events downstream of ALK signaling (R-HSA-9701898)	5 (2.4%)	44.13	4.86e-08	3.44e-06										CCL3		RHO GTPases Activate NADPH Oxidases (R-HSA-5668599)	3 (3.8%)
							CCL18		DAP12 signaling (R-HSA-2424491)	3 (3.1%)	25.46	0.000217	0.021		BCL2L11		Interleukin-10 signaling (R-HSA-6783783)	22 (8.0%)	35.93	1.18e-29	3.87e-27		CD2	STAT3 nuclear events downstream of ALK signaling (R-HSA-9701898)	3 (3.1%)	58.47	1.58e-05	0.00133		CBLB		Signaling by Leptin (R-HSA-2586552)	4 (1.9%)	43.14	1.32e-06	6.94e-05										CCL4		Translocation of ZAP-70 to Immunological synapse (R-HSA-202430)	3 (3.8%)
							CCL22		Interleukin-7 signaling (R-HSA-1266695)	3 (3.1%)	25.46	0.000217	0.0203		BCL6		Chemokine receptors bind chemokines (R-HSA-380108)	26 (9.4%)	33.53	7.75e-34	3.38e-31		CD244	PECAM1 interactions (R-HSA-210990)	3 (3.1%)	58.47	1.58e-05	0.00129		CCL17		Interleukin-9 signaling (R-HSA-8985947)	4 (1.9%)	43.14	1.32e-06	6.8e-05										CD160		TNFs bind their physiological receptors (R-HSA-5669034)	3 (3.8%)
							CCL3		Interleukin-4 and Interleukin-13 signaling (R-HSA-6785807)	13 (13.4%)	24.85	5.07e-15	2.21e-12		BRCA2		STAT3 nuclear events downstream of ALK signaling (R-HSA-9701898)	5 (1.8%)	33.41	1.94e-07	1.11e-05		CD28	Regulation of IFNG signaling (R-HSA-877312)	3 (3.1%)	53.59	2.1e-05	0.00167		CCL18		Signal regulatory protein family interactions (R-HSA-391160)	6 (2.9%)	41.6	3.12e-09	2.92e-07										CD1C		Phosphorylation of CD3 and TCR zeta chains (R-HSA-202427)	3 (3.8%)
							CCL4		Interleukin-2 family signaling (R-HSA-451927)	5 (5.2%)	24.11	1.97e-06	0.000469		BTLA		PD-1 signaling (R-HSA-389948)	13 (4.7%)	32.95	2.31e-17	3.79e-15		CD38	Trafficking and processing of endosomal TLR (R-HSA-1679131)	3 (3.1%)	49.47	2.72e-05	0.00198		CCL2		Interleukin-10 signaling (R-HSA-6783783)	19 (9.1%)	40.99	1.49e-26	7.81e-24										CD226		PD-1 signaling (R-HSA-389948)	3 (3.8%)
							CCR6		Signaling by ALK (R-HSA-201556)	3 (3.1%)	22.73	0.000305	0.0276		BUB1		CD163 mediating an anti-inflammatory response (R-HSA-9662834)	4 (1.4%)	32.67	4e-06	0.000178		CD40LG	Signaling by Leptin (R-HSA-2586552)	2 (2.1%)	47.64	0.000759	0.0297		CCL21		PD-1 signaling (R-HSA-389948)	12 (5.8%)	40.17	4.64e-17	1.01e-14										CD244		Interleukin-4 and Interleukin-13 signaling (R-HSA-6785807)	11 (13.8%)
							CD163		Generation of second messenger molecules (R-HSA-202433)	4 (4.1%)	21.22	3.72e-05	0.00541		C10orf54		Signaling by Leptin (R-HSA-2586552)	4 (1.4%)	32.67	4e-06	0.000175		CD44	Interleukin-1 processing (R-HSA-448706)	2 (2.1%)	47.64	0.000759	0.0292		CCL3		Interleukin-21 signaling (R-HSA-9020958)	4 (1.9%)	38.83	2.19e-06	0.000102										CD27		Immunoregulatory interactions between a Lymphoid and a non-Lymphoid cell (R-HSA-198933)	15 (18.8%)
							CD1C		CD28 co-stimulation (R-HSA-389356)	3 (3.1%)	20.53	0.000415	0.0329		C1QB		Interleukin-9 signaling (R-HSA-8985947)	4 (1.4%)	32.67	4e-06	0.000172		CD47	PI3K/AKT activation (R-HSA-198203)	2 (2.1%)	47.64	0.000759	0.0288		CCL4		MET activates PI3K/AKT signaling (R-HSA-8851907)	2 (1.0%)	38.83	0.00103	0.0208										CD274		Chemokine receptors bind chemokines (R-HSA-380108)	4 (5.0%)
							CD1D		Immunoregulatory interactions between a Lymphoid and a non-Lymphoid cell (R-HSA-198933)	19 (19.6%)	20.46	6.57e-20	5.74e-17		CA4		Interleukin-23 signaling (R-HSA-9020933)	4 (1.4%)	32.67	4e-06	0.000169		CD69	Signaling by ALK (R-HSA-201556)	6 (6.3%)	45.94	3.05e-09	9.98e-07		CCL5		MET interacts with TNS proteins (R-HSA-8875513)	2 (1.0%)	38.83	0.00103	0.0207										CD48		Signaling by ALK fusions and activated point mutants (R-HSA-9725370)	5 (6.3%)
							CD226		Nuclear events stimulated by ALK signaling in cancer (R-HSA-9725371)	3 (3.1%)	19.89	0.000456	0.0351		CBLB		Signal regulatory protein family interactions (R-HSA-391160)	6 (2.2%)	31.5	1.65e-08	1.11e-06		CD74	GAB1 signalosome (R-HSA-180292)	3 (3.1%)	40.2	5.27e-05	0.00329		CCR4		MAPK1 (ERK2) activation (R-HSA-112411)	3 (1.4%)	36.4	5.81e-05	0.00183										CD52		Signaling by ALK in cancer (R-HSA-9700206)	5 (6.3%)
							CD244		Chemokine receptors bind chemokines (R-HSA-380108)	5 (5.2%)	18.61	7.23e-06	0.00135		CCL17		Interleukin-35 Signalling (R-HSA-8984722)	5 (1.8%)	30.63	3.3e-07	1.8e-05		CDKN3	Platelet sensitization by LDL (R-HSA-432142)	3 (3.1%)	37.83	6.38e-05	0.00389		CCR5		Interleukin-6 signaling (R-HSA-1059683)	4 (1.9%)	35.3	3.41e-06	0.000152										CD53		Signaling by Interleukins (R-HSA-449147)	18 (22.5%)
							CD247		Costimulation by the CD28 family (R-HSA-388841)	6 (6.2%)	17.68	1.14e-06	0.000299		CCL18		RUNX1 and FOXP3 control the development of regulatory T lymphocytes (Tregs) (R-HSA-8877330)	4 (1.4%)	29.4	6.6e-06	0.000251		CEACAM1	Specification of primordial germ cells (R-HSA-9827857)	2 (2.1%)	35.73	0.00138	0.0488		CCR6		Interleukin-35 Signalling (R-HSA-8984722)	4 (1.9%)	32.36	5.08e-06	0.000218										CD68		Adaptive Immune System (R-HSA-1280218)	26 (32.5%)
							CD28		Interleukin-12 family signaling (R-HSA-447115)	4 (4.1%)	15.15	0.000141	0.0148		CCL2		G2/M DNA replication checkpoint (R-HSA-69478)	2 (0.7%)	29.4	0.0018	0.0301		CTLA4	Interleukin-2 signaling (R-HSA-9020558)	2 (2.1%)	35.73	0.00138	0.0481		CCR7		CHL1 interactions (R-HSA-447041)	3 (1.4%)	32.36	8.65e-05	0.00263										CD79A		Cell surface interactions at the vascular wall (R-HSA-202733)	6 (7.5%)
							CD44		Signaling by ALK fusions and activated point mutants (R-HSA-9725370)	5 (5.2%)	11.92	6.36e-05	0.00833		CCL21		MET activates PI3K/AKT signaling (R-HSA-8851907)	2 (0.7%)	29.4	0.0018	0.0299		CX3CL1	Interleukin-35 Signalling (R-HSA-8984722)	2 (2.1%)	35.73	0.00138	0.0475		CD1C		CD163 mediating an anti-inflammatory response (R-HSA-9662834)	3 (1.4%)	32.36	8.65e-05	0.0026										CD8A		Cytokine Signaling in Immune system (R-HSA-1280215)	23 (28.8%)
							CD48		Signaling by ALK in cancer (R-HSA-9700206)	5 (5.2%)	11.92	6.36e-05	0.00794		CCL22		FasL/ CD95L signaling (R-HSA-75157)	2 (0.7%)	29.4	0.0018	0.0298		CXCL1	Interleukin-10 signaling (R-HSA-6783783)	7 (7.3%)	33.35	1.51e-09	5.65e-07		CD2		Interleukin-1 processing (R-HSA-448706)	3 (1.4%)	32.36	8.65e-05	0.00257										CRTAM		Immune System (R-HSA-168256)	50 (62.5%)
							CD52		PI3K/AKT Signaling in Cancer (R-HSA-2219528)	5 (5.2%)	11.53	7.46e-05	0.00888		CCL3		MET interacts with TNS proteins (R-HSA-8875513)	2 (0.7%)	29.4	0.0018	0.0296		CXCR2	Interleukin receptor SHC signaling (R-HSA-912526)	4 (4.2%)	32.98	6.14e-06	0.000596		CD209		Activated NTRK3 signals through PI3K (R-HSA-9603381)	2 (1.0%)	32.36	0.00154	0.029										CSF2RB		Diseases of signal transduction by growth factor receptors and second messengers (R-HSA-5663202)	8 (10.0%)
							CD68		Signaling by Interleukins (R-HSA-449147)	24 (24.7%)	11.09	9.77e-19	6.4e-16		CCL4		Trafficking and processing of endosomal TLR (R-HSA-1679131)	5 (1.8%)	28.27	5.3e-07	2.77e-05		CXCR3	Chemokine receptors bind chemokines (R-HSA-380108)	8 (8.3%)	30.09	2.28e-10	9.96e-08		CD226		Fibronectin matrix formation (R-HSA-1566977)	2 (1.0%)	32.36	0.00154	0.0288										CYBB		Signaling by Receptor Tyrosine Kinases (R-HSA-9006934)	9 (11.3%)
							CD79A		TCR signaling (R-HSA-202403)	6 (6.2%)	10.27	2.68e-05	0.00412		CCL5		MAPK1 (ERK2) activation (R-HSA-112411)	3 (1.1%)	27.56	0.000133	0.00341		CXCR4	Cell recruitment (pro-inflammatory response) (R-HSA-9664424)	3 (3.1%)	24.74	0.000237	0.0119		CD244		STAT5 Activation (R-HSA-9645135)	2 (1.0%)	32.36	0.00154	0.0286										EGR2		Signal Transduction (R-HSA-162582)	23 (28.8%)
							CD83		Signaling by NTRK1 (TRKA) (R-HSA-187037)	5 (5.2%)	9.47	0.000189	0.019		CCNB2		BH3-only proteins associate with and inactivate anti-apoptotic BCL-2 members (R-HSA-111453)	3 (1.1%)	27.56	0.000133	0.00337		DMBT1	Purinergic signaling in leishmaniasis infection (R-HSA-9660826)	3 (3.1%)	24.74	0.000237	0.0117		CD247		PTK6 promotes HIF1A stabilization (R-HSA-8857538)	2 (1.0%)	32.36	0.00154	0.0284										EGR3		Unclassified (UNCLASSIFIED)	14 (17.5%)
							CD86		Adaptive Immune System (R-HSA-1280218)	34 (35.1%)	8.69	2.96e-23	3.88e-20		CCR1		Interleukin-6 signaling (R-HSA-1059683)	4 (1.4%)	26.73	1.03e-05	0.000368		EBI3	Interleukin-2 family signaling (R-HSA-451927)	5 (5.2%)	24.36	1.87e-06	0.000223		CD274		Translocation of ZAP-70 to Immunological synapse (R-HSA-202430)	8 (3.8%)	31.06	1.03e-10	1.18e-08										EOMES
							CD8A		Cell surface interactions at the vascular wall (R-HSA-202733)	8 (8.2%)	8.62	4.27e-06	0.00086		CCR2		CHL1 interactions (R-HSA-447041)	3 (1.1%)	24.5	0.000197	0.00482		EGFR	Interleukin-3, Interleukin-5 and GM-CSF signaling (R-HSA-512988)	5 (5.2%)	22.81	2.61e-06	0.000285		CD28		Nuclear events stimulated by ALK signaling in cancer (R-HSA-9725371)	10 (4.8%)	30.34	5.76e-13	8.38e-11										FASLG
							CRTAM		Signaling by NTRKs (R-HSA-166520)	5 (5.2%)	8.1	0.00039	0.033		CCR4		Interleukin-1 processing (R-HSA-448706)	3 (1.1%)	24.5	0.000197	0.00478		EIF2AK2	Signaling by SCF-KIT (R-HSA-1433557)	4 (4.2%)	21.99	3.23e-05	0.00228		CD3		Trafficking and processing of endosomal TLR (R-HSA-1679131)	4 (1.9%)	29.87	7.28e-06	0.000284										GAGE1/12I/12F
							CSF2RB		Cytokine Signaling in Immune system (R-HSA-1280215)	28 (28.9%)	7.74	1.02e-17	5.37e-15		CCR5		OAS antiviral response (R-HSA-8983711)	3 (1.1%)	24.5	0.000197	0.00473		ENTPD1	Signaling by CSF1 (M-CSF) in myeloid cells (R-HSA-9680350)	3 (3.1%)	21.44	0.000364	0.0165		CD33		Signaling by PDGFRA extracellular domain mutants (R-HSA-9673770)	3 (1.4%)	29.12	0.000123	0.00338										GAGE12J
							CTLA4		Immune System (R-HSA-168256)	64 (66.0%)	6.48	3.75e-40	9.81e-37		CCR6		MAPK3 (ERK1) activation (R-HSA-110056)	3 (1.1%)	24.5	0.000197	0.00469		FCGR1A	Interleukin-4 and Interleukin-13 signaling (R-HSA-6785807)	11 (11.5%)	21.24	4.07e-12	2.13e-09		CD38		Signaling by PDGFRA transmembrane, juxtamembrane and kinase domain mutants (R-HSA-9673767)	3 (1.4%)	29.12	0.000123	0.00335										GAGE13
							CXCR2		Diseases of signal transduction by growth factor receptors and second messengers (R-HSA-5663202)	10 (10.3%)	4.78	4.66e-05	0.00642		CCR7		Activated NTRK3 signals through PI3K (R-HSA-9603381)	2 (0.7%)	24.5	0.00267	0.0421		FCGR3A	CD28 co-stimulation (R-HSA-389356)	3 (3.1%)	20.75	0.000402	0.0179		CD3E		Chemokine receptors bind chemokines (R-HSA-380108)	17 (8.2%)	28.95	8.41e-21	2.45e-18										GAGE2C/2A/2E
							EBI3		Neutrophil degranulation (R-HSA-6798695)	10 (10.3%)	4.44	8.6e-05	0.00979		CD163		Fibronectin matrix formation (R-HSA-1566977)	2 (0.7%)	24.5	0.00267	0.0419		FCGR3B	IRS-related events triggered by IGF1R (R-HSA-2428928)	4 (4.2%)	19.94	4.77e-05	0.0032		CD3G		Signaling by ALK (R-HSA-201556)	8 (3.8%)	27.74	2.89e-10	3.03e-08										GATA3
							EGR2		Innate Immune System (R-HSA-168249)	18 (18.6%)	3.43	3.99e-06	0.000872		CD1C		STAT5 Activation (R-HSA-9645135)	2 (0.7%)	24.5	0.00267	0.0416		FOXO1	IGF1R signaling cascade (R-HSA-2428924)	4 (4.2%)	19.94	4.77e-05	0.00312		CD40		Phosphorylation of CD3 and TCR zeta chains (R-HSA-202427)	8 (3.8%)	27.74	2.89e-10	2.91e-08										GPR18
							EGR3		Signal Transduction (R-HSA-162582)	31 (32.0%)	2.6	2.88e-07	8.37e-05		CD2		Synthesis of 15-eicosatetraenoic acid derivatives (R-HSA-2142770)	2 (0.7%)	24.5	0.00267	0.0414		FUT4	Interferon alpha/beta signaling (R-HSA-909733)	7 (7.3%)	19.75	6.47e-08	1.41e-05		CD40LG		Interleukin-15 signaling (R-HSA-8983432)	4 (1.9%)	27.74	1.01e-05	0.000384										GZMA
							EOMES		Disease (R-HSA-1643685)	20 (20.6%)	2.33	0.000402	0.0329		CD209		PTK6 promotes HIF1A stabilization (R-HSA-8857538)	2 (0.7%)	24.5	0.00267	0.0411		GPR18	Signaling by Type 1 Insulin-like Growth Factor 1 Receptor (IGF1R) (R-HSA-2404192)	4 (4.2%)	19.49	5.23e-05	0.00334		CD47		Interleukin-7 signaling (R-HSA-1266695)	7 (3.4%)	27.18	4.58e-09	3.87e-07										GZMH
							FASLG		Unclassified (UNCLASSIFIED)	13 (13.4%)	0.29	5.67e-12	2.12e-09		CD22		Phosphorylation of CD3 and TCR zeta chains (R-HSA-202427)	9 (3.3%)	23.62	7.74e-11	6.54e-09		GRAP2	GPVI-mediated activation cascade (R-HSA-114604)	3 (3.1%)	18.38	0.000578	0.0248		CD48		Interleukin-27 signaling (R-HSA-9020956)	3 (1.4%)	26.48	0.000167	0.00447										HLA-DQA2
							FCGR3B								CD226		Translocation of ZAP-70 to Immunological synapse (R-HSA-202430)	8 (2.9%)	23.52	9.4e-10	7.24e-08		HAVCR2	Costimulation by the CD28 family (R-HSA-388841)	6 (6.3%)	17.86	1.07e-06	0.00014		CD52		CD28 dependent Vav1 pathway (R-HSA-389359)	3 (1.4%)	26.48	0.000167	0.00443										HLA-DQB2
							FOXO1								CD244		Nuclear events stimulated by ALK signaling in cancer (R-HSA-9725371)	10 (3.6%)	22.97	9.17e-12	1e-09		HIF1A	FLT3 Signaling (R-HSA-9607240)	3 (3.1%)	17.86	0.000628	0.0261		CD6		Costimulation by the CD28 family (R-HSA-388841)	19 (9.1%)	25.62	5.65e-22	1.85e-19										ID2
							FUT4								CD247		Signaling by PDGFRA extracellular domain mutants (R-HSA-9673770)	3 (1.1%)	22.05	0.000279	0.0064		HLA-DQA1	PI3K Cascade (R-HSA-109704)	3 (3.1%)	17.86	0.000628	0.0257		CD63		Growth hormone receptor signaling (R-HSA-982772)	6 (2.9%)	25.32	9.71e-08	6.36e-06										IKZF3
							GATA3								CD274		Signaling by PDGFRA transmembrane, juxtamembrane and kinase domain mutants (R-HSA-9673767)	3 (1.1%)	22.05	0.000279	0.00634		HLA-DRA	Constitutive Signaling by Aberrant PI3K in Cancer (R-HSA-2219530)	5 (5.2%)	16.49	1.32e-05	0.00115		CD68		Signaling by cytosolic FGFR1 fusion mutants (R-HSA-1839117)	4 (1.9%)	24.27	1.81e-05	0.000676										IL10
							GPR18								CD28		CASP8 activity is inhibited (R-HSA-5218900)	3 (1.1%)	22.05	0.000279	0.00629		HLA-DRB1	IRS-mediated signalling (R-HSA-112399)	3 (3.1%)	16.49	0.000796	0.0298		CD69		Specification of primordial germ cells (R-HSA-9827857)	3 (1.4%)	24.27	0.000221	0.0058										IL10RA
							GRAP2								CD33		Dimerization of procaspase-8 (R-HSA-69416)	3 (1.1%)	22.05	0.000279	0.00624		HLA-F-AS1	PI3K/AKT Signaling in Cancer (R-HSA-2219528)	7 (7.3%)	16.31	2.44e-07	4.92e-05		CD74		Regulation of IFNG signaling (R-HSA-877312)	3 (1.4%)	24.27	0.000221	0.00574										IL21
							GZMA								CD37		Regulation by c-FLIP (R-HSA-3371378)	3 (1.1%)	22.05	0.000279	0.00618		ID2	Interferon gamma signaling (R-HSA-877300)	7 (7.3%)	15.63	3.27e-07	6.12e-05		CD8		IFNG signaling activates MAPKs (R-HSA-9732724)	2 (1.0%)	24.27	0.00284	0.0496										IL6
							GZMH								CD38		Interleukin-2 family signaling (R-HSA-451927)	13 (4.7%)	21.72	1.48e-14	2.15e-12		IFIT1	Interleukin-12 family signaling (R-HSA-447115)	4 (4.2%)	15.31	0.000136	0.0074		CD80		Signaling by phosphorylated juxtamembrane, extracellular and kinase domain KIT mutants (R-HSA-9670439)	4 (1.9%)	22.84	2.35e-05	0.000841										IL7R
							HAVCR2								CD3D		Signaling by ALK (R-HSA-201556)	8 (2.9%)	21	2.61e-09	1.85e-07		IFIT3	Insulin receptor signalling cascade (R-HSA-74751)	3 (3.1%)	14.29	0.00121	0.044		CD83		Signaling by KIT in disease (R-HSA-9669938)	4 (1.9%)	22.84	2.35e-05	0.00083										IRF4
							HLA-DQB2								CD3E		Interleukin-15 signaling (R-HSA-8983432)	4 (1.4%)	21	3.02e-05	0.000918		IFNG	Interleukin-12 signaling (R-HSA-9020591)	3 (3.1%)	13.98	0.00129	0.0463		CD86		Interleukin-2 family signaling (R-HSA-451927)	10 (4.8%)	22.06	1.99e-11	2.6e-09										ITGB1
							ID2								CD3G		Interleukin-7 signaling (R-HSA-1266695)	7 (2.5%)	20.58	3.12e-08	1.99e-06		IGF1R	Negative regulation of the PI3K/AKT network (R-HSA-199418)	6 (6.3%)	12.99	6.95e-06	0.00065		CD8A		Generation of second messenger molecules (R-HSA-202433)	9 (4.3%)	21.84	2.28e-10	2.49e-08										JAML
							IFNG								CD4		Interleukin-4 and Interleukin-13 signaling (R-HSA-6785807)	31 (11.2%)	20.53	2.96e-32	1.11e-29		IGSF6	Integrin cell surface interactions (R-HSA-216083)	5 (5.2%)	12.76	4.59e-05	0.00316		CDKN3		Interleukin-4 and Interleukin-13 signaling (R-HSA-6785807)	24 (11.5%)	20.99	3.34e-25	1.25e-22										JCHAIN
							IGSF6								CD40LG		Costimulation by the CD28 family (R-HSA-388841)	20 (7.2%)	20.42	3.95e-21	1.04e-18		IKZF2	PI5P, PP2A and IER3 Regulate PI3K/AKT Signaling (R-HSA-6811558)	5 (5.2%)	11.65	7.1e-05	0.00413		CEACAM1		TNFs bind their physiological receptors (R-HSA-5669034)	6 (2.9%)	20.8	3.47e-07	2.07e-05										KLF2
							IKZF1								CD44		Generation of second messenger molecules (R-HSA-202433)	11 (4.0%)	20.21	3.96e-12	4.71e-10		IKZF4	Cell surface interactions at the vascular wall (R-HSA-202733)	10 (10.4%)	10.88	2.84e-08	7.43e-06		CIITA		Signal transduction by L1 (R-HSA-445144)	4 (1.9%)	19.42	4.66e-05	0.00153										KLRB1
							IKZF3								CD47		PECAM1 interactions (R-HSA-210990)	3 (1.1%)	20.05	0.000379	0.00801		IL12A	Signaling by Interleukins (R-HSA-449147)	21 (21.9%)	9.81	2.2e-15	1.92e-12		CRTAM		CTLA4 inhibitory signaling (R-HSA-389513)	4 (1.9%)	19.42	4.66e-05	0.00151										KLRD1
							IKZF4								CD48		Interleukin-27 signaling (R-HSA-9020956)	3 (1.1%)	20.05	0.000379	0.00794		IL12B	Immunoregulatory interactions between a Lymphoid and a non-Lymphoid cell (R-HSA-198933)	9 (9.4%)	9.79	3.55e-07	6.21e-05		CSF2RB		Signaling by FLT3 ITD and TKD mutants (R-HSA-9703648)	3 (1.4%)	19.42	0.000448	0.0106										KLRG1
							IL10								CD52		FOXO-mediated transcription of cell death genes (R-HSA-9614657)	4 (1.4%)	19.6	4.07e-05	0.00121		IL17A	Respiratory Syncytial Virus Infection Pathway (R-HSA-9820952)	5 (5.2%)	9.08	0.00023	0.012		CTLA4		FOXO-mediated transcription of cell death genes (R-HSA-9614657)	3 (1.4%)	19.42	0.000448	0.0105										KLRK1
							IL21								CD53		Growth hormone receptor signaling (R-HSA-982772)	6 (2.2%)	19.17	5e-07	2.67e-05		IL18	Cytokine Signaling in Immune system (R-HSA-1280215)	32 (33.3%)	8.93	3.29e-22	4.31e-19		CTSS		Cell recruitment (pro-inflammatory response) (R-HSA-9664424)	5 (2.4%)	18.67	6.1e-06	0.000258										KREMEN1
							IL2RG								CD6		TNFs bind their physiological receptors (R-HSA-5669034)	7 (2.5%)	18.38	7.42e-08	4.42e-06		IL1A	SARS-CoV-2 activates/modulates innate and adaptive immune responses (R-HSA-9705671)	5 (5.2%)	8.86	0.000258	0.0125		CX3CL1		Interleukin receptor SHC signaling (R-HSA-912526)	5 (2.4%)	18.67	6.1e-06	0.000254										LAG3
							IL6								CD63		Signal transduction by L1 (R-HSA-445144)	5 (1.8%)	18.38	5.9e-06	0.000231		IL2	Peptide ligand-binding receptors (R-HSA-375276)	8 (8.3%)	8.75	3.8e-06	0.000398		CXCL10		Purinergic signaling in leishmaniasis infection (R-HSA-9660826)	5 (2.4%)	18.67	6.1e-06	0.00025										LILRB2
							IL7R								CD68		Signaling by cytosolic FGFR1 fusion mutants (R-HSA-1839117)	4 (1.4%)	18.38	5.37e-05	0.00154		IL2RG	Interferon Signaling (R-HSA-913531)	10 (10.4%)	8.03	4.83e-07	7.45e-05		CXCL9		Downstream signal transduction (R-HSA-186763)	5 (2.4%)	18.67	6.1e-06	0.000246										LY9
							IRS1								CD69		Specification of primordial germ cells (R-HSA-9827857)	3 (1.1%)	18.38	0.0005	0.0102		IRF9	Cell-Cell communication (R-HSA-1500931)	5 (5.2%)	7.15	0.00069	0.0274		CXCR3		Platelet Adhesion to exposed collagen (R-HSA-75892)	3 (1.4%)	18.2	0.000547	0.0126										LYZ
							ITGAX								CD70		Interleukin-2 signaling (R-HSA-9020558)	3 (1.1%)	18.38	0.0005	0.0101		IRS1	PIP3 activates AKT signaling (R-HSA-1257604)	8 (8.3%)	6.81	2.37e-05	0.00183		CXCR4		GAB1 signalosome (R-HSA-180292)	3 (1.4%)	18.2	0.000547	0.0124										MRC1
							ITGB1								CD74		Endosomal/Vacuolar pathway (R-HSA-1236977)	3 (1.1%)	18.38	0.0005	0.01		ITGAE	Intracellular signaling by second messengers (R-HSA-9006925)	8 (8.3%)	5.87	6.72e-05	0.004		CXCR5		Pyroptosis (R-HSA-5620971)	5 (2.4%)	17.98	7.43e-06	0.000286										NCF1
							ITGB7								CD79B		Regulation of IFNG signaling (R-HSA-877312)	3 (1.1%)	18.38	0.0005	0.00993		ITGB7	Class A/1 (Rhodopsin-like receptors) (R-HSA-373076)	9 (9.4%)	5.83	2.45e-05	0.00184		CXCR6		Interferon alpha/beta signaling (R-HSA-909733)	14 (6.7%)	17.88	3.85e-14	7.21e-12										NCR1
							ITK								CD83		Signaling by phosphorylated juxtamembrane, extracellular and kinase domain KIT mutants (R-HSA-9670439)	4 (1.4%)	17.29	6.94e-05	0.00195		KIR2DL3	Immune System (R-HSA-168256)	56 (58.3%)	5.73	3.81e-31	9.99e-28		DDX58		CD28 dependent PI3K/Akt signaling (R-HSA-389357)	4 (1.9%)	17.65	6.92e-05	0.00213										NKG7
							JAML								CD86		Platelet sensitization by LDL (R-HSA-432142)	4 (1.4%)	17.29	6.94e-05	0.00193		KLRB1	G alpha (i) signalling events (R-HSA-418594)	8 (8.3%)	5.46	0.000111	0.00633		DGAT2		Signaling by SCF-KIT (R-HSA-1433557)	7 (3.4%)	17.42	1.3e-07	8.28e-06										POLR2A
							JCHAIN								CD8A		Signaling by KIT in disease (R-HSA-9669938)	4 (1.4%)	17.29	6.94e-05	0.00191		KLRF1	Neutrophil degranulation (R-HSA-6798695)	12 (12.5%)	5.38	2.29e-06	0.000261		EBI3		Platelet sensitization by LDL (R-HSA-432142)	3 (1.4%)	17.13	0.000659	0.0145										POU2AF1
							KIR2DL3								CDK1		Interleukin receptor SHC signaling (R-HSA-912526)	6 (2.2%)	16.96	1.1e-06	5.44e-05		KREMEN1	Signaling by Receptor Tyrosine Kinases (R-HSA-9006934)	12 (12.5%)	4.99	5.02e-06	0.000506		EGFR		Interferon gamma signaling (R-HSA-877300)	16 (7.7%)	16.18	2.91e-15	5.87e-13										PRDM1
							KLF2								CDKN3		Golgi Cisternae Pericentriolar Stack Reorganization (R-HSA-162658)	3 (1.1%)	16.96	0.000644	0.0126		LAMP1	MAPK family signaling cascades (R-HSA-5683057)	7 (7.3%)	4.87	0.000601	0.0254		EGR2		Interleukin-6 family signaling (R-HSA-6783589)	4 (1.9%)	16.18	9.89e-05	0.00288										PRF1
							KLRB1								CEACAM1		Early Phase of HIV Life Cycle (R-HSA-162594)	3 (1.1%)	15.75	0.000812	0.0153		LAPTM5	Adaptive Immune System (R-HSA-1280218)	18 (18.8%)	4.65	4.7e-08	1.12e-05		EGR3		Signaling by PDGFR in disease (R-HSA-9671555)	3 (1.4%)	16.18	0.000785	0.0168										PTGS2
							KLRD1								CIITA		Other semaphorin interactions (R-HSA-416700)	4 (1.4%)	15.47	0.000111	0.0029		LCN2	Diseases of signal transduction by growth factor receptors and second messengers (R-HSA-5663202)	9 (9.4%)	4.35	0.000231	0.0118		EIF2AK2		Interleukin-20 family signaling (R-HSA-8854691)	4 (1.9%)	15.53	0.000117	0.00329										PTPRC
							KLRG1								CLEC4C		Interferon gamma signaling (R-HSA-877300)	20 (7.2%)	15.31	2.05e-18	4.12e-16		LST1	Innate Immune System (R-HSA-168249)	22 (22.9%)	4.23	6.37e-09	1.85e-06		ENTPD1		DAP12 signaling (R-HSA-2424491)	4 (1.9%)	15.53	0.000117	0.00326										S100A8
							KLRK1								CRTAM		Signaling by SCF-KIT (R-HSA-1433557)	8 (2.9%)	15.08	4.54e-08	2.83e-06		M6PR	GPCR ligand binding (R-HSA-500792)	9 (9.4%)	4.16	0.000319	0.0152		EOMES		Other semaphorin interactions (R-HSA-416700)	3 (1.4%)	15.33	0.000925	0.0194										SH2D1B
							LILRB2								CSF1R		Signaling by CSF1 (M-CSF) in myeloid cells (R-HSA-9680350)	6 (2.2%)	14.7	2.71e-06	0.000125		MAD2L1	Infectious disease (R-HSA-5663205)	18 (18.8%)	3.72	1.24e-06	0.000155		FAS		Signaling by ALK fusions and activated point mutants (R-HSA-9725370)	14 (6.7%)	15.27	3.81e-13	6.23e-11										SLAMF7
							LY9								CSF2RB		Interleukin-20 family signaling (R-HSA-8854691)	5 (1.8%)	14.7	1.91e-05	0.00065		NFATC1	GPCR downstream signalling (R-HSA-388396)	10 (10.4%)	3.42	0.000688	0.0277		FASLG		Signaling by ALK in cancer (R-HSA-9700206)	14 (6.7%)	15.27	3.81e-13	5.86e-11										SNAI1
							LYZ								CTLA4		DAP12 signaling (R-HSA-2424491)	5 (1.8%)	14.7	1.91e-05	0.000642		NRP1	Signaling by GPCR (R-HSA-372790)	11 (11.5%)	3.37	0.000416	0.0182		FCER1G		FGFR1 mutant receptor activation (R-HSA-1839124)	4 (1.9%)	14.93	0.000137	0.0037										SRGN
							MRC1								CTSS		Signaling by FLT3 ITD and TKD mutants (R-HSA-9703648)	3 (1.1%)	14.7	0.001	0.0183		OAS1	Viral Infection Pathways (R-HSA-9824446)	13 (13.5%)	3.29	0.000152	0.00813		FCGR1A		Interleukin-3, Interleukin-5 and GM-CSF signaling (R-HSA-512988)	7 (3.4%)	14.46	4.94e-07	2.75e-05										STAT4
							NCR1								CX3CL1		Caspase activation via Death Receptors in the presence of ligand (R-HSA-140534)	3 (1.1%)	14.7	0.001	0.0181		PECAM1	Hemostasis (R-HSA-109582)	10 (10.4%)	3.19	0.00115	0.0424		FCGR3B		Interleukin-37 signaling (R-HSA-9008059)	3 (1.4%)	13.87	0.00125	0.0241										TBX21
							NCR3								CX3CR1		Interferon alpha/beta signaling (R-HSA-909733)	15 (5.4%)	14.51	9.41e-14	1.3e-11		PIK3CA	Disease (R-HSA-1643685)	25 (26.0%)	2.94	6.26e-07	9.1e-05		FCRLA		RAF-independent MAPK1/3 activation (R-HSA-112409)	3 (1.4%)	13.24	0.00144	0.0273										TGFB1
							NFATC1								CXCL1		Cell recruitment (pro-inflammatory response) (R-HSA-9664424)	5 (1.8%)	14.13	2.34e-05	0.000757		PMEL	Signal Transduction (R-HSA-162582)	30 (31.3%)	2.54	7.63e-07	0.000105		FOXO1		Signaling by CSF3 (G-CSF) (R-HSA-9674555)	4 (1.9%)	12.94	0.000243	0.00618										TLR8
							PRDM1								CXCL10		Purinergic signaling in leishmaniasis infection (R-HSA-9660826)	5 (1.8%)	14.13	2.34e-05	0.000748		PRDM1	Unclassified (UNCLASSIFIED)	11 (11.5%)	0.25	2.73e-13	1.78e-10		FUT4		Signaling by CSF1 (M-CSF) in myeloid cells (R-HSA-9680350)	4 (1.9%)	12.94	0.000243	0.00612										TNFRSF17
							PRF1								CXCL11		Downstream signal transduction (R-HSA-186763)	5 (1.8%)	14.13	2.34e-05	0.000739		PTEN							FYB		CD28 co-stimulation (R-HSA-389356)	4 (1.9%)	12.53	0.000277	0.00684										TNFSF9
							PTEN								CXCL13		Platelet Adhesion to exposed collagen (R-HSA-75892)	3 (1.1%)	13.78	0.00122	0.0214		PTGS2							GAGE10		Immunoregulatory interactions between a Lymphoid and a non-Lymphoid cell (R-HSA-198933)	25 (12.0%)	12.32	3.24e-20	8.5e-18										XAGE1B
							PTGS2								CXCL9		GAB1 signalosome (R-HSA-180292)	3 (1.1%)	13.78	0.00122	0.0212		PTPN11							GBP1		Interleukin-12 family signaling (R-HSA-447115)	7 (3.4%)	12.13	1.69e-06	8.33e-05										ZAP70
							PTPRC								CXCR2		Pyroptosis (R-HSA-5620971)	5 (1.8%)	13.61	2.84e-05	0.000875		PTPN6							GPR18		Signaling by FGFR1 in disease (R-HSA-5655302)	4 (1.9%)	12.13	0.000314	0.00761
							RB1								CXCR3		RAF-independent MAPK1/3 activation (R-HSA-112409)	4 (1.4%)	13.36	0.000202	0.00477		PYGL							GUSB		Constitutive Signaling by Aberrant PI3K in Cancer (R-HSA-2219530)	8 (3.8%)	11.95	3.39e-07	2.06e-05
							S100A8								CXCR4		Immunoregulatory interactions between a Lymphoid and a non-Lymphoid cell (R-HSA-198933)	35 (12.7%)	13.06	6.35e-29	1.85e-26		RORC							GZMA		Regulated Necrosis (R-HSA-5218859)	7 (3.4%)	11.72	2.15e-06	0.000104
							S100A9								CXCR5		Interleukin-3, Interleukin-5 and GM-CSF signaling (R-HSA-512988)	8 (2.9%)	12.51	2.11e-07	1.18e-05		SDHA							GZMB		Inactivation of CSF3 (G-CSF) signaling (R-HSA-9705462)	3 (1.4%)	11.65	0.0021	0.0374
							SH2D1A								CXCR6		Interleukin-6 family signaling (R-HSA-6783589)	4 (1.4%)	12.25	0.000288	0.00622		SH2D1A							GZMH		GPVI-mediated activation cascade (R-HSA-114604)	4 (1.9%)	11.09	0.000446	0.0106
							SH2D1B								CYBB		Signaling by PDGFR in disease (R-HSA-9671555)	3 (1.1%)	12.25	0.00175	0.0297		SKAP2							GZMK		FLT3 signaling in disease (R-HSA-9682385)	3 (1.4%)	10.79	0.00263	0.0465
							SKAP2								DDX58		Interleukin-12 family signaling (R-HSA-447115)	9 (3.3%)	11.81	6.08e-08	3.71e-06		SNAI2							HAVCR2		PI3K/AKT Signaling in Cancer (R-HSA-2219528)	10 (4.8%)	10.55	3.76e-08	2.74e-06
							SLAMF7								DGAT2		Signaling by ALK fusions and activated point mutants (R-HSA-9725370)	14 (5.1%)	11.56	1.65e-11	1.6e-09		TAGAP							HERC6		Downstream TCR signaling (R-HSA-202424)	11 (5.3%)	10.47	8.39e-09	6.66e-07
							SNAI1								EBI3		Signaling by ALK in cancer (R-HSA-9700206)	14 (5.1%)	11.56	1.65e-11	1.54e-09		TARP							HGF		Signaling by Interleukins (R-HSA-449147)	48 (23.1%)	10.15	1.94e-34	1.7e-31
							SRGN								EGFR		FGFR1 mutant receptor activation (R-HSA-1839124)	4 (1.4%)	11.31	0.000396	0.00817		TLR3							HIF1A		NGF-stimulated transcription (R-HSA-9031628)	4 (1.9%)	9.96	0.000679	0.0148
							STAT4								EGR2		CTLA4 inhibitory signaling (R-HSA-389513)	3 (1.1%)	11.03	0.00239	0.0382		TLR7							HLA-DMA		Interferon Signaling (R-HSA-913531)	27 (13.0%)	9.82	3.8e-19	9.05e-17
							TAGAP								EGR3		DAP12 interactions (R-HSA-2172127)	6 (2.2%)	10.76	1.81e-05	0.000624		TLR8							HLA-DMB		Negative regulation of the PI3K/AKT network (R-HSA-199418)	10 (4.8%)	9.81	7.63e-08	5.26e-06
							TBX21								EIF2AK2		Interleukin-37 signaling (R-HSA-9008059)	3 (1.1%)	10.5	0.00276	0.0421		TNFAIP8							HLA-DOB		Nuclear Events (kinase and transcription factor activation) (R-HSA-198725)	6 (2.9%)	9.55	3.86e-05	0.00128
							TGFB1								ENTPD1		FLT3 Signaling (R-HSA-9607240)	5 (1.8%)	10.21	0.00012	0.00311		TNFSF13B							HLA-DPB1		PI5P, PP2A and IER3 Regulate PI3K/AKT Signaling (R-HSA-6811558)	9 (4.3%)	9.5	4.57e-07	2.6e-05
							TLR8								EOMES		Regulated Necrosis (R-HSA-5218859)	8 (2.9%)	10.14	1.13e-06	5.48e-05		TNFSF4							HLA-DQA1		Cytokine Signaling in Immune system (R-HSA-1280215)	75 (36.1%)	9.48	7.69e-53	1.01e-49
							TNFRSF17								FAS		Signaling by Interleukins (R-HSA-449147)	63 (22.8%)	10.09	6.67e-45	5.82e-42		VTCN1							HLA-DQA2		DAP12 interactions (R-HSA-2172127)	4 (1.9%)	9.47	0.000822	0.0175
							ZAP70								FASLG		CD28 dependent PI3K/Akt signaling (R-HSA-389357)	3 (1.1%)	10.02	0.00317	0.0469									HLA-DQB2		SARS-CoV-1 activates/modulates innate immune responses (R-HSA-9692916)	4 (1.9%)	9.47	0.000822	0.0174
															FCER1G		Signaling by CSF3 (G-CSF) (R-HSA-9674555)	4 (1.4%)	9.8	0.000695	0.0135									HLA-DRA		TCR signaling (R-HSA-202403)	12 (5.8%)	9.39	6.06e-09	4.96e-07
															FCGR1A		Peptide ligand-binding receptors (R-HSA-375276)	26 (9.4%)	9.75	2.07e-18	3.88e-16									ICOS		IRS-related events triggered by IGF1R (R-HSA-2428928)	4 (1.9%)	9.03	0.000986	0.0202
															FCGR2B		Integrin cell surface interactions (R-HSA-216083)	11 (4.0%)	9.62	1.87e-08	1.23e-06									ID2		IGF1R signaling cascade (R-HSA-2428924)	4 (1.9%)	9.03	0.000986	0.02
															FCGR3A		TCR signaling (R-HSA-202403)	16 (5.8%)	9.48	1.31e-11	1.32e-09									ID3		Signaling by PDGF (R-HSA-186797)	5 (2.4%)	8.99	0.000232	0.00596
															FCGR3B		CD28 co-stimulation (R-HSA-389356)	4 (1.4%)	9.48	0.00079	0.0151									IDO1		TNFR2 non-canonical NF-kB pathway (R-HSA-5668541)	9 (4.3%)	8.92	7.85e-07	4.28e-05
															FCRLA		Cytokine Signaling in Immune system (R-HSA-1280215)	96 (34.8%)	9.19	3.46e-66	4.53e-63									IFI27		Signaling by Type 1 Insulin-like Growth Factor 1 Receptor (IGF1R) (R-HSA-2404192)	4 (1.9%)	8.83	0.00108	0.0212
															FOXO1		Signaling by FGFR1 in disease (R-HSA-5655302)	4 (1.4%)	9.19	0.000893	0.0166									IFI44L		Insulin receptor signalling cascade (R-HSA-74751)	4 (1.9%)	8.63	0.00117	0.0227
															FOXP3		Downstream TCR signaling (R-HSA-202424)	12 (4.3%)	8.65	1.45e-08	9.97e-07									IFIH1		MHC class II antigen presentation (R-HSA-2132295)	11 (5.3%)	8.47	7.72e-08	5.18e-06
															FUT4		IRS-related events triggered by IGF1R (R-HSA-2428928)	5 (1.8%)	8.55	0.000284	0.00624									IFIT1		Interleukin-12 signaling (R-HSA-9020591)	4 (1.9%)	8.44	0.00127	0.0243
															FYB		IGF1R signaling cascade (R-HSA-2428924)	5 (1.8%)	8.55	0.000284	0.00619									IFIT3		Peptide ligand-binding receptors (R-HSA-375276)	17 (8.2%)	8.42	2.2e-11	2.74e-09
															GAGE10		Interferon Signaling (R-HSA-913531)	31 (11.2%)	8.53	5.14e-20	1.22e-17									IFITM1		Integrin cell surface interactions (R-HSA-216083)	7 (3.4%)	8.09	2.58e-05	0.000901
															GBP1		Intrinsic Pathway for Apoptosis (R-HSA-109606)	6 (2.2%)	8.48	7.24e-05	0.00197									IFITM2		Extra-nuclear estrogen signaling (R-HSA-9009391)	6 (2.9%)	7.98	0.000107	0.00307
															GNLY		GPVI-mediated activation cascade (R-HSA-114604)	4 (1.4%)	8.4	0.00126	0.0217									IFNG		Signaling by NTRK1 (TRKA) (R-HSA-187037)	9 (4.3%)	7.8	2.42e-06	0.000111
															GPR18		Signaling by Type 1 Insulin-like Growth Factor 1 Receptor (IGF1R) (R-HSA-2404192)	5 (1.8%)	8.35	0.000316	0.00679									IGF1R		Signaling by NTRKs (R-HSA-166520)	10 (4.8%)	7.41	1.06e-06	5.68e-05
															GRAP2		Insulin receptor signalling cascade (R-HSA-74751)	5 (1.8%)	8.17	0.000352	0.0075									IGSF6		Cell surface interactions at the vascular wall (R-HSA-202733)	14 (6.7%)	6.9	1.78e-08	1.33e-06
															GUSB		PI3K Cascade (R-HSA-109704)	4 (1.4%)	8.17	0.0014	0.024									IKZF2		Signaling by FGFR in disease (R-HSA-1226099)	4 (1.9%)	6.81	0.00282	0.0496
															GZMA		Interleukin-12 signaling (R-HSA-9020591)	5 (1.8%)	7.99	0.000391	0.00812									IKZF3		Respiratory Syncytial Virus Infection Pathway (R-HSA-9820952)	8 (3.8%)	6.58	3.08e-05	0.00103
															GZMB		Constitutive Signaling by Aberrant PI3K in Cancer (R-HSA-2219530)	7 (2.5%)	7.92	2.84e-05	0.000886									IKZF4		Adaptive Immune System (R-HSA-1280218)	56 (26.9%)	6.55	3.23e-30	2.11e-27
															GZMH		Ovarian tumor domain proteases (R-HSA-5689896)	4 (1.4%)	7.54	0.0019	0.031									IL10		Signaling by MET (R-HSA-6806834)	5 (2.4%)	6.39	0.00113	0.0221
															GZMK		IRS-mediated signalling (R-HSA-112399)	4 (1.4%)	7.54	0.0019	0.0309									IL10RA		RSV-host interactions (R-HSA-9833110)	6 (2.9%)	6.07	0.000478	0.0111
															HAVCR2		NGF-stimulated transcription (R-HSA-9031628)	4 (1.4%)	7.54	0.0019	0.0307									IL12A		Immune System (R-HSA-168256)	129 (62.0%)	5.98	1.45e-73	3.8e-70
															HERC6		Nuclear Events (kinase and transcription factor activation) (R-HSA-198725)	6 (2.2%)	7.23	0.000178	0.00445									IL12B		Cell-Cell communication (R-HSA-1500931)	9 (4.3%)	5.82	2.61e-05	0.000899
															HGF		PI3K/AKT Signaling in Cancer (R-HSA-2219528)	9 (3.3%)	7.19	4.55e-06	0.000189									IL15		SARS-CoV-2 activates/modulates innate and adaptive immune responses (R-HSA-9705671)	7 (3.4%)	5.62	0.000261	0.00651
															HIF1A		SARS-CoV-1 activates/modulates innate immune responses (R-HSA-9692916)	4 (1.4%)	7.17	0.00229	0.0367									IL18		Cargo recognition for clathrin-mediated endocytosis (R-HSA-8856825)	6 (2.9%)	5.6	0.00073	0.0158
															HLA-C		Cell surface interactions at the vascular wall (R-HSA-202733)	19 (6.9%)	7.09	2.85e-11	2.57e-09									IL1A		PIP3 activates AKT signaling (R-HSA-1257604)	14 (6.7%)	5.39	3.79e-07	2.2e-05
															HLA-DMA		Extra-nuclear estrogen signaling (R-HSA-9009391)	7 (2.5%)	7.05	6.06e-05	0.00173									IL1B		Class A/1 (Rhodopsin-like receptors) (R-HSA-373076)	18 (8.7%)	5.28	1.08e-08	8.35e-07
															HLA-DMB		Signaling by PDGF (R-HSA-186797)	5 (1.8%)	6.81	0.000825	0.0154									IL2RG		Diseases of signal transduction by growth factor receptors and second messengers (R-HSA-5663202)	24 (11.5%)	5.25	3.79e-11	4.51e-09
															HLA-DOA		TNFR2 non-canonical NF-kB pathway (R-HSA-5668541)	9 (3.3%)	6.75	7.68e-06	0.000287									IL3RA		G alpha (i) signalling events (R-HSA-418594)	16 (7.7%)	4.95	1.78e-07	1.11e-05
															HLA-DOB		Negative regulation of the PI3K/AKT network (R-HSA-199418)	9 (3.3%)	6.68	8.35e-06	0.000308									IL6		Leishmania infection (R-HSA-9658195)	11 (5.3%)	4.79	2.11e-05	0.000777
															HLA-DPB1		Signaling by NTRK1 (TRKA) (R-HSA-187037)	10 (3.6%)	6.56	3.09e-06	0.00014									IL7		Parasitic Infection Pathways (R-HSA-9824443)	11 (5.3%)	4.79	2.11e-05	0.000766
															HLA-DQA1		Adaptive Immune System (R-HSA-1280218)	73 (26.4%)	6.46	1.03e-38	6.71e-36									IL7R		Programmed Cell Death (R-HSA-5357801)	10 (4.8%)	4.74	5.5e-05	0.00176
															HLA-DQA2		MHC class II antigen presentation (R-HSA-2132295)	11 (4.0%)	6.42	1.24e-06	5.89e-05									IRF1		Intracellular signaling by second messengers (R-HSA-9006925)	14 (6.7%)	4.65	2.19e-06	0.000104
															HLA-DRA		PI5P, PP2A and IER3 Regulate PI3K/AKT Signaling (R-HSA-6811558)	8 (2.9%)	6.39	3.68e-05	0.00111									IRF9		Interleukin-1 family signaling (R-HSA-446652)	7 (3.4%)	4.53	0.000946	0.0197
															HLA-F		Respiratory Syncytial Virus Infection Pathway (R-HSA-9820952)	10 (3.6%)	6.23	4.96e-06	0.000203									IRS1		Signaling by Receptor Tyrosine Kinases (R-HSA-9006934)	23 (11.1%)	4.33	4.15e-09	3.62e-07
															HLA-F-AS1		Class A/1 (Rhodopsin-like receptors) (R-HSA-373076)	28 (10.1%)	6.22	1.35e-14	2.09e-12									ITGA1		Toll-like Receptor Cascades (R-HSA-168898)	7 (3.4%)	4.12	0.00164	0.0299
															ICAM1		Signaling by NTRKs (R-HSA-166520)	11 (4.0%)	6.17	1.82e-06	8.51e-05									ITGAE		MAPK1/MAPK3 signaling (R-HSA-5684996)	11 (5.3%)	3.97	0.000115	0.00327
															ICOS		RSV-host interactions (R-HSA-9833110)	8 (2.9%)	6.13	5.01e-05	0.00146									ITGAL		SARS-CoV-2-host interactions (R-HSA-9705683)	8 (3.8%)	3.92	0.00106	0.0211
															ID2		SARS-CoV-2 activates/modulates innate and adaptive immune responses (R-HSA-9705671)	10 (3.6%)	6.07	6.21e-06	0.000239									ITGB1		MAPK family signaling cascades (R-HSA-5683057)	12 (5.8%)	3.78	8.92e-05	0.00262
															ID3		Immune System (R-HSA-168256)	17 (62.3%)	6.04	4.17e-99	1.09e-95									ITGB7		GPCR ligand binding (R-HSA-500792)	18 (8.7%)	3.77	1.63e-06	8.23e-05
															IDO1		Semaphorin interactions (R-HSA-373755)	5 (1.8%)	5.74	0.00178	0.0301									JAML		Neutrophil degranulation (R-HSA-6798695)	18 (8.7%)	3.66	2.48e-06	0.000112
															IFI44L		Cargo recognition for clathrin-mediated endocytosis (R-HSA-8856825)	8 (2.9%)	5.65	8.86e-05	0.00239									JCHAIN		Extracellular matrix organization (R-HSA-1474244)	11 (5.3%)	3.58	0.000279	0.00683
															IFIH1		Antigen processing-Cross presentation (R-HSA-1236975)	8 (2.9%)	5.55	0.000101	0.00268									KLRB1		Platelet activation, signaling and aggregation (R-HSA-76002)	9 (4.3%)	3.36	0.00155	0.0284
															IFIT1		G alpha (i) signalling events (R-HSA-418594)	23 (8.3%)	5.38	6.41e-11	5.6e-09									KLRD1		RAF/MAP kinase cascade (R-HSA-5673001)	9 (4.3%)	3.31	0.00172	0.0311
															IFIT2		Signaling by Insulin receptor (R-HSA-74752)	5 (1.8%)	5.03	0.00318	0.0468									KLRF1		Infectious disease (R-HSA-5663205)	34 (16.3%)	3.18	2.04e-09	1.97e-07
															IFIT3		Neutrophil degranulation (R-HSA-6798695)	32 (11.6%)	4.92	1.13e-13	1.48e-11									KLRK1		Innate Immune System (R-HSA-168249)	35 (16.8%)	3.05	3.45e-09	3.11e-07
															IFITM1		Programmed Cell Death (R-HSA-5357801)	13 (4.7%)	4.66	4.99e-06	0.000201									KREMEN1		Signaling by GPCR (R-HSA-372790)	22 (10.6%)	3.05	3.61e-06	0.000157
															IFITM2		GPCR ligand binding (R-HSA-500792)	29 (10.5%)	4.59	9.31e-12	9.75e-10									LAG3		Hemostasis (R-HSA-109582)	21 (10.1%)	3.04	6.48e-06	0.000257
															IFNG		Cell-Cell communication (R-HSA-1500931)	9 (3.3%)	4.41	0.000219	0.00512									LAMP1		GPCR downstream signalling (R-HSA-388396)	19 (9.1%)	2.94	2.83e-05	0.000963
															IGF1R		Leishmania infection (R-HSA-9658195)	13 (4.7%)	4.28	1.24e-05	0.000438									LAMP3		Disease (R-HSA-1643685)	53 (25.5%)	2.82	2.35e-12	3.24e-10
															IGSF6		Parasitic Infection Pathways (R-HSA-9824443)	13 (4.7%)	4.28	1.24e-05	0.000432									LAPTM5		Signal Transduction (R-HSA-162582)	67 (32.2%)	2.57	8.61e-14	1.5e-11
															IKZF1		Toll Like Receptor 7/8 (TLR7/8) Cascade (R-HSA-168181)	6 (2.2%)	4.28	0.00286	0.043									LRP1		Nervous system development (R-HSA-9675108)	15 (7.2%)	2.53	0.000953	0.0197
															IKZF2		Apoptosis (R-HSA-109581)	10 (3.6%)	4.25	0.000134	0.00338									LST1		Viral Infection Pathways (R-HSA-9824446)	22 (10.6%)	2.52	6.71e-05	0.00209
															IKZF3		Extracellular matrix organization (R-HSA-1474244)	17 (6.2%)	4.19	7.69e-07	3.87e-05									LY9		Axon guidance (R-HSA-422475)	14 (6.7%)	2.47	0.00176	0.0316
															IKZF4		Diseases of signal transduction by growth factor receptors and second messengers (R-HSA-5663202)	25 (9.1%)	4.14	2.34e-09	1.7e-07									M6PR		Unclassified (UNCLASSIFIED)	27 (13.0%)	0.27	9.54e-26	4.17e-23
															IL10		SARS-CoV-2-host interactions (R-HSA-9705683)	11 (4.0%)	4.08	8.91e-05	0.00238									MAD2L1
															IL10RA		Clathrin-mediated endocytosis (R-HSA-8856828)	8 (2.9%)	4.08	0.000812	0.0154									MAPK1
															IL12A		Toll-like Receptor Cascades (R-HSA-168898)	9 (3.3%)	4.01	0.000443	0.00907									MAPK14
															IL12B		Antiviral mechanism by IFN-stimulated genes (R-HSA-1169410)	8 (2.9%)	4	0.000928	0.017									MELK
															IL15		Signaling by Receptor Tyrosine Kinases (R-HSA-9006934)	28 (10.1%)	3.99	5.6e-10	4.45e-08									MMP2
															IL17F		Interleukin-1 family signaling (R-HSA-446652)	8 (2.9%)	3.92	0.00106	0.0188									MMP9
															IL18		Innate Immune System (R-HSA-168249)	58 (21.0%)	3.83	5.02e-19	1.1e-16									MRC1
															IL1A		MAPK1/MAPK3 signaling (R-HSA-5684996)	14 (5.1%)	3.83	2.07e-05	0.000685									MS4A1
															IL1B		PIP3 activates AKT signaling (R-HSA-1257604)	13 (4.7%)	3.79	4.46e-05	0.00131									NFATC1
															IL2		C-type lectin receptors (CLRs) (R-HSA-5621481)	7 (2.5%)	3.73	0.00286	0.0432									NKG7
															IL21		Leishmania parasite growth and survival (R-HSA-9664433)	7 (2.5%)	3.7	0.00297	0.0445									NRP1
															IL23A		Anti-inflammatory response favouring Leishmania parasite infection (R-HSA-9662851)	7 (2.5%)	3.7	0.00297	0.0442									NT5E
															IL2RG		MAPK family signaling cascades (R-HSA-5683057)	15 (5.4%)	3.58	2.29e-05	0.000749									OAS1
															IL3RA		Signaling by GPCR (R-HSA-372790)	33 (12.0%)	3.46	5.59e-10	4.58e-08									PDCD1LG2
															IL6		Intracellular signaling by second messengers (R-HSA-9006925)	13 (4.7%)	3.27	0.000196	0.00483									PIK3CA
															IL7		Infectious disease (R-HSA-5663205)	45 (16.3%)	3.19	4.71e-12	5.37e-10									PRDM1
															IL7R		GPCR downstream signalling (R-HSA-388396)	27 (9.8%)	3.17	1.44e-07	8.4e-06									PRF1
															IRF9		Platelet activation, signaling and aggregation (R-HSA-76002)	11 (4.0%)	3.11	0.000913	0.0168									PSMB9
															IRS1		RAF/MAP kinase cascade (R-HSA-5673001)	11 (4.0%)	3.06	0.00103	0.0185									PTEN
															ITGA1		SARS-CoV-2 Infection (R-HSA-9694516)	12 (4.3%)	3.01	0.000719	0.0138									PTGS2
															ITGAE		Hemostasis (R-HSA-109582)	25 (9.1%)	2.74	5.71e-06	0.000227									PTK7
															ITGAL		Viral Infection Pathways (R-HSA-9824446)	31 (11.2%)	2.69	5.93e-07	3.04e-05									PTPN11
															ITGAX		SARS-CoV Infections (R-HSA-9679506)	17 (6.2%)	2.68	0.000243	0.00563									PTPN6
															ITGB1		Disease (R-HSA-1643685)	65 (23.6%)	2.62	3.23e-13	4.03e-11									PYGL
															ITGB7		Signal Transduction (R-HSA-162582)	88 (31.9%)	2.56	1.66e-17	2.9e-15									RPS6
															ITK		Nervous system development (R-HSA-9675108)	17 (6.2%)	2.17	0.00273	0.0418									SAMHD1
															JAML		Unclassified (UNCLASSIFIED)	35 (12.7%)	0.27	3.71e-34	1.94e-31									SDHA
															JCHAIN		Sensory Perception (R-HSA-9709957)	1 (0.4%)	0.12	0.00263	0.0418									SH2D1A
															KIR2DL3															SH2D1B
															KLF2															SIT1
															KLRB1															SKAP2
															KLRD1															SLAMF7
															KLRF1															SNAI1
															KLRG1															SNAI2
															KLRK1															SRGN
															KREMEN1															STAT1
															LAG3															STAT3
															LAMP1															STAT5A
															LAMP3															TAGAP
															LAPTM5															TAP1
															LILRB2															TARP
															LRP1															TBP
															LST1															TBX21
															LY9															TCF7
															LYZ															TFRC
															M6PR															TIGIT
															MAD2L1															TLR3
															MAPK1															TLR7
															MAPK14															TLR8
															MELK															TNF
															MMP2															TNFAIP8
															MMP9															TNFRSF14
															MRC1															TNFRSF17
															MS4A1															TNFRSF9
															NCAM1															TNFSF10
															NCR3															TNFSF13B
															NFATC1															TNFSF18
															NFKBIA															TNFSF4
															NKG7															TWIST1
															NRP1															TYROBP
															NT5E															VCAM1
															OAS1															ZEB1
															OAS2
															PDCD1
															PDCD1LG2
															PECAM1
															PIK3CA
															PMEL
															PRDM1
															PRF1
															PSMB9
															PTEN
															PTGS2
															PTK7
															PTPN11
															PTPN6
															PTPRC
															PYGL
															RORC
															RPS6
															SAMHD1
															SDHA
															SELL
															SH2D1A
															SH2D1B
															SIT1
															SKAP2
															SLAMF7
															SNAI1
															SNAI2
															SRGN
															STAT1
															STAT3
															STAT4
															STAT5A
															TAGAP
															TAP1
															TARP
															TBP
															TBX21
															TCF7
															TDO2
															TFRC
															TGFB1
															TIGIT
															TLR3
															TLR7
															TLR8
															TLR9
															TNFAIP8
															TNFRSF14
															TNFRSF17
															TNFRSF9
															TNFSF10
															TNFSF13B
															TNFSF18
															TNFSF4
															TP63
															TWIST1
															TYROBP
															VCAM1
															VTCN1
															ZEB1
[truncated: 3 more columns]
