# Supplementary material for: RB1 expression and HR proficiency define a poor-outcome molecular subtype of high grade serous ovarian carcinoma
Source: Research Square preprint supplement (doi:10.21203/rs.3.rs-5523163/v1), 2025-07-14
Supplement: Supplementary file 11 [file ef3f15cd692924d9f12f030b.xlsx]

## Sheet: Sheet1
Supplemental Table 9. Complete list of gene expression comparisons of RBL HGSOC evaluated by OmniSeq CGIP.
RB1 low
	Group 1 (BRCAa) vs Group 2 (NBHRa)			Group 1 (BRCAa) vs Group 3 (HRi)			Group 2 (NBHRa) vs Group 3 (HRi)														OR		Difference between groups in gene expression (normalized reads per million, nRPM) was significant at uncorrected P < 0.05 and multiple testing corrected false discovery rate (FDR) < 0.25
Gene	Estimated fold change	P	FDR	Estimated fold change	P	FDR	Estimated fold change	P	FDR												OR		Difference between groups in gene expression (normalized reads per million, nRPM) was not significant but may still be of interest to note as it reached uncorrected P < 0.05
ABCF1	1.15	0.18	0.89	0.94	0.41	0.98	0.83	0.05	0.99
ADGRE5	0.93	0.68	0.97	0.96	0.77	0.98	1	0.98	1
ADORA2A	1.49	0.29	0.95	1.63	0.075	0.71	0.91	0.68	0.99											Volcano plot legend
AIF1	0.7	0.29	0.95	1.14	0.61	0.98	1.08	0.79	0.99
AKT1	0.96	0.82	0.97	0.74	0.022	0.54	0.81	0.15	0.99													Diamond, colored points = Difference between groups in gene expression (normalized reads per million, nRPM) was significant at uncorrected P < 0.05 and multiple testing corrected false discovery rate (FDR) < 0.25
ALOX15B	1.88	0.12	0.84	1.28	0.44	0.98	0.66	0.24	0.99
ARG1	0.72	0.32	0.95	1	0.99	1	1.68	0.02	0.99
AXL	0.5	0.014	0.56	0.96	0.89	1	1.46	0.22	0.99													Circle, colored points = Difference between groups in gene expression (normalized reads per million, nRPM) was not significant but may still be of interest to note as it reached uncorrected P < 0.05
B3GAT1	0.9	0.84	0.97	0.76	0.5	0.98	0.87	0.75	0.99
BAGE	0.67	0.47	0.95	1.21	0.68	0.98	1.91	0.25	0.99
BATF	0.68	0.35	0.95	1.32	0.37	0.98	1.04	0.9	0.99													Grey points = Association with gene's expression resulted in P >= 0.05
BCL2	0.85	0.66	0.97	1.47	0.18	0.95	1.05	0.85	0.99
BCL2L11	1	0.98	0.99	0.96	0.78	0.98	1.02	0.9	0.99
BCL6	0.86	0.45	0.95	0.72	0.043	0.65	0.95	0.8	0.99
BRCA1	0.75	0.43	0.95	1.08	0.76	0.98	1.2	0.48	0.99
BRCA2	1.56	0.2	0.89	1.09	0.76	0.98	0.75	0.29	0.99
BST2	0.73	0.2	0.89	0.49	0.00092	0.1	0.79	0.43	0.99
BTLA	0.88	0.75	0.97	1.04	0.91	1	0.9	0.78	0.99
BUB1	1.09	0.71	0.97	0.79	0.2	0.95	0.79	0.23	0.99
C10orf54	0.99	0.97	0.99	1.27	0.38	0.98	0.99	0.96	0.99
C1QA	0.62	0.16	0.86	1.03	0.9	1	1.13	0.69	0.99
C1QB	0.71	0.35	0.95	0.89	0.67	0.98	0.93	0.81	0.99
CA4	1.57	0.39	0.95	1.44	0.29	0.98	0.74	0.52	0.99
CBLB	0.81	0.46	0.95	0.99	0.95	1	1.12	0.63	0.99
CCL17	0.62	0.3	0.95	0.8	0.52	0.98	0.65	0.28	0.99
CCL18	0.74	0.61	0.95	1.59	0.31	0.98	1.36	0.54	0.99
CCL2	0.49	0.075	0.84	0.8	0.46	0.98	1.05	0.86	0.99
CCL20	0.84	0.75	0.97	0.84	0.65	0.98	0.92	0.85	0.99
CCL21	0.42	0.19	0.89	1.1	0.84	1	1.66	0.41	0.99
CCL22	1.11	0.84	0.97	1.26	0.54	0.98	0.86	0.71	0.99
CCL3	0.78	0.49	0.95	0.81	0.45	0.98	0.91	0.8	0.99
CCL4	0.93	0.86	0.97	1.03	0.93	1	0.83	0.59	0.99
CCL5	0.77	0.52	0.95	0.89	0.7	0.98	0.66	0.18	0.99
CCNB2	1.58	0.31	0.95	1.29	0.42	0.98	0.55	0.0044	0.99
CCR1	0.57	0.11	0.84	1.25	0.45	0.98	1.28	0.4	0.99
CCR2	0.64	0.37	0.95	1.1	0.79	0.98	1.17	0.73	0.99
CCR4	0.79	0.59	0.95	0.9	0.75	0.98	0.78	0.53	0.99
CCR5	0.58	0.23	0.89	1.1	0.78	0.98	1.43	0.38	0.99
CCR6	1.26	0.56	0.95	1.54	0.13	0.89	1.2	0.58	0.99
CCR7	0.83	0.7	0.97	1.03	0.95	1	0.75	0.51	0.99
CD14	0.78	0.34	0.95	1.15	0.52	0.98	1.21	0.49	0.99
CD160	0.92	0.83	0.97	0.93	0.79	0.98	0.84	0.58	0.99
CD163	1.33	0.47	0.95	1.43	0.25	0.98	1.15	0.6	0.99
CD19	0.54	0.19	0.89	1.12	0.75	0.98	1.01	0.99	1
CD1C	1.02	0.97	0.99	1.07	0.84	1	0.85	0.71	0.99
CD1D	1.11	0.77	0.97	2.17	0.0091	0.36	1.3	0.43	0.99
CD2	0.72	0.44	0.95	1.01	0.98	1	0.77	0.46	0.99
CD209	0.67	0.34	0.95	0.99	0.97	1	0.97	0.92	0.99
CD22	1.07	0.89	0.98	1.83	0.12	0.89	1.54	0.34	0.99
CD226	0.86	0.68	0.97	1.31	0.33	0.98	1.1	0.72	0.99
CD244	1.29	0.58	0.95	1.34	0.38	0.98	0.89	0.74	0.99
CD247	0.76	0.58	0.95	1.14	0.73	0.98	0.94	0.89	0.99
CD27	0.75	0.56	0.95	0.83	0.63	0.98	0.61	0.23	0.99
CD274	0.84	0.55	0.95	0.55	0.034	0.65	0.57	0.076	0.99
CD276	0.91	0.61	0.96	0.86	0.3	0.98	0.82	0.25	0.99
CD28	0.98	0.96	0.99	1.4	0.28	0.98	1.17	0.64	0.99
CD3	0.74	0.46	0.95	0.9	0.74	0.98	0.64	0.19	0.99
CD33	0.73	0.44	0.95	1.07	0.79	0.98	1.17	0.57	0.99
CD37	0.7	0.28	0.95	0.91	0.7	0.98	1.11	0.74	0.99
CD38	0.99	0.99	0.99	1.4	0.37	0.98	1	1	1
CD3D	0.69	0.36	0.95	0.91	0.77	0.98	0.71	0.34	0.99
CD3E	0.71	0.47	0.95	1.12	0.75	0.98	0.71	0.35	0.99
CD3G	0.72	0.48	0.95	0.81	0.56	0.98	0.64	0.28	0.99
CD4	0.82	0.58	0.95	1.13	0.66	0.98	0.93	0.77	0.99
CD40	0.74	0.2	0.89	0.55	0.0011	0.1	0.7	0.098	0.99
CD40LG	1.14	0.74	0.97	1.1	0.75	0.98	0.68	0.29	0.99
CD44	3.14	0.00055	0.16	1.55	0.043	0.65	0.56	0.07	0.99
CD47	1.19	0.34	0.95	0.77	0.13	0.89	0.84	0.4	0.99
CD48	0.63	0.21	0.89	1.09	0.77	0.98	0.93	0.8	0.99
CD52	0.83	0.62	0.96	1.09	0.77	0.98	0.81	0.5	0.99
CD53	0.43	0.11	0.84	0.84	0.66	0.98	0.95	0.92	0.99
CD6	0.95	0.91	0.99	1.07	0.82	1	0.79	0.51	0.99
CD63	1.03	0.85	0.97	1.03	0.79	0.98	1.14	0.3	0.99
CD68	0.69	0.12	0.84	0.98	0.9	1	1.13	0.63	0.99
CD69	0.85	0.71	0.97	1	0.99	1	0.69	0.29	0.99
CD70	0.74	0.52	0.95	0.82	0.59	0.98	0.57	0.2	0.99
CD74	0.78	0.39	0.95	0.78	0.26	0.98	0.96	0.88	0.99
CD79A	0.53	0.28	0.95	0.74	0.52	0.98	0.69	0.5	0.99
CD79B	0.7	0.45	0.95	0.9	0.74	0.98	0.68	0.37	0.99
CD8	0.57	0.14	0.85	0.69	0.19	0.95	0.75	0.33	0.99
CD80	0.59	0.11	0.84	0.61	0.088	0.71	0.81	0.5	0.99
CD83	1.05	0.9	0.98	1.13	0.66	0.98	0.94	0.77	0.99
CD86	0.82	0.6	0.95	1.29	0.4	0.98	1	1	1
CD8A	0.77	0.53	0.95	0.9	0.74	0.98	0.83	0.58	0.99
CD8B	0.57	0.23	0.89	0.7	0.29	0.98	0.72	0.33	0.99
CDK1	1.51	0.33	0.95	1.23	0.51	0.98	0.88	0.59	0.99
CDKN2A	0.83	0.73	0.97	1.25	0.58	0.98	2.66	0.035	0.99
CDKN3	1.52	0.41	0.95	1.4	0.34	0.98	0.97	0.9	0.99
CEACAM1	0.38	0.024	0.59	0.81	0.51	0.98	1.31	0.49	0.99
CEACAM8	1.15	0.085	0.84	1.15	0.19	0.95	1.04	0.83	0.99
CIITA	0.93	0.8	0.97	0.6	0.03	0.65	0.63	0.12	0.99
CLEC4C	0.48	0.11	0.84	0.91	0.77	0.98	1.43	0.39	0.99
CMKLR1	0.49	0.027	0.64	0.88	0.64	0.98	1.14	0.63	0.99
CORO1A	0.94	0.85	0.97	1.14	0.6	0.98	0.9	0.7	0.99
CRTAM	0.87	0.75	0.97	0.8	0.55	0.98	0.58	0.2	0.99
CSF1R	0.82	0.58	0.95	0.87	0.61	0.98	1.12	0.67	0.99
CSF2RB	0.79	0.55	0.95	1.22	0.53	0.98	0.89	0.71	0.99
CTAG1B	1.98	0.35	0.95	1.23	0.7	0.98	0.72	0.65	0.99
CTAG2	1.18	0.59	0.95	1.24	0.42	0.98	1.29	0.3	0.99
CTLA4	0.86	0.71	0.97	1.17	0.63	0.98	1.12	0.76	0.99
CTSS	0.71	0.12	0.84	0.83	0.42	0.98	1.09	0.78	0.99
CX3CL1	0.94	0.86	0.97	0.99	0.98	1	0.7	0.23	0.99
CX3CR1	0.74	0.31	0.95	1.05	0.85	1	1.49	0.1	0.99
CXCL1	0.88	0.79	0.97	1.76	0.15	0.91	2.01	0.11	0.99
CXCL10	0.53	0.14	0.86	0.49	0.065	0.71	0.72	0.47	0.99
CXCL11	0.44	0.11	0.84	0.52	0.13	0.89	0.62	0.27	0.99
CXCL13	0.71	0.51	0.95	0.93	0.87	1	0.7	0.39	0.99
CXCL8	1.33	0.53	0.95	1.37	0.41	0.98	1.1	0.84	0.99
CXCL9	0.53	0.23	0.89	0.41	0.052	0.69	0.45	0.14	0.99
CXCR2	0.95	0.89	0.98	1.83	0.047	0.67	1.27	0.55	0.99
CXCR3	0.89	0.68	0.97	0.91	0.7	0.98	0.72	0.24	0.99
CXCR4	0.97	0.94	0.99	1.02	0.94	1	1.09	0.74	0.99
CXCR5	0.92	0.83	0.97	1	1	1	0.82	0.6	0.99
CXCR6	0.39	0.058	0.84	0.75	0.41	0.98	1.36	0.49	0.99
CYBB	0.6	0.083	0.84	0.94	0.77	0.98	1.13	0.67	0.99
DDX58	0.72	0.3	0.95	0.65	0.082	0.71	0.91	0.67	0.99
DGAT2	0.76	0.5	0.95	0.99	0.96	1	1.01	0.97	1
DMBT1	1.31	0.63	0.97	1.18	0.71	0.98	0.78	0.65	0.99
EBI3	0.92	0.84	0.97	1.3	0.41	0.98	0.94	0.85	0.99
EFNA4	0.92	0.75	0.97	0.9	0.62	0.98	0.91	0.59	0.99
EGFR	1.07	0.83	0.97	1.22	0.39	0.98	0.95	0.81	0.99
EGR2	0.57	0.13	0.84	0.9	0.69	0.98	1.36	0.32	0.99
EGR3	0.89	0.83	0.97	1.65	0.27	0.98	2.02	0.15	0.99
EIF2AK2	0.88	0.42	0.95	0.67	0.0016	0.13	0.88	0.44	0.99
ENTPD1	0.97	0.92	0.99	0.8	0.47	0.98	0.89	0.69	0.99
EOMES	2.06	0.13	0.84	1.36	0.41	0.98	0.52	0.11	0.99
FAS	0.7	0.13	0.84	0.74	0.094	0.73	1.08	0.72	0.99
FASLG	1.28	0.56	0.95	1.31	0.45	0.98	0.8	0.57	0.99
FCER1G	0.76	0.35	0.95	0.95	0.82	0.99	0.97	0.92	0.99
FCGR1A	0.75	0.52	0.95	1.11	0.77	0.98	1.02	0.96	0.99
FCGR2B	0.76	0.51	0.95	1.1	0.77	0.98	0.92	0.84	0.99
FCGR3A	0.99	0.98	0.99	1.47	0.25	0.98	0.96	0.88	0.99
FCGR3B	1.13	0.74	0.97	1.81	0.04	0.65	1.25	0.56	0.99
FCRLA	0.69	0.35	0.95	0.7	0.2	0.95	0.53	0.079	0.99
FOXM1	1.04	0.91	0.99	0.89	0.68	0.98	0.72	0.16	0.99
FOXO1	1.3	0.36	0.95	1.48	0.071	0.71	1.24	0.27	0.99
FOXP3	1	0.99	0.99	1	1	1	0.91	0.77	0.99
FUT4	1.14	0.77	0.97	1.66	0.15	0.93	0.9	0.74	0.99
FYB	0.74	0.4	0.95	0.89	0.68	0.98	0.89	0.68	0.99
G6PD	1.08	0.76	0.97	1.26	0.19	0.95	0.92	0.52	0.99
GADD45GIP1	1.24	0.21	0.89	0.97	0.86	1	0.78	0.18	0.99
GAGE1_GAGE12I_GAGE12F	0.9	0.88	0.98	0.85	0.77	0.98	0.91	0.88	0.99
GAGE10	1.09	0.82	0.97	0.82	0.47	0.98	1.1	0.75	0.99
GAGE12J	1.09	0.86	0.97	0.71	0.33	0.98	0.72	0.38	0.99
GAGE13	1.13	0.75	0.97	0.84	0.53	0.98	0.83	0.51	0.99
GAGE2C_GAGE2A_GAGE2E	1.46	0.65	0.97	0.64	0.45	0.98	0.5	0.33	0.99
GATA3	1.03	0.94	0.99	1.22	0.52	0.98	0.67	0.25	0.99
GBP1	0.64	0.062	0.84	0.63	0.037	0.65	0.92	0.75	0.99
GNLY	0.77	0.52	0.95	0.96	0.9	1	0.95	0.9	0.99
GPR18	1.08	0.86	0.97	0.87	0.68	0.98	0.53	0.074	0.99
GRAP2	0.91	0.83	0.97	1.77	0.1	0.77	1.2	0.63	0.99
GUSB	1.04	0.77	0.97	0.91	0.42	0.98	1.05	0.76	0.99
GZMA	0.87	0.76	0.97	1.11	0.75	0.98	0.68	0.25	0.99
GZMB	0.58	0.26	0.91	0.82	0.6	0.98	1	1	1
GZMH	1.08	0.88	0.98	1.4	0.31	0.98	0.8	0.58	0.99
GZMK	0.82	0.68	0.97	0.91	0.8	0.99	0.73	0.47	0.99
HAVCR2	0.76	0.33	0.95	1.12	0.62	0.98	1.36	0.28	0.99
HERC6	0.72	0.36	0.95	0.83	0.52	0.98	1.16	0.59	0.99
HGF	0.69	0.43	0.95	0.98	0.95	1	1.26	0.54	0.99
HIF1A	1	0.99	0.99	0.99	0.94	1	1.1	0.6	0.99
HLA_A	0.77	0.82	0.97	1.84	0.49	0.98	3.54	0.23	0.99
HLA_B	2.08	0.38	0.95	1.64	0.45	0.98	1.27	0.78	0.99
HLA_C	0.82	0.75	0.97	0.91	0.83	1	1.83	0.29	0.99
HLA_DMA	0.89	0.58	0.95	0.72	0.089	0.71	0.85	0.5	0.99
HLA_DMB	1.62	0.41	0.95	1.14	0.77	0.98	1.25	0.67	0.99
HLA_DOA	0.86	0.7	0.97	0.94	0.86	1	0.82	0.54	0.99
HLA_DOB	0.9	0.8	0.97	0.67	0.26	0.98	0.61	0.25	0.99
HLA_DPA1	1.42	0.63	0.97	0.96	0.94	1	0.96	0.95	0.99
HLA_DPB1	0.77	0.4	0.95	0.74	0.19	0.95	0.79	0.43	0.99
HLA_DQA1	2.32	0.14	0.85	1.22	0.69	0.98	0.36	0.06	0.99
HLA_DQA2	1.02	0.96	0.99	0.8	0.37	0.98	0.81	0.48	0.99
HLA_DQB2	1.85	0.2	0.89	0.84	0.61	0.98	0.55	0.15	0.99
HLA_DRA	0.92	0.79	0.97	0.87	0.55	0.98	0.86	0.6	0.99
HLA_DRB1	1.54	0.56	0.95	0.89	0.86	1	0.54	0.38	0.99
HLA_E	0.89	0.54	0.95	0.87	0.33	0.98	0.95	0.81	0.99
HLA_F	0.7	0.34	0.95	0.91	0.76	0.98	1.19	0.57	0.99
HLA_F_AS1	0.96	0.9	0.98	1.06	0.8	0.99	0.82	0.51	0.99
HLA_G	0.8	0.6	0.95	1.21	0.59	0.98	1.11	0.78	0.99
HMBS	1.02	0.95	0.99	1.07	0.73	0.98	0.87	0.31	0.99
ICAM1	0.58	0.12	0.84	1.13	0.69	0.98	1.76	0.11	0.99
ICOS	0.83	0.6	0.95	0.8	0.4	0.98	0.89	0.73	0.99
ICOSLG	1.54	0.12	0.84	1.39	0.089	0.71	0.97	0.84	0.99
ID2	0.98	0.95	0.99	1.3	0.27	0.98	1.31	0.28	0.99
ID3	0.51	0.055	0.84	1.07	0.83	1	1.63	0.15	0.99
IDO1	0.52	0.17	0.88	0.77	0.46	0.98	0.96	0.93	0.99
IDO2	0.86	0.63	0.97	1.27	0.4	0.98	1.25	0.51	0.99
IFI27	0.62	0.094	0.84	0.51	0.0034	0.19	0.7	0.22	0.99
IFI35	0.63	0.022	0.57	0.62	0.0075	0.33	1	0.98	1
IFI44L	0.48	0.088	0.84	0.57	0.13	0.89	1.58	0.29	0.99
IFI6	0.46	0.016	0.56	0.72	0.22	0.98	1.57	0.16	0.99
IFIH1	0.43	0.011	0.56	0.57	0.031	0.65	1.18	0.57	0.99
IFIT1	0.45	0.12	0.84	0.9	0.79	0.98	1.47	0.22	0.99
IFIT2	0.44	0.0038	0.38	0.67	0.11	0.83	1.32	0.34	0.99
IFIT3	0.45	0.032	0.64	0.66	0.2	0.95	1.23	0.54	0.99
IFITM1	0.56	0.016	0.56	0.59	0.0033	0.19	0.98	0.92	0.99
IFITM2	0.72	0.15	0.86	0.73	0.062	0.71	0.85	0.49	0.99
IFNA17	0.47	0.043	0.78	1.18	0.66	0.98	1.44	0.36	0.99
IFNB1	0.65	0.22	0.89	1.28	0.44	0.98	1.48	0.32	0.99
IFNG	1.11	0.8	0.97	1.04	0.89	1	0.74	0.43	0.99
IGF1R	1.19	0.56	0.95	1.02	0.92	1	0.86	0.52	0.99
IGSF6	0.89	0.8	0.97	1.38	0.35	0.98	1.05	0.9	0.99
IKZF1	0.9	0.79	0.97	1.32	0.38	0.98	0.83	0.54	0.99
IKZF2	1.27	0.34	0.95	1.03	0.88	1	0.85	0.35	0.99
IKZF3	0.87	0.77	0.97	1.34	0.41	0.98	1.07	0.88	0.99
IKZF4	0.92	0.83	0.97	1.38	0.26	0.98	1.77	0.07	0.99
IL10	1.3	0.49	0.95	1.4	0.28	0.98	0.89	0.72	0.99
IL10RA	0.77	0.46	0.95	0.92	0.75	0.98	0.93	0.78	0.99
IL12A	1.54	0.4	0.95	1.13	0.72	0.98	0.82	0.62	0.99
IL12B	0.74	0.15	0.86	0.88	0.45	0.98	1.09	0.67	0.99
IL13	0.87	0.59	0.95	0.87	0.5	0.98	1.06	0.8	0.99
IL15	1.18	0.66	0.97	0.81	0.45	0.98	0.75	0.31	0.99
IL17A	0.88	0.073	0.84	1.15	0.2	0.95	1.21	0.17	0.99
IL17F	1.01	0.87	0.97	0.99	0.9	1	1.02	0.71	0.99
IL18	0.89	0.71	0.97	0.95	0.85	1	0.83	0.4	0.99
IL1A	1.08	0.8	0.97	1.24	0.4	0.98	1.03	0.93	0.99
IL1B	0.78	0.56	0.95	0.93	0.81	0.99	0.93	0.85	0.99
IL2	0.97	0.83	0.97	1.12	0.24	0.98	1.04	0.79	0.99
IL21	1.13	0.57	0.95	1.21	0.26	0.98	1.03	0.9	0.99
IL22	1.09	0.5	0.95	0.99	0.88	1	0.92	0.23	0.99
IL23A	1.22	0.54	0.95	1.02	0.93	1	0.82	0.48	0.99
IL2RA	0.86	0.72	0.97	0.87	0.66	0.98	0.99	0.97	1
IL2RB	0.63	0.25	0.9	0.8	0.45	0.98	0.78	0.44	0.99
IL2RG	0.86	0.74	0.97	1.42	0.33	0.98	1.02	0.95	0.99
IL3RA	0.57	0.075	0.84	1	0.98	1	1.33	0.32	0.99
IL4	0.88	0.22	0.89	1	0.99	1	1.04	0.7	0.99
IL6	0.73	0.5	0.95	1.48	0.23	0.98	1.58	0.23	0.99
IL7	0.78	0.5	0.95	1.09	0.77	0.98	1.07	0.84	0.99
IL7R	0.76	0.55	0.95	1.59	0.17	0.95	0.99	0.97	1
IRF1	0.74	0.21	0.89	0.64	0.012	0.42	0.72	0.15	0.99
IRF4	0.49	0.21	0.89	0.81	0.62	0.98	1	0.99	1
IRF9	0.82	0.23	0.89	0.64	0.00036	0.071	0.81	0.18	0.99
IRS1	1.08	0.86	0.97	1.27	0.49	0.98	0.97	0.92	0.99
ISG15	0.43	0.0053	0.42	0.62	0.05	0.69	1.34	0.3	0.99
ISG20	0.78	0.36	0.95	0.73	0.18	0.95	0.72	0.26	0.99
ITGA1	0.72	0.19	0.89	0.76	0.26	0.98	1.01	0.96	0.99
ITGAE	1.05	0.83	0.97	0.86	0.49	0.98	0.92	0.75	0.99
ITGAL	0.66	0.24	0.89	0.98	0.95	1	0.91	0.77	0.99
ITGAM	0.7	0.21	0.89	0.87	0.52	0.98	1.14	0.64	0.99
ITGAX	0.99	0.97	0.99	1.23	0.42	0.98	0.94	0.81	0.99
ITGB1	0.8	0.13	0.84	0.97	0.82	0.99	1.18	0.29	0.99
ITGB2	0.82	0.49	0.95	0.95	0.81	0.99	0.96	0.87	0.99
ITGB7	1.49	0.35	0.95	1.76	0.085	0.71	0.97	0.91	0.99
ITK	1.35	0.51	0.95	1.34	0.4	0.98	0.75	0.4	0.99
JAML	1.56	0.28	0.95	2.02	0.021	0.54	1.1	0.78	0.99
JCHAIN	0.44	0.16	0.86	0.96	0.93	1	0.95	0.93	0.99
KIAA0101	1	0.99	0.99	0.88	0.62	0.98	0.91	0.73	0.99
KIR2DL1	0.99	0.63	0.97	1	0.99	1	0.99	0.71	0.99
KIR2DL2	0.98	0.78	0.97	0.99	0.77	0.98	0.99	0.87	0.99
KIR2DL3	1.33	0.2	0.89	1.22	0.14	0.89	0.94	0.79	0.99
KLF2	0.53	0.081	0.84	1.29	0.37	0.98	1.43	0.26	0.99
KLRB1	0.69	0.44	0.95	1.28	0.51	0.98	1.09	0.84	0.99
KLRD1	1.08	0.85	0.97	1.06	0.85	1	1.42	0.37	0.99
KLRF1	1.82	0.11	0.84	1.27	0.41	0.98	0.72	0.28	0.99
KLRG1	1.12	0.75	0.97	1.35	0.25	0.98	0.99	0.97	1
KLRK1	1.05	0.91	0.99	0.97	0.93	1	0.71	0.34	0.99
KREMEN1	0.91	0.8	0.97	0.92	0.78	0.98	1.15	0.58	0.99
KRT5	1.47	0.53	0.95	1.45	0.41	0.98	0.62	0.34	0.99
KRT7	2.86	0.02	0.57	1.77	0.073	0.71	0.83	0.54	0.99
LAG3	0.85	0.55	0.95	0.68	0.087	0.71	0.67	0.087	0.99
LAMP1	0.73	0.072	0.84	0.99	0.96	1	1.51	0.022	0.99
LAMP3	0.73	0.44	0.95	0.8	0.48	0.98	0.85	0.6	0.99
LAPTM5	0.83	0.53	0.95	0.95	0.82	0.99	0.93	0.79	0.99
LCK	1.97	0.042	0.78	1.92	0.013	0.43	0.79	0.54	0.99
LCN2	2	0.11	0.84	1.71	0.089	0.71	0.73	0.47	0.99
LEXM	1.57	0.32	0.95	0.68	0.27	0.98	0.4	0.028	0.99
LILRB1	0.55	0.087	0.84	0.92	0.77	0.98	1.15	0.71	0.99
LILRB2	0.59	0.17	0.88	1.39	0.26	0.98	1.28	0.41	0.99
LMNA	0.86	0.44	0.95	0.93	0.59	0.98	1.01	0.93	0.99
LRG1	0.86	0.74	0.97	1.1	0.8	0.99	0.98	0.96	0.99
LRP1	0.72	0.12	0.84	0.83	0.32	0.98	1.25	0.37	0.99
LST1	1.24	0.65	0.97	1.17	0.66	0.98	0.96	0.91	0.99
LY9	1.26	0.58	0.95	1.17	0.61	0.98	0.72	0.4	0.99
LYZ	0.81	0.6	0.95	1.01	0.98	1	0.78	0.5	0.99
M6PR	1.07	0.57	0.95	1	0.98	1	0.85	0.25	0.99
MAD2L1	1.7	0.19	0.89	1.37	0.3	0.98	0.9	0.61	0.99
MADCAM1	1.49	0.26	0.92	1.37	0.24	0.98	0.79	0.54	0.99
MAGEA1	0.88	0.66	0.97	0.98	0.95	1	1.18	0.59	0.99
MAGEA10	7.12	0.00079	0.16	1.28	0.46	0.98	0.27	0.022	0.99
MAGEA12	1	0.99	0.99	0.99	0.93	1	1.04	0.85	0.99
MAGEA3	1.49	0.24	0.89	0.95	0.85	1	0.65	0.22	0.99
MAGEA4	1.37	0.65	0.97	0.82	0.7	0.98	0.94	0.92	0.99
MAGEC2	0.84	0.79	0.97	0.59	0.27	0.98	0.74	0.57	0.99
MAPK1	0.79	0.32	0.95	0.95	0.76	0.98	1.2	0.18	0.99
MAPK14	1	0.98	0.99	0.8	0.028	0.64	0.85	0.21	0.99
MELK	1.03	0.93	0.99	0.89	0.64	0.98	0.85	0.49	0.99
MIF	1.04	0.81	0.97	0.93	0.53	0.98	0.95	0.7	0.99
MKI67	1.27	0.55	0.95	0.87	0.66	0.98	0.75	0.36	0.99
MLANA	0.79	0.34	0.95	0.83	0.29	0.98	0.99	0.86	0.99
MMP2	0.49	0.13	0.84	0.55	0.17	0.95	0.85	0.75	0.99
MMP9	0.54	0.21	0.89	0.55	0.14	0.89	0.8	0.63	0.99
MPO	1.44	0.36	0.95	1.38	0.27	0.98	1.26	0.54	0.99
MRC1	1.15	0.77	0.97	1.86	0.074	0.71	1.17	0.55	0.99
MS4A1	0.54	0.25	0.9	0.95	0.89	1	0.95	0.91	0.99
MTOR	1.11	0.57	0.95	1.1	0.48	0.98	1.23	0.14	0.99
MX1	0.5	0.013	0.56	0.5	0.0052	0.26	1.11	0.73	0.99
MYC	0.7	0.099	0.84	0.71	0.063	0.71	1.02	0.93	0.99
NCAM1	0.62	0.34	0.95	0.98	0.96	1	1.27	0.53	0.99
NCF1	0.79	0.47	0.95	1.01	0.97	1	1.07	0.83	0.99
NCR1	1.02	0.95	0.99	1.32	0.29	0.98	1.07	0.84	0.99
NCR3	1	0.99	0.99	1.54	0.11	0.83	1.19	0.6	0.99
NECTIN2	1.1	0.72	0.97	1.11	0.64	0.98	1.06	0.8	0.99
NFATC1	0.93	0.86	0.97	1.21	0.5	0.98	1.13	0.66	0.99
NFKBIA	0.93	0.69	0.97	0.92	0.58	0.98	1.07	0.72	0.99
NKG7	0.9	0.79	0.97	0.91	0.76	0.98	0.63	0.16	0.99
NOS2	1.22	0.33	0.95	1.44	0.041	0.65	1.08	0.77	0.99
NOTCH3	1.29	0.25	0.91	1.08	0.69	0.98	0.81	0.34	0.99
NRP1	0.73	0.082	0.84	0.8	0.18	0.95	1.03	0.91	0.99
NT5E	0.35	0.031	0.64	0.78	0.47	0.98	1.11	0.79	0.99
NTN3	2.08	0.063	0.84	1.55	0.18	0.95	0.83	0.6	0.99
OAS1	0.54	0.017	0.56	0.64	0.044	0.65	1.21	0.51	0.99
OAS2	0.42	0.031	0.64	0.78	0.43	0.98	1.79	0.13	0.99
OAS3	0.59	0.11	0.84	0.71	0.17	0.95	1	0.99	1
PDCD1	1.29	0.55	0.95	1.14	0.67	0.98	0.78	0.4	0.99
PDCD1LG2	0.57	0.22	0.89	0.72	0.35	0.98	0.85	0.65	0.99
PECAM1	0.52	0.22	0.89	0.87	0.73	0.98	1.17	0.77	0.99
PGF	0.85	0.69	0.97	1.2	0.56	0.98	1.03	0.93	0.99
PIK3CA	0.98	0.95	0.99	1.03	0.91	1	1.17	0.44	0.99
PIK3CD	1.07	0.77	0.97	1.01	0.96	1	0.94	0.75	0.99
PMEL	1.25	0.54	0.95	1.59	0.089	0.71	0.96	0.88	0.99
POLR2A	1.11	0.55	0.95	0.86	0.28	0.98	0.84	0.32	0.99
POU2AF1	0.72	0.49	0.95	0.75	0.48	0.98	0.67	0.42	0.99
PRDM1	1.22	0.65	0.97	1.38	0.32	0.98	0.88	0.66	0.99
PRF1	0.8	0.54	0.95	1.01	0.98	1	0.84	0.62	0.99
PSMB9	0.54	0.011	0.56	0.45	7.1e-05	0.028	0.76	0.33	0.99
PTEN	0.77	0.51	0.95	1.3	0.39	0.98	1.46	0.2	0.99
PTGS2	0.94	0.88	0.98	2.15	0.016	0.46	2.62	0.013	0.99
PTK7	1.53	0.17	0.88	1.02	0.93	1	1.03	0.9	0.99
PTPN11	1.09	0.46	0.95	1.08	0.46	0.98	1.13	0.39	0.99
PTPN6	1.28	0.28	0.95	1.08	0.65	0.98	0.74	0.097	0.99
PTPN7	0.79	0.44	0.95	0.86	0.53	0.98	0.85	0.58	0.99
PTPRC	0.78	0.62	0.96	1.16	0.7	0.98	0.87	0.76	0.99
PTPRCAP	0.8	0.56	0.95	1.14	0.66	0.98	1.12	0.73	0.99
PVR	0.95	0.77	0.97	0.94	0.68	0.98	1.11	0.51	0.99
PYGL	1.31	0.34	0.95	0.99	0.97	1	0.9	0.62	0.99
RB1	1.03	0.94	0.99	1.42	0.14	0.9	1.1	0.49	0.99
RORC	1.23	0.69	0.97	1.39	0.38	0.98	0.81	0.56	0.99
RPS6	1.04	0.85	0.97	0.89	0.39	0.98	0.9	0.52	0.99
S100A8	0.93	0.88	0.98	1.87	0.081	0.71	1.28	0.59	0.99
S100A9	0.77	0.59	0.95	1.58	0.16	0.93	1.43	0.4	0.99
SAMHD1	0.78	0.38	0.95	0.97	0.88	1	1.12	0.56	0.99
SDHA	1.13	0.48	0.95	1.14	0.31	0.98	0.9	0.24	0.99
SELL	0.87	0.74	0.97	1.16	0.65	0.98	1.13	0.76	0.99
SH2D1A	0.63	0.32	0.95	1.34	0.39	0.98	1.39	0.44	0.99
SH2D1B	1.25	0.58	0.95	1.31	0.37	0.98	0.82	0.62	0.99
SIT1	1.01	0.98	0.99	0.87	0.71	0.98	0.57	0.21	0.99
SKAP2	0.72	0.23	0.89	1.26	0.3	0.98	1.29	0.26	0.99
SLAMF7	0.98	0.97	0.99	0.92	0.83	1	0.56	0.21	0.99
SLAMF8	0.73	0.38	0.95	0.83	0.54	0.98	0.83	0.59	0.99
SNAI1	0.86	0.68	0.97	1.06	0.86	1	0.99	0.98	1
SNAI2	0.55	0.25	0.9	0.98	0.96	1	1.34	0.53	0.99
SRGN	0.7	0.15	0.86	1.04	0.84	1	1.33	0.26	0.99
SSX2	1.3	0.59	0.95	1.2	0.64	0.98	0.96	0.93	0.99
STAT1	0.69	0.059	0.84	0.7	0.07	0.71	1.04	0.88	0.99
STAT3	0.86	0.23	0.89	0.84	0.081	0.71	1.03	0.86	0.99
STAT4	0.91	0.81	0.97	1.5	0.2	0.95	0.87	0.66	0.99
STAT5A	1.08	0.76	0.97	1.1	0.61	0.98	0.86	0.32	0.99
STAT6	0.95	0.78	0.97	0.84	0.17	0.95	0.94	0.64	0.99
TAGAP	1.15	0.75	0.97	1.6	0.15	0.93	0.83	0.51	0.99
TAP1	0.67	0.24	0.89	0.57	0.035	0.65	0.69	0.14	0.99
TARP	0.57	0.18	0.89	0.73	0.3	0.98	0.92	0.82	0.99
TBP	1.24	0.49	0.95	1.17	0.49	0.98	1.1	0.5	0.99
TBX21	0.82	0.67	0.97	1.11	0.75	0.98	0.75	0.48	0.99
TCF7	1.22	0.62	0.96	1.06	0.83	1	0.84	0.56	0.99
TDO2	0.36	0.048	0.83	0.59	0.22	0.98	0.8	0.65	0.99
TFRC	0.9	0.52	0.95	0.81	0.19	0.95	1.13	0.5	0.99
TGFB1	0.86	0.52	0.95	1.09	0.63	0.98	1.05	0.81	0.99
TIGIT	0.99	0.99	0.99	0.77	0.49	0.98	0.66	0.29	0.99
TLR3	1.17	0.71	0.97	0.89	0.73	0.98	1.02	0.96	0.99
TLR7	0.98	0.97	0.99	1.12	0.74	0.98	1.05	0.89	0.99
TLR8	0.96	0.92	0.99	1.3	0.39	0.98	1.07	0.86	0.99
TLR9	0.79	0.5	0.95	1.12	0.65	0.98	1.1	0.73	0.99
TNF	0.67	0.32	0.95	0.66	0.2	0.95	0.67	0.26	0.99
TNFAIP8	1.1	0.83	0.97	1.18	0.62	0.98	0.83	0.44	0.99
TNFRSF14	0.73	0.17	0.88	0.8	0.22	0.98	0.86	0.47	0.99
TNFRSF17	0.85	0.74	0.97	1.03	0.93	1	0.98	0.96	0.99
TNFRSF18	1.04	0.93	0.99	1.22	0.59	0.98	0.74	0.43	0.99
TNFRSF4	1.04	0.92	0.99	0.89	0.69	0.98	0.77	0.4	0.99
TNFRSF9	1.04	0.92	0.99	0.81	0.54	0.98	0.71	0.33	0.99
TNFSF10	0.39	0.0037	0.38	0.57	0.016	0.46	1.07	0.8	0.99
TNFSF13B	0.52	0.091	0.84	0.99	0.98	1	1.38	0.31	0.99
TNFSF14	0.89	0.82	0.97	0.96	0.93	1	0.95	0.92	0.99
TNFSF18	0.49	0.058	0.84	0.83	0.5	0.98	1.72	0.098	0.99
TNFSF4	1.21	0.59	0.95	1.02	0.94	1	0.84	0.55	0.99
TNFSF9	0.57	0.18	0.89	1.17	0.63	0.98	1.35	0.42	0.99
TOP2A	1.25	0.31	0.95	0.75	0.079	0.71	0.75	0.19	0.99
TP63	1.28	0.42	0.95	1.22	0.35	0.98	0.72	0.29	0.99
TRIM29	1.93	0.15	0.86	1.03	0.91	1	0.5	0.045	0.99
TUBB	0.95	0.78	0.97	1.1	0.51	0.98	1.02	0.89	0.99
TWIST1	0.93	0.88	0.98	0.88	0.74	0.98	1.23	0.67	0.99
TYROBP	0.78	0.53	0.95	0.89	0.7	0.98	0.83	0.51	0.99
VCAM1	0.41	0.06	0.84	0.57	0.14	0.89	1.04	0.93	0.99
VEGFA	1.11	0.68	0.97	0.71	0.072	0.71	0.77	0.25	0.99
VTCN1	1.37	0.59	0.95	1.39	0.45	0.98	1.4	0.48	0.99
XAGE1B	0.63	0.41	0.95	1.29	0.6	0.98	1.99	0.21	0.99
ZAP70	0.77	0.46	0.95	0.9	0.71	0.98	0.73	0.37	0.99
ZBTB46	1.34	0.42	0.95	1.16	0.57	0.98	0.92	0.66	0.99
ZEB1	0.4	0.019	0.57	0.96	0.88	1	1.51	0.22	0.99
